# Supplementary material for: Detailed Evolutionary Analyses of the F Gene in the Respiratory Syncytial Virus Subgroup A
Source: MDPI journal article supplement (doi:10.3390/v13122525), 2021-12-15
Supplement: s1 [file s1]

## Supplementary Data

### Supplementary Tables

**Supplementary Table S1.** Strains used in this study.

| GenBank accession No. | Strain                                    | Collection year | Country     | Genotype | References or authorship |
|-----------------------|-------------------------------------------|-----------------|-------------|----------|--------------------------|
| JX198113              | Tracy                                     | 1987            | USA         | GA1      | 1                        |
| KJ723467              | RSVA/Homo sapiens/USA/86I-044A-01/1986    | 1986            | USA         | GA1      | Das, S.R. et al.         |
| KJ723474              | RSVA/Homo sapiens/USA/89I-123A-01/1989    | 1989            | USA         | GA1      | Das, S.R. et al.         |
| KJ723475              | RSVA/Homo sapiens/USA/86I-139A-01/1986    | 1986            | USA         | GA1      | Das, S.R. et al.         |
| KJ723478              | RSVA/Homo sapiens/USA/82I-158A-01/1982    | 1982            | USA         | GA1      | Das, S.R. et al.         |
| KJ723489              | RSVA/Homo sapiens/USA/90I-283A-01/1990    | 1990            | USA         | GA1      | Das, S.R. et al.         |
| KP258695              | RSVA/Homo sapiens/USA/88E-072-01/1988     | 1988            | USA         | GA1      | Das, S.R. et al.         |
| KP258717              | RSVA/Homo sapiens/USA/94E-091-01/1994     | 1994            | USA         | GA1      | Das, S.R. et al.         |
| KP258719              | RSVA/Homo sapiens/USA/88E-082-01/1988     | 1988            | USA         | GA1      | Das, S.R. et al.         |
| KP258729              | RSVA/Homo sapiens/USA/90P-147-01/1990     | 1990            | USA         | GA1      | Das, S.R. et al.         |
| KP258741              | RSVA/Homo sapiens/USA/90E-112-01/1990     | 1990            | USA         | GA1      | Das, S.R. et al.         |
| KP258744              | RSVA/Homo sapiens/USA/95P-073-01/1995     | 1995            | USA         | GA1      | Das, S.R. et al.         |
| KU316103              | RSVA/Homo sapiens/USA/83G-012-01/1983     | 1983            | USA         | GA1      | Das, S.R. et al.         |
| KU316106              | RSVA/Homo sapiens/USA/78I-004A-01-01/1977 | 1977            | USA         | GA1      | Das, S.R. et al.         |
| KU316107              | RSVA/Homo sapiens/USA/95P-071-01/1995     | 1995            | USA         | GA1      | Das, S.R. et al.         |
| KU316109              | RSVA/Homo sapiens/USA/92I-109A-01-01/1992 | 1992            | USA         | GA1      | Das, S.R. et al.         |
| KU316119              | RSVA/Homo sapiens/USA/89E-503-01/1989     | 1989            | USA         | GA1      | Das, S.R. et al.         |
| KU316120              | RSVA/Homo sapiens/USA/86I-024A-01-01/1985 | 1985            | USA         | GA1      | Das, S.R. et al.         |
| KU316123              | RSVA/Homo sapiens/USA/97I-058A-01-01/1997 | 1997            | USA         | GA1      | Das, S.R. et al.         |
| KU316124              | RSVA/Homo sapiens/USA/92I-050A-01-01/1992 | 1992            | USA         | GA1      | Das, S.R. et al.         |
| KU316140              | RSVA/Homo sapiens/USA/78I-046A-01-01/1978 | 1978            | USA         | GA1      | Das, S.R. et al.         |
| KU316146              | RSVA/Homo sapiens/USA/83G-002-01/1983     | 1983            | USA         | GA1      | Das, S.R. et al.         |
| KU316152              | RSVA/Homo sapiens/USA/85P-399-01/1985     | 1985            | USA         | GA1      | Das, S.R. et al.         |
| KU316153              | RSVA/Homo sapiens/USA/88E-042-01/1988     | 1988            | USA         | GA1      | Das, S.R. et al.         |
| KU316162              | RSVA/Homo sapiens/USA/88E-033-01/1988     | 1988            | USA         | GA1      | Das, S.R. et al.         |
| KU316164              | RSVA/Homo sapiens/USA/95P-326-01/1995     | 1995            | USA         | GA1      | Das, S.R. et al.         |
| KU316165              | RSVA/Homo sapiens/USA/88I-141A-01-01/1987 | 1987            | USA         | GA1      | Das, S.R. et al.         |
| KU316168              | RSVA/Homo sapiens/USA/78I-026A-01-01/1977 | 1977            | USA         | GA1      | Das, S.R. et al.         |
| KU316171              | RSVA/Homo sapiens/USA/78I-016A-01-01/1977 | 1977            | USA         | GA1      | Das, S.R. et al.         |
| KU316174              | RSVA/Homo sapiens/USA/88I-095A-01-01/1987 | 1987            | USA         | GA1      | Das, S.R. et al.         |
| MF361904              | MON/9/92                                  | 1992            | Uruguay     | GA1      | 2                        |
| MG642060              | RSVA/Homo sapiens/USA/MCRSV_211/1980      | 1980            | USA         | GA1      | Shabman, R. et al.       |
| MG642067              | RSVA/Homo sapiens/USA/MCRSV_254/1987      | 1987            | USA         | GA1      | Shabman, R. et al.       |
| MG642075              | RSVA/Homo sapiens/USA/MCRSV_248/1986      | 1986            | USA         | GA1      | Shabman, R. et al.       |
| MG813989              | A-TX-Tracy-1989-WGS                       | 1989            | USA         | GA1      | Piedra, F.-A. et al.     |
| JF920057              | A/WI/629-4239/98                          | 1998            | USA         | GA2      | 3                        |
| JQ901447              | 01-000312                                 | 2001            | Netherlands | GA2      | 4                        |
| JQ901452              | 01-031282                                 | 2001            | Netherlands | GA2      | 4                        |
| JQ901453              | 02-000110                                 | 2002            | Netherlands | GA2      | 4                        |
| JQ901457              | 03-036456                                 | 2003            | Netherlands | GA2      | 4                        |
| JQ901458              | 03-036544                                 | 2003            | Netherlands | GA2      | 4                        |
| JX015480              | 07-040054                                 | 2007            | Netherlands | GA2      | 4                        |
| JX015486              | 05-000417                                 | 2005            | Netherlands | GA2      | 4                        |

---

|          |                                     |      |           |     |                    |
|----------|-------------------------------------|------|-----------|-----|--------------------|
| JX069799 | RSVA/human/USA/A2001-03-12/2001/GA2 | 2001 | USA       | GA2 | Lorenzi, H. et al. |
| JX198105 | TX-79309                            | 2005 | USA       | GA2 | 1                  |
| JX198108 | TX-79321                            | 2005 | USA       | GA2 | 1                  |
| JX198110 | TX-79334                            | 2005 | USA       | GA2 | 1                  |
| JX198120 | TX-79223                            | 2004 | USA       | GA2 | 1                  |
| JX198126 | TX-79256                            | 2004 | USA       | GA2 | 1                  |
| JX198128 | TX-79258                            | 2004 | USA       | GA2 | 1                  |
| JX198131 | TX-79299                            | 2005 | USA       | GA2 | 1                  |
| JX198134 | TX-79308                            | 2005 | USA       | GA2 | 1                  |
| KF826848 | RSVA/Homo sapiens/AUS/249/2007      | 2007 | Australia | GA2 | Lorenzi, H. et al. |

---

**Supplementary Table S1** (continued). Strains used in this study.

| GenBank accession No. | Strain                                    | Collection year | Country | Genotype | References or authorship |
|-----------------------|-------------------------------------------|-----------------|---------|----------|--------------------------|
| KJ627248              | RSVA/Homo sapiens/PER/FLA6927/2009        | 2009            | Peru    | GA2      | Wentworth, D.E. et al.   |
| KJ627255              | RSVA/Homo sapiens/PER/FLA6533/2009        | 2009            | Peru    | GA2      | Wentworth, D.E. et al.   |
| KJ627260              | RSVA/Homo sapiens/PER/FLA0756/2008        | 2008            | Peru    | GA2      | Wentworth, D.E. et al.   |
| KJ627276              | RSVA/Homo sapiens/PER/FLA6891/2009        | 2009            | Peru    | GA2      | Wentworth, D.E. et al.   |
| KJ627284              | RSVA/Homo sapiens/PER/FLA7779/2009        | 2009            | Peru    | GA2      | Wentworth, D.E. et al.   |
| KJ627289              | RSVA/Homo sapiens/PER/FLA7440/2009        | 2009            | Peru    | GA2      | Wentworth, D.E. et al.   |
| KJ627305              | RSVA/Homo sapiens/PER/FLU5848/2007        | 2007            | Peru    | GA2      | Wentworth, D.E. et al.   |
| KJ627311              | RSVA/Homo sapiens/PER/FLA2268/2008        | 2008            | Peru    | GA2      | Wentworth, D.E. et al.   |
| KJ627314              | RSVA/Homo sapiens/PER/FLA7464/2009        | 2009            | Peru    | GA2      | Wentworth, D.E. et al.   |
| KJ627324              | RSVA/Homo sapiens/PER/FLA6757/2009        | 2009            | Peru    | GA2      | Wentworth, D.E. et al.   |
| KJ627327              | RSVA/Homo sapiens/PER/FLU7450/2007        | 2007            | Peru    | GA2      | Wentworth, D.E. et al.   |
| KJ627336              | RSVA/Homo sapiens/PER/FLA0535/2008        | 2008            | Peru    | GA2      | Wentworth, D.E. et al.   |
| KJ627339              | RSVA/Homo sapiens/PER/FLA6331/2009        | 2009            | Peru    | GA2      | Wentworth, D.E. et al.   |
| KJ627352              | RSVA/Homo sapiens/PER/FLU5725/2007        | 2007            | Peru    | GA2      | Wentworth, D.E. et al.   |
| KJ627353              | RSVA/Homo sapiens/PER/FLA0489/2008        | 2008            | Peru    | GA2      | Wentworth, D.E. et al.   |
| KJ627361              | RSVA/Homo sapiens/PER/FLU5529/2007        | 2007            | Peru    | GA2      | Wentworth, D.E. et al.   |
| KJ627366              | RSVA/Homo sapiens/PER/FLA6758/2009        | 2009            | Peru    | GA2      | Wentworth, D.E. et al.   |
| KP317933              | Kilifi_10891_51_RSVA_2008                 | 2008            | Kenya   | GA2      | 5                        |
| KP317937              | Kilifi_10891_59_RSVA_2007                 | 2007            | Kenya   | GA2      | 5                        |
| KP317942              | Kilifi_10891_57_RSVA_2006                 | 2006            | Kenya   | GA2      | 5                        |
| KP317944              | Kilifi_9696_45_RSVA_2006                  | 2006            | Kenya   | GA2      | 5                        |
| KP317950              | Kilifi_10899_38_RSVA_2009                 | 2009            | Kenya   | GA2      | 5                        |
| KP856968              | RSVA/Homo sapiens/USA/98I-003A-01/1998    | 1998            | USA     | GA2      | Das, S.R. et al.         |
| KU316091              | RSVA/Homo sapiens/USA/98I-005A-01-01/1998 | 1998            | USA     | GA2      | Das, S.R. et al.         |
| KU316141              | RSVA/Homo sapiens/USA/98E-126-01/1998     | 1998            | USA     | GA2      | Das, S.R. et al.         |
| LC337816              | HRSV/Yokohama.JPN/V13828/1996             | 1996            | Japan   | GA2      | Saikusa, M. et al.       |
| LC337817              | HRSV/Yokohama.JPN/V13835/1996             | 1996            | Japan   | GA2      | Saikusa, M. et al.       |
| LC337818              | HRSV/Yokohama.JPN/V13933/1997             | 1997            | Japan   | GA2      | Saikusa, M. et al.       |
| LC337820              | HRSV/Yokohama.JPN/V14040/1997             | 1997            | Japan   | GA2      | Saikusa, M. et al.       |
| LC337821              | HRSV/Yokohama.JPN/V14140/1997             | 1997            | Japan   | GA2      | Saikusa, M. et al.       |
| LC337823              | HRSV/Yokohama.JPN/V14179/1997             | 1997            | Japan   | GA2      | Saikusa, M. et al.       |
| LC337833              | HRSV/Yokohama.JPN/V14835/1997             | 1997            | Japan   | GA2      | Saikusa, M. et al.       |
| LC337842              | HRSV/Yokohama.JPN/P203/1999               | 1999            | Japan   | GA2      | Saikusa, M. et al.       |
| LC337892              | HRSV/Yokohama.JPN/P2363/2003              | 2003            | Japan   | GA2      | Saikusa, M. et al.       |
| LC337914              | HRSV/Yokohama.JPN/P3200/2005              | 2005            | Japan   | GA2      | Saikusa, M. et al.       |
| LC337917              | HRSV/Yokohama.JPN/P3587/2006              | 2006            | Japan   | GA2      | Saikusa, M. et al.       |
| LC337918              | HRSV/Yokohama.JPN/P3623/2006              | 2006            | Japan   | GA2      | Saikusa, M. et al.       |
| LC337919              | HRSV/Yokohama.JPN/P3688/2007              | 2007            | Japan   | GA2      | Saikusa, M. et al.       |
| LC365787              | HRSV/Yokohama.JPN/P3941/2007              | 2007            | Japan   | GA2      | Saikusa, M. et al.       |
| LC365789              | HRSV/Yokohama.JPN/P4073/2007              | 2007            | Japan   | GA2      | Saikusa, M. et al.       |
| LC365792              | HRSV/Yokohama.JPN/P4101/2007              | 2007            | Japan   | GA2      | Saikusa, M. et al.       |
| LC365795              | HRSV/Yokohama.JPN/P4388/2008              | 2008            | Japan   | GA2      | Saikusa, M. et al.       |
| LC365797              | HRSV/Yokohama.JPN/P4403/2008              | 2008            | Japan   | GA2      | Saikusa, M. et al.       |
| LC365799              | HRSV/Yokohama.JPN/P4422/2008              | 2008            | Japan   | GA2      | Saikusa, M. et al.       |
| LC365801              | HRSV/Yokohama.JPN/P4427/2008              | 2008            | Japan   | GA2      | Saikusa, M. et al.       |
| LC365803              | HRSV/Yokohama.JPN/P4432/2008              | 2008            | Japan   | GA2      | Saikusa, M. et al.       |
| LC365815              | HRSV/Yokohama.JPN/P4487/2008              | 2008            | Japan   | GA2      | Saikusa, M. et al.       |
| LC365816              | HRSV/Yokohama.JPN/P4494/2008              | 2008            | Japan   | GA2      | Saikusa, M. et al.       |
| MF445965              | FJ081103-01                               | 2008            | China   | GA2      | Su, Y. et al.            |

---

|          |              |      |       |     |               |
|----------|--------------|------|-------|-----|---------------|
| MF445966 | FJ090104-33  | 2009 | China | GA2 | Su, Y. et al. |
| MF445967 | FJ090302-03  | 2009 | China | GA2 | Su, Y. et al. |
| MF445968 | FJ101224-40  | 2010 | China | GA2 | Su, Y. et al. |
| MF445969 | FJ101118-01  | 2010 | China | GA2 | Su, Y. et al. |
| MF445970 | FJ101225-02  | 2010 | China | GA2 | Su, Y. et al. |
| MF445971 | FJ101011-37  | 2010 | China | GA2 | Su, Y. et al. |
| MF445972 | FJ101011-38  | 2010 | China | GA2 | Su, Y. et al. |
| MF445973 | FJ101213-49  | 2010 | China | GA2 | Su, Y. et al. |
| MF445974 | FJ091113-21A | 2009 | China | GA2 | Su, Y. et al. |
| MF445975 | FJ091221-01A | 2009 | China | GA2 | Su, Y. et al. |

---

**Supplementary Table S1** (continued). Strains used in this study.

| GenBank accession No. | Strain                                    | Collection year | Country     | Genotype | References or authorship |
|-----------------------|-------------------------------------------|-----------------|-------------|----------|--------------------------|
| FJ948820              | 98-25147-X                                | 1999            | Netherlands | GA3      | 6                        |
| JX069798              | RSVA/human/USA/A2001-02-20/2001/GA2       | 2001            | USA         | GA3      | Lorenzi, H. et al.       |
| JX682716              | CQ_Mar-2012/3155                          | 2012            | China       | GA3      | 7                        |
| JX682745              | CQ_Dec-2010/1148                          | 2010            | China       | GA3      | 7                        |
| KJ627647              | RSV-A/US/BID-V8313/2001                   | 2001            | USA         | GA3      | Newman, R.M. et al.      |
| KJ627681              | RSV-A/US/BID-V8425/2001                   | 2001            | USA         | GA3      | Newman, R.M. et al.      |
| KP119746              | HRSV-A-GZ08-12                            | 2012            | Hong Kong   | GA3      | 8                        |
| KP218910              | HRSV-A-GZ08-0                             | 2008            | China       | GA3      | 8                        |
| KU316118              | RSVA/Homo sapiens/USA/961-029A-01-01/1996 | 1996            | USA         | GA3      | Das, S.R. et al.         |
| KU316139              | RSVA/Homo sapiens/USA/941-091A-01-01/1994 | 1994            | USA         | GA3      | Das, S.R. et al.         |
| KU950573              | RSVA/Homo sapiens/USA/TH_10681/2006       | 2006            | USA         | GA3      | Das, S.R. et al.         |
| KY296708              | BJ04-01                                   | 2004            | China       | GA3      | 9                        |
| KY296709              | BJ04-23                                   | 2004            | China       | GA3      | 9                        |
| KY296710              | BJ04-32                                   | 2004            | China       | GA3      | 9                        |
| KY296711              | BJ04-34                                   | 2004            | China       | GA3      | 9                        |
| KY296712              | BJ04-44                                   | 2004            | China       | GA3      | 9                        |
| KY296715              | BJ_09-105                                 | 2005            | China       | GA3      | 9                        |
| KY296718              | BJ_10-02                                  | 2005            | China       | GA3      | 9                        |
| KY296747              | GZ11-18                                   | 2005            | China       | GA3      | 9                        |
| KY296751              | GZ11-21                                   | 2005            | China       | GA3      | 9                        |
| LC337812              | HRSV/Yokohama.JPN/V10831/1992             | 1992            | Japan       | GA3      | Saikusa, M. et al.       |
| LC337819              | HRSV/Yokohama.JPN/V13968/1997             | 1997            | Japan       | GA3      | Saikusa, M. et al.       |
| LC337824              | HRSV/Yokohama.JPN/V14337/1997             | 1997            | Japan       | GA3      | Saikusa, M. et al.       |
| LC337830              | HRSV/Yokohama.JPN/V14823/1997             | 1997            | Japan       | GA3      | Saikusa, M. et al.       |
| LC337875              | HRSV/Yokohama.JPN/P1419/2001              | 2001            | Japan       | GA3      | Saikusa, M. et al.       |
| LC337897              | HRSV/Yokohama.JPN/P2746/2004              | 2004            | Japan       | GA3      | Saikusa, M. et al.       |
| MG642033              | RSVA/Homo sapiens/USA/MCRSV_265/1994      | 1994            | USA         | GA3      | Shabman, R. et al.       |
| MG642050              | RSVA/Homo sapiens/USA/MCRSV_261/1994      | 1994            | USA         | GA3      | Shabman, R. et al.       |
| JX198137              | TX-37425                                  | 1987            | USA         | GA4      | 1                        |
| KJ723486              | RSVA/Homo sapiens/USA/79I-039A-01/1979    | 1979            | USA         | GA4      | Das, S.R. et al.         |
| KJ723488              | RSVA/Homo sapiens/USA/81I-123A-01/1981    | 1981            | USA         | GA4      | Das, S.R. et al.         |
| KP258696              | RSVA/Homo sapiens/USA/86E-155-01/1986     | 1986            | USA         | GA4      | Das, S.R. et al.         |
| KP258704              | RSVA/Homo sapiens/USA/94I-009A-01/1994    | 1994            | USA         | GA4      | Das, S.R. et al.         |
| KP258715              | RSVA/Homo sapiens/USA/88E-009-01/1988     | 1988            | USA         | GA4      | Das, S.R. et al.         |
| KP856969              | RSVA/Homo sapiens/USA/79E-495-01/1979     | 1979            | USA         | GA4      | Das, S.R. et al.         |
| KU316135              | RSVA/Homo sapiens/USA/81I-090A-01-01/1981 | 1981            | USA         | GA4      | Das, S.R. et al.         |
| KU316137              | RSVA/Homo sapiens/USA/79E-040-01/1979     | 1979            | USA         | GA4      | Das, S.R. et al.         |
| KU316143              | RSVA/Homo sapiens/USA/82G-164-01/1982     | 1982            | USA         | GA4      | Das, S.R. et al.         |
| KU316149              | RSVA/Homo sapiens/USA/81E-078-01/1977     | 1977            | USA         | GA4      | Das, S.R. et al.         |
| KU316150              | RSVA/Homo sapiens/USA/78G-168-01/1978     | 1978            | USA         | GA4      | Das, S.R. et al.         |
| KU316157              | RSVA/Homo sapiens/USA/79I-050A-01-01/1979 | 1979            | USA         | GA4      | Das, S.R. et al.         |
| KU316178              | RSVA/Homo sapiens/USA/79E-191-01/1979     | 1979            | USA         | GA4      | Das, S.R. et al.         |
| MG642028              | RSVA/Homo sapiens/USA/MCRSV_220/1980      | 1980            | USA         | GA4      | Shabman, R. et al.       |
| MG642040              | RSVA/Homo sapiens/USA/MCRSV_214/1980      | 1980            | USA         | GA4      | Shabman, R. et al.       |
| MG642074              | RSVA/Homo sapiens/USA/MCRSV_209/1980      | 1980            | USA         | GA4      | Shabman, R. et al.       |
| JQ901448              | 01-000583                                 | 2001            | Netherlands | GA5      | 4                        |
| JQ901449              | 01-000868                                 | 2001            | Netherlands | GA5      | 4                        |
| JQ901450              | 01-002215                                 | 2001            | Netherlands | GA5      | 4                        |
| JQ901451              | 01-002279                                 | 2001            | Netherlands | GA5      | 4                        |

---

|          |                                 |      |             |     |                    |
|----------|---------------------------------|------|-------------|-----|--------------------|
| JQ901454 | 02-00291                        | 2002 | Netherlands | GA5 | 4                  |
| JQ901455 | 02-017863                       | 2002 | Netherlands | GA5 | 4                  |
| JQ901456 | 03-033338                       | 2003 | Netherlands | GA5 | 4                  |
| JX015485 | 05-000257                       | 2005 | Netherlands | GA5 | 4                  |
| JX015487 | 06-000103                       | 2006 | Netherlands | GA5 | 4                  |
| JX015488 | 06-000827                       | 2006 | Netherlands | GA5 | 4                  |
| JX069803 | RSVA/human/USA/A2000-03-04/2000 | 2000 | USA         | GA5 | Lorenzi, H. et al. |
| JX198106 | TX-79310                        | 2005 | USA         | GA5 | 1                  |
| JX198109 | TX-79326                        | 2005 | USA         | GA5 | 1                  |
| JX198111 | TX-79365                        | 2005 | USA         | GA5 | 1                  |

---

**Supplementary Table S1** (continued). Strains used in this study.

| GenBank accession No. | Strain                              | Collection year | Country   | Genotype | References or authorship |
|-----------------------|-------------------------------------|-----------------|-----------|----------|--------------------------|
| JX198114              | TX-50106                            | 1991            | USA       | GA5      | 1                        |
| JX198115              | TX-50437                            | 1991            | USA       | GA5      | 1                        |
| JX198116              | TX-61245                            | 1993            | USA       | GA5      | 1                        |
| JX198117              | TX-79216                            | 2004            | USA       | GA5      | 1                        |
| JX198118              | TX-79218                            | 2004            | USA       | GA5      | 1                        |
| JX198119              | TX-79219                            | 2004            | USA       | GA5      | 1                        |
| JX198121              | TX-79228                            | 2004            | USA       | GA5      | 1                        |
| JX198122              | TX-79230                            | 2004            | USA       | GA5      | 1                        |
| JX198123              | TX-79240                            | 2004            | USA       | GA5      | 1                        |
| JX198124              | TX-79248                            | 2004            | USA       | GA5      | 1                        |
| JX198125              | TX-79254                            | 2004            | USA       | GA5      | 1                        |
| JX198127              | TX-79257                            | 2004            | USA       | GA5      | 1                        |
| JX198129              | TX-79285                            | 2004            | USA       | GA5      | 1                        |
| JX198133              | TX-79306                            | 2005            | USA       | GA5      | 1                        |
| JX198135              | TX-68357                            | 1994            | USA       | GA5      | 1                        |
| JX198139              | TX-66125                            | 1994            | USA       | GA5      | 1                        |
| KC618407              | 9278                                | 2007            | Italy     | GA5      | Piralla, A. et al.       |
| KF530260              | RSVA/Homo sapiens/ARG/170/2005      | 2005            | Argentina | GA5      | Lorenzi, H. et al.       |
| KF530268              | RSVA/Homo sapiens/MEX/59/2007       | 2007            | Mexico    | GA5      | Lorenzi, H. et al.       |
| KF826816              | RSVA/Homo sapiens/MEX/25/2005       | 2005            | Mexico    | GA5      | Lorenzi, H. et al.       |
| KF826823              | RSVA/Homo sapiens/USA/629-4360/1998 | 1998            | USA       | GA5      | Lorenzi, H. et al.       |
| KF826824              | RSVA/Homo sapiens/USA/629-4392/1998 | 1998            | USA       | GA5      | Lorenzi, H. et al.       |
| KF826826              | RSVA/Homo sapiens/MEX/23/2004       | 2004            | Mexico    | GA5      | Lorenzi, H. et al.       |
| KF826827              | RSVA/Homo sapiens/ARG/159/2004      | 2004            | Argentina | GA5      | Lorenzi, H. et al.       |
| KF826828              | RSVA/Homo sapiens/ARG/162/2004      | 2004            | Argentina | GA5      | Lorenzi, H. et al.       |
| KF826832              | RSVA/Homo sapiens/ITA/120/2009      | 2009            | Italy     | GA5      | Lorenzi, H. et al.       |
| KF826836              | RSVA/Homo sapiens/MEX/26/2006       | 2006            | Mexico    | GA5      | Lorenzi, H. et al.       |
| KF826837              | RSVA/Homo sapiens/MEX/27/2006       | 2006            | Mexico    | GA5      | Lorenzi, H. et al.       |
| KF826841              | RSVA/Homo sapiens/ARG/190/2007      | 2007            | Argentina | GA5      | Lorenzi, H. et al.       |
| KF826846              | RSVA/Homo sapiens/ARG/202/2008      | 2008            | Argentina | GA5      | Lorenzi, H. et al.       |
| KF826847              | RSVA/Homo sapiens/AUS/248/2007      | 2007            | Australia | GA5      | Lorenzi, H. et al.       |
| KF826850              | RSVA/Homo sapiens/USA/629-11-1/2008 | 2008            | USA       | GA5      | Lorenzi, H. et al.       |
| KF826852              | RSVA/Homo sapiens/USA/629-1/2007    | 2007            | USA       | GA5      | Lorenzi, H. et al.       |
| KF826854              | RSVA/Homo sapiens/ITA/119/2009      | 2009            | Italy     | GA5      | Lorenzi, H. et al.       |
| KF973332              | RSV-A/US/BID-V7349/2002             | 2002            | USA       | GA5      | 10                       |
| KF973340              | RSV-A/US/BID-V7359/2002             | 2002            | USA       | GA5      | 10                       |
| KJ627649              | RSV-A/US/BID-V8316/2001             | 2001            | USA       | GA5      | Newman, R.M. et al.      |
| KJ627652              | RSV-A/US/BID-V8320/2002             | 2002            | USA       | GA5      | Newman, R.M. et al.      |
| KJ627654              | RSV-A/US/BID-V8323/2002             | 2002            | USA       | GA5      | Newman, R.M. et al.      |
| KJ627656              | RSV-A/US/BID-V8352/2003             | 2003            | USA       | GA5      | Newman, R.M. et al.      |
| KJ627662              | RSV-A/US/BID-V8372/2003             | 2003            | USA       | GA5      | Newman, R.M. et al.      |
| KJ627664              | RSV-A/US/BID-V8376/2003             | 2003            | USA       | GA5      | Newman, R.M. et al.      |
| KJ627668              | RSV-A/US/BID-V8384/2003             | 2003            | USA       | GA5      | Newman, R.M. et al.      |
| KJ627671              | RSV-A/US/BID-V8405/2003             | 2003            | USA       | GA5      | Newman, R.M. et al.      |
| KJ627675              | RSV-A/US/BID-V8415/2001             | 2001            | USA       | GA5      | Newman, R.M. et al.      |
| KJ627676              | RSV-A/US/BID-V8419/2001             | 2001            | USA       | GA5      | Newman, R.M. et al.      |
| KJ627679              | RSV-A/US/BID-V8423/2001             | 2001            | USA       | GA5      | Newman, R.M. et al.      |
| KJ627684              | RSV-A/US/BID-V8434/2001             | 2001            | USA       | GA5      | Newman, R.M. et al.      |
| KJ627687              | RSV-A/US/BID-V8437/2001             | 2001            | USA       | GA5      | Newman, R.M. et al.      |

---

|          |                         |      |     |     |                     |
|----------|-------------------------|------|-----|-----|---------------------|
| KJ627690 | RSV-A/US/BID-V8456/2001 | 2001 | USA | GA5 | Newman, R.M. et al. |
| KJ627693 | RSV-A/US/BID-V8466/2001 | 2001 | USA | GA5 | Newman, R.M. et al. |
| KJ627696 | RSV-A/US/BID-V8471/2001 | 2001 | USA | GA5 | Newman, R.M. et al. |
| KJ627701 | RSV-A/US/BID-V8477/2001 | 2001 | USA | GA5 | Newman, R.M. et al. |
| KJ627707 | RSV-A/US/BID-V8486/2001 | 2001 | USA | GA5 | Newman, R.M. et al. |
| KJ627709 | RSV-A/US/BID-V8491/2001 | 2001 | USA | GA5 | Newman, R.M. et al. |
| KJ627710 | RSV-A/US/BID-V8493/2001 | 2001 | USA | GA5 | Newman, R.M. et al. |
| KJ627717 | RSV-A/US/BID-V8509/2003 | 2001 | USA | GA5 | Newman, R.M. et al. |
| KJ627722 | RSV-A/US/BID-V8523/2004 | 2004 | USA | GA5 | Newman, R.M. et al. |
| KJ627725 | RSV-A/US/BID-V8526/2004 | 2004 | USA | GA5 | Newman, R.M. et al. |

---



**Supplementary Table S1** (continued). Strains used in this study.

| GenBank accession No. | Strain                                    | Collection year | Country  | Genotype | References or authorship |
|-----------------------|-------------------------------------------|-----------------|----------|----------|--------------------------|
| KJ627729              | RSV-A/US/BID-V8537/2003                   | 2003            | USA      | GA5      | Newman, R.M. et al.      |
| KJ627731              | RSV-A/US/BID-V8540/2003                   | 2003            | USA      | GA5      | Newman, R.M. et al.      |
| KJ627733              | RSV-A/US/BID-V8547/2003                   | 2003            | USA      | GA5      | Newman, R.M. et al.      |
| KJ641590              | RSV-A/US/BID-V9458/2012                   | 2012            | USA      | GA5      | Newman, R.M. et al.      |
| KJ643492              | RSV-A/US/BID-V9411/2013                   | 2013            | USA      | GA5      | Newman, R.M. et al.      |
| KJ643493              | RSV-A/US/BID-V9412/2013                   | 2013            | USA      | GA5      | Newman, R.M. et al.      |
| KJ643498              | RSV-A/US/BID-V9419/2013                   | 2013            | USA      | GA5      | Newman, R.M. et al.      |
| KJ643504              | RSV-A/US/BID-V9427/2013                   | 2013            | USA      | GA5      | Newman, R.M. et al.      |
| KJ643529              | RSV-A/US/BID-V9463/2013                   | 2013            | USA      | GA5      | Newman, R.M. et al.      |
| KJ643548              | RSV-A/US/BID-V9489/2013                   | 2013            | USA      | GA5      | Newman, R.M. et al.      |
| KJ643560              | RSV-A/US/BID-V9507/2013                   | 2013            | USA      | GA5      | Newman, R.M. et al.      |
| KJ643561              | RSV-A/US/BID-V9510/2013                   | 2013            | USA      | GA5      | Newman, R.M. et al.      |
| KJ643585              | RSV-A/US/BID-V9553/2013                   | 2013            | USA      | GA5      | Newman, R.M. et al.      |
| KJ643586              | RSV-A/US/BID-V9554/2013                   | 2013            | USA      | GA5      | Newman, R.M. et al.      |
| KJ672462              | RSVA/Homo sapiens/USA/LA2_84/2013         | 2013            | USA      | GA5      | Das, S. et al.           |
| KJ672474              | RSVA/Homo sapiens/USA/LA2_38/2012         | 2012            | USA      | GA5      | Das, S. et al.           |
| KJ672479              | RSVA/Homo sapiens/USA/LA2_18/2013         | 2013            | USA      | GA5      | Das, S. et al.           |
| KJ672483              | RSVA/Homo sapiens/USA/LA2_19/2013         | 2013            | USA      | GA5      | Das, S. et al.           |
| KJ723462              | RSVA/Homo sapiens/USA/92I-068A-01/1992    | 1992            | USA      | GA5      | Das, S. et al.           |
| KJ723465              | RSVA/Homo sapiens/USA/92I-094A-01/1992    | 1992            | USA      | GA5      | Das, S. et al.           |
| KJ723473              | RSVA/Homo sapiens/USA/90I-229A-01/1990    | 1990            | USA      | GA5      | Das, S. et al.           |
| KJ723490              | RSVA/Homo sapiens/USA/92I-048A-01/1992    | 1992            | USA      | GA5      | Das, S. et al.           |
| KJ939943              | VN-360-6/10                               | 2010            | Viet Nam | GA5      | 11                       |
| KJ939948              | VN-391-7/10                               | 2010            | Viet Nam | GA5      | 11                       |
| KP258701              | RSVA/Homo sapiens/USA/94E-014-01/1994     | 1994            | USA      | GA5      | Das, S.R. et al.         |
| KP258703              | RSVA/Homo sapiens/USA/97I-009A-01/1997    | 1997            | USA      | GA5      | Das, S.R. et al.         |
| KP258707              | RSVA/Homo sapiens/USA/95P-047-01/1995     | 1995            | USA      | GA5      | Das, S.R. et al.         |
| KP258710              | RSVA/Homo sapiens/USA/91E-611-01/1991     | 1991            | USA      | GA5      | Das, S.R. et al.         |
| KP258722              | RSVA/Homo sapiens/USA/93E-014-01/1993     | 1993            | USA      | GA5      | Das, S.R. et al.         |
| KP258726              | RSVA/Homo sapiens/USA/96E-128-01/1996     | 1996            | USA      | GA5      | Das, S.R. et al.         |
| KP258727              | RSVA/Homo sapiens/USA/97E-101-01/1997     | 1997            | USA      | GA5      | Das, S.R. et al.         |
| KP258728              | RSVA/Homo sapiens/USA/92E-024-01/1992     | 1992            | USA      | GA5      | Das, S.R. et al.         |
| KP258732              | RSVA/Homo sapiens/USA/91E-597-01/1991     | 1991            | USA      | GA5      | Das, S.R. et al.         |
| KP258740              | RSVA/Homo sapiens/USA/93E-065-01/1993     | 1993            | USA      | GA5      | Das, S.R. et al.         |
| KP317949              | Kilifi_11866_65_RSVA_2003                 | 2003            | Kenya    | GA5      | 5                        |
| KP317956              | Kilifi_11865_75_RSVA_2004                 | 2004            | Kenya    | GA5      | 5                        |
| KU316096              | RSVA/Homo sapiens/USA/96E-016-01/1996     | 1996            | USA      | GA5      | Das, S.R. et al.         |
| KU316104              | RSVA/Homo sapiens/USA/91P-516-01/1991     | 1991            | USA      | GA5      | Das, S.R. et al.         |
| KU316121              | RSVA/Homo sapiens/USA/92E-015-01/1992     | 1992            | USA      | GA5      | Das, S.R. et al.         |
| KU316145              | RSVA/Homo sapiens/USA/96E-033-01/1996     | 1996            | USA      | GA5      | Das, S.R. et al.         |
| KU316176              | RSVA/Homo sapiens/USA/90I-184A-01-01/1990 | 1990            | USA      | GA5      | Das, S.R. et al.         |
| KU316180              | RSVA/Homo sapiens/USA/98E-415-01/1998     | 1998            | USA      | GA5      | Das, S.R. et al.         |
| KU950473              | RSVA/Homo sapiens/USA/TH_10346/2012       | 2012            | USA      | GA5      | Das, S.R. et al.         |
| KU950479              | RSVA/Homo sapiens/USA/TH_10180/2012       | 2012            | USA      | GA5      | Das, S.R. et al.         |
| KU950487              | RSVA/Homo sapiens/USA/TH_10334/2012       | 2012            | USA      | GA5      | Das, S.R. et al.         |
| KU950501              | RSVA/Homo sapiens/USA/TH_10212/2013       | 2013            | USA      | GA5      | Das, S.R. et al.         |
| KU950561              | RSVB/Homo sapiens/USA/TH_10667/2006       | 2006            | USA      | GA5      | Das, S.R. et al.         |
| KU950564              | RSVA/Homo sapiens/USA/TH_10234/2012       | 2012            | USA      | GA5      | Das, S.R. et al.         |
| KU950616              | RSVA/Homo sapiens/USA/TH_10226/2012       | 2012            | USA      | GA5      | Das, S.R. et al.         |

---

|          |                                    |      |             |     |                        |
|----------|------------------------------------|------|-------------|-----|------------------------|
| KX765891 | RSVA/Homo sapiens/NZL/LJRSV44/2013 | 2013 | New Zealand | GA5 | Shabman, R. et al.     |
| KX765933 | RSVA/Homo sapiens/NZL/LJRSV58/2012 | 2012 | New Zealand | GA5 | Shabman, R. et al.     |
| KY296713 | BJ_08-04                           | 2005 | China       | GA5 | 9                      |
| KY296716 | BJ_09-55                           | 2005 | China       | GA5 | 9                      |
| KY296767 | HuN13-10                           | 2013 | China       | GA5 | 9                      |
| KY967364 | SC2632                             | 2015 | USA         | GA5 | Greninger, A.L. et al. |
| LC337813 | HRSV/Yokohama.JPN/V11519/1993      | 1993 | Japan       | GA5 | Saikusa, M. et al.     |
| LC337814 | HRSV/Yokohama.JPN/V12340/1995      | 1995 | Japan       | GA5 | Saikusa, M. et al.     |
| LC337815 | HRSV/Yokohama.JPN/V12391/1995      | 1995 | Japan       | GA5 | Saikusa, M. et al.     |
| LC337834 | HRSV/Yokohama.JPN/P74/1999         | 1999 | Japan       | GA5 | Saikusa, M. et al.     |

---

**Supplementary Table S1** (continued). Strains used in this study.

| GenBank accession No. | Strain                                    | Collection year | Country   | Genotype | References or authorship |
|-----------------------|-------------------------------------------|-----------------|-----------|----------|--------------------------|
| LC337835              | HRSV/Yokohama.JPN/P121/1999               | 1999            | Japan     | GA5      | Saikusa, M. et al.       |
| LC337838              | HRSV/Yokohama.JPN/P182/1999               | 1999            | Japan     | GA5      | Saikusa, M. et al.       |
| LC337845              | HRSV/Yokohama.JPN/P208/1999               | 1999            | Japan     | GA5      | Saikusa, M. et al.       |
| LC337847              | HRSV/Yokohama.JPN/P225/2000               | 2000            | Japan     | GA5      | Saikusa, M. et al.       |
| LC337848              | HRSV/Yokohama.JPN/P302/2000               | 2000            | Japan     | GA5      | Saikusa, M. et al.       |
| LC337849              | HRSV/Yokohama.JPN/P337/2000               | 2000            | Japan     | GA5      | Saikusa, M. et al.       |
| LC337850              | HRSV/Yokohama.JPN/P841/2000               | 2000            | Japan     | GA5      | Saikusa, M. et al.       |
| LC337852              | HRSV/Yokohama.JPN/P881/2000               | 2000            | Japan     | GA5      | Saikusa, M. et al.       |
| LC337855              | HRSV/Yokohama.JPN/P909/2000               | 2000            | Japan     | GA5      | Saikusa, M. et al.       |
| LC337856              | HRSV/Yokohama.JPN/P936/2001               | 2001            | Japan     | GA5      | Saikusa, M. et al.       |
| LC337859              | HRSV/Yokohama.JPN/P1255/2001              | 2001            | Japan     | GA5      | Saikusa, M. et al.       |
| LC337860              | HRSV/Yokohama.JPN/P1298/2001              | 2001            | Japan     | GA5      | Saikusa, M. et al.       |
| LC337864              | HRSV/Yokohama.JPN/P1361/2001              | 2001            | Japan     | GA5      | Saikusa, M. et al.       |
| LC337867              | HRSV/Yokohama.JPN/P1371/2001              | 2001            | Japan     | GA5      | Saikusa, M. et al.       |
| LC337868              | HRSV/Yokohama.JPN/P1376/2001              | 2001            | Japan     | GA5      | Saikusa, M. et al.       |
| LC337871              | HRSV/Yokohama.JPN/P1401/2001              | 2001            | Japan     | GA5      | Saikusa, M. et al.       |
| LC337873              | HRSV/Yokohama.JPN/P1407/2001              | 2001            | Japan     | GA5      | Saikusa, M. et al.       |
| LC337874              | HRSV/Yokohama.JPN/P1416/2001              | 2001            | Japan     | GA5      | Saikusa, M. et al.       |
| LC337876              | HRSV/Yokohama.JPN/P1426/2001              | 2001            | Japan     | GA5      | Saikusa, M. et al.       |
| LC337877              | HRSV/Yokohama.JPN/P1427/2001              | 2001            | Japan     | GA5      | Saikusa, M. et al.       |
| LC337884              | HRSV/Yokohama.JPN/P1451/2001              | 2001            | Japan     | GA5      | Saikusa, M. et al.       |
| LC337885              | HRSV/Yokohama.JPN/P1452/2001              | 2001            | Japan     | GA5      | Saikusa, M. et al.       |
| LC337887              | HRSV/Yokohama.JPN/P1891/2002              | 2002            | Japan     | GA5      | Saikusa, M. et al.       |
| LC337888              | HRSV/Yokohama.JPN/P1905/2002              | 2002            | Japan     | GA5      | Saikusa, M. et al.       |
| LC337890              | HRSV/Yokohama.JPN/P1924/2002              | 2002            | Japan     | GA5      | Saikusa, M. et al.       |
| LC337891              | HRSV/Yokohama.JPN/P2037/2003              | 2003            | Japan     | GA5      | Saikusa, M. et al.       |
| LC337893              | HRSV/Yokohama.JPN/P2710/2004              | 2004            | Japan     | GA5      | Saikusa, M. et al.       |
| LC337903              | HRSV/Yokohama.JPN/P2769/2004              | 2004            | Japan     | GA5      | Saikusa, M. et al.       |
| LC337905              | HRSV/Yokohama.JPN/P2785/2004              | 2004            | Japan     | GA5      | Saikusa, M. et al.       |
| LC337906              | HRSV/Yokohama.JPN/P2790/2004              | 2004            | Japan     | GA5      | Saikusa, M. et al.       |
| LC337907              | HRSV/Yokohama.JPN/P2791/2004              | 2004            | Japan     | GA5      | Saikusa, M. et al.       |
| LC337909              | HRSV/Yokohama.JPN/P3151/2005              | 2005            | Japan     | GA5      | Saikusa, M. et al.       |
| LC365790              | HRSV/Yokohama.JPN/P4094/2007              | 2007            | Japan     | GA5      | Saikusa, M. et al.       |
| MF001038              | 1D1                                       | 2015            | USA       | GA5      | Greninger, A.L. et al.   |
| MF978512              | RSVA-CAP-9/BJ/2014                        | 2015            | China     | GA5      | 12                       |
| MF978625              | RSVA-WZ-131/ZJ/2015                       | 2015            | China     | GA5      | 12                       |
| MG027862              | RSV-A/US/BID-V8392/2003                   | 2003            | USA       | GA5      | Newman, R.M. et al.      |
| MG642048              | RSVA/Homo sapiens/USA/MCRSV_258/1990      | 1990            | USA       | GA5      | Shabman, R. et al.       |
| MG642052              | RSVA/Homo sapiens/USA/MCRSV_263/1994      | 1994            | USA       | GA5      | Shabman, R. et al.       |
| MG642055              | RSVA/Homo sapiens/USA/MCRSV_259/1990      | 1990            | USA       | GA5      | Shabman, R. et al.       |
| MG642061              | RSVA/Homo sapiens/USA/MCRSV_262/1994      | 1994            | USA       | GA5      | Shabman, R. et al.       |
| MH760599              | A/NSW/WM2955A/10                          | 2010            | Australia | GA5      | 13                       |
| KP258723              | RSVA/Homo sapiens/USA/86E-007-01/1986     | 1986            | USA       | GA6      | Das, S.R. et al.         |
| KP258733              | RSVA/Homo sapiens/USA/84E-004-01/1984     | 1984            | USA       | GA6      | Das, S.R. et al.         |
| KU316125              | RSVA/Homo sapiens/USA/84I-266A-01-01/1984 | 1984            | USA       | GA6      | Das, S.R. et al.         |
| KU316138              | RSVA/Homo sapiens/USA/87E-083-01/1987     | 1987            | USA       | GA6      | Das, S.R. et al.         |
| MG642063              | RSVA/Homo sapiens/USA/MCRSV_226/1982      | 1982            | USA       | GA6      | Shabman, R. et al.       |
| MG642070              | RSVA/Homo sapiens/USA/MCRSV_247/1986      | 1986            | USA       | GA6      | Shabman, R. et al.       |
| JF920062              | A/WI/629-3248/98                          | 1998            | USA       | GA7      | 3                        |

---

|          |                                        |      |     |     |                    |
|----------|----------------------------------------|------|-----|-----|--------------------|
| JF920065 | A/WI/629-4071/98                       | 1998 | USA | GA7 | 3                  |
| JX069800 | RSVA/human/USA/A1997-12-35/1997        | 1997 | USA | GA7 | Lorenzi, H. et al. |
| JX069801 | RSVA/human/USA/A1998-03-02/1998        | 1998 | USA | GA7 | Lorenzi, H. et al. |
| JX198132 | TX-79303                               | 2005 | USA | GA7 | 1                  |
| KJ723464 | RSVA/Homo sapiens/USA/89I-150A-01/1989 | 1989 | USA | GA7 | Das, S.R. et al.   |
| KJ723492 | RSVA/Homo sapiens/USA/90I-226A-01/1990 | 1990 | USA | GA7 | Das, S.R. et al.   |
| KP258700 | RSVA/Homo sapiens/USA/85E-107-01/1985  | 1985 | USA | GA7 | Das, S.R. et al.   |
| KP258734 | RSVA/Homo sapiens/USA/89E-024-01/1989  | 1989 | USA | GA7 | Das, S.R. et al.   |
| KP258737 | RSVA/Homo sapiens/USA/84E-016-01/1984  | 1984 | USA | GA7 | Das, S.R. et al.   |
| KP258743 | RSVA/Homo sapiens/USA/98E-027-01/1998  | 1998 | USA | GA7 | Das, S.R. et al.   |

---

**Supplementary Table S1** (continued). Strains used in this study.

| GenBank accession No. | Strain                                    | Collection year | Country      | Genotype | References or authorship |
|-----------------------|-------------------------------------------|-----------------|--------------|----------|--------------------------|
| KU316092              | RSVA/Homo sapiens/USA/91E-610-01/1991     | 1991            | USA          | GA7      | Das, S.R. et al.         |
| KU316110              | RSVA/Homo sapiens/USA/84I-220A-01-01/1984 | 1984            | USA          | GA7      | Das, S.R. et al.         |
| KU316167              | RSVA/Homo sapiens/USA/85I-040A-01-01/1985 | 1985            | USA          | GA7      | Das, S.R. et al.         |
| LC337825              | HRSV/Yokohama.JPN/V14460/1997             | 1997            | Japan        | GA7      | Saikusa, M. et al.       |
| LC337827              | HRSV/Yokohama.JPN/V14761/1997             | 1997            | Japan        | GA7      | Saikusa, M. et al.       |
| LC337828              | HRSV/Yokohama.JPN/V14775/1997             | 1997            | Japan        | GA7      | Saikusa, M. et al.       |
| LC337831              | HRSV/Yokohama.JPN/V14824/1997             | 1997            | Japan        | GA7      | Saikusa, M. et al.       |
| LC337832              | HRSV/Yokohama.JPN/V14827/1997             | 1997            | Japan        | GA7      | Saikusa, M. et al.       |
| LC337836              | HRSV/Yokohama.JPN/P158/1999               | 1999            | Japan        | GA7      | Saikusa, M. et al.       |
| LC337839              | HRSV/Yokohama.JPN/P191/1999               | 1999            | Japan        | GA7      | Saikusa, M. et al.       |
| LC337841              | HRSV/Yokohama.JPN/P200/1999               | 1999            | Japan        | GA7      | Saikusa, M. et al.       |
| LC337843              | HRSV/Yokohama.JPN/P206/1999               | 1999            | Japan        | GA7      | Saikusa, M. et al.       |
| LC337844              | HRSV/Yokohama.JPN/P207/1999               | 1999            | Japan        | GA7      | Saikusa, M. et al.       |
| LC337851              | HRSV/Yokohama.JPN/P850/2000               | 2000            | Japan        | GA7      | Saikusa, M. et al.       |
| LC337853              | HRSV/Yokohama.JPN/P889/2000               | 2000            | Japan        | GA7      | Saikusa, M. et al.       |
| LC337857              | HRSV/Yokohama.JPN/P946/2001               | 2001            | Japan        | GA7      | Saikusa, M. et al.       |
| LC337889              | HRSV/Yokohama.JPN/P1919/2002              | 2002            | Japan        | GA7      | Saikusa, M. et al.       |
| LC337899              | HRSV/Yokohama.JPN/P2762/2004              | 2004            | Japan        | GA7      | Saikusa, M. et al.       |
| LC337900              | HRSV/Yokohama.JPN/P2765/2004              | 2004            | Japan        | GA7      | Saikusa, M. et al.       |
| LC337901              | HRSV/Yokohama.JPN/P2766/2004              | 2004            | Japan        | GA7      | Saikusa, M. et al.       |
| LC337916              | HRSV/Yokohama.JPN/P3233/2005              | 2005            | Japan        | GA7      | Saikusa, M. et al.       |
| MG642030              | RSVA/Homo sapiens/USA/MCRSV_256/1988      | 1988            | USA          | GA7      | Shabman, R. et al.       |
| MG642034              | RSVA/Homo sapiens/USA/MCRSV_244/1985      | 1985            | USA          | GA7      | Shabman, R. et al.       |
| AB848366              | BPH-12-069                                | 2012            | Philippines  | NA1      | Okamoto, M. et al.       |
| AB848369              | BPH-13-025                                | 2013            | Philippines  | NA1      | Okamoto, M. et al.       |
| AB848370              | ONP-12-144                                | 2012            | Philippines  | NA1      | Okamoto, M. et al.       |
| AB848371              | ONP-12-175                                | 2012            | Philippines  | NA1      | Okamoto, M. et al.       |
| AB848372              | ONP-12-188                                | 2012            | Philippines  | NA1      | Okamoto, M. et al.       |
| AB848373              | ONP-13-005                                | 2013            | Philippines  | NA1      | Okamoto, M. et al.       |
| AB848374              | ONP-13-008                                | 2013            | Philippines  | NA1      | Okamoto, M. et al.       |
| JF714709              | Riyadh 1/2008                             | 2008            | Saudi Arabia | NA1      | Farrag, M.A. et al.      |
| JF714710              | Riyadh 91/2009                            | 2009            | Saudi Arabia | NA1      | Farrag, M.A. et al.      |
| JF920046              | A/WI/629-2/07                             | 2007            | USA          | NA1      | 3                        |
| JF920047              | A/WI/629-23/08                            | 2008            | USA          | NA1      | 3                        |
| JF920048              | A/WI/629-9-2/07                           | 2007            | USA          | NA1      | 3                        |
| JF920049              | A/WI/629-22/07                            | 2007            | USA          | NA1      | 3                        |
| JF920054              | A/WI/629-Q0282/10                         | 2010            | USA          | NA1      | 3                        |
| JX015479              | 11-000271                                 | 2011            | Netherlands  | NA1      | 4                        |
| JX015481              | 09-000457                                 | 2009            | Netherlands  | NA1      | 4                        |
| JX015482              | BE06-6650                                 | 2006            | Belgium      | NA1      | 4                        |
| JX015483              | 08-047045                                 | 2008            | Netherlands  | NA1      | 4                        |
| JX015490              | RSV597                                    | 2007            | Netherlands  | NA1      | 4                        |
| JX015493              | 08-000507                                 | 2008            | Netherlands  | NA1      | 4                        |
| JX015494              | 08-001411                                 | 2008            | Netherlands  | NA1      | 4                        |
| JX015495              | 08-042544                                 | 2008            | Netherlands  | NA1      | 4                        |
| JX015496              | 08-042735                                 | 2008            | Netherlands  | NA1      | 4                        |
| JX015497              | 08-044640                                 | 2008            | Netherlands  | NA1      | 4                        |
| JX015498              | 08-046972                                 | 2008            | Netherlands  | NA1      | 4                        |
| JX015499              | BE08-5146                                 | 2008            | Belgium      | NA1      | 4                        |

---

|          |                 |      |       |     |   |
|----------|-----------------|------|-------|-----|---|
| JX482019 | CQ_Jan-2012(8)  | 2012 | China | NA1 | 7 |
| JX482020 | CQ_Jan-2012(4)  | 2012 | China | NA1 | 7 |
| JX482021 | CQ_Jan-2012(19) | 2012 | China | NA1 | 7 |
| JX482022 | CQ_Jan-2012(18) | 2012 | China | NA1 | 7 |
| JX482023 | CQ_Jan-2012(15) | 2012 | China | NA1 | 7 |
| JX482024 | CQ_Jan-2012(14) | 2012 | China | NA1 | 7 |
| JX482025 | CQ_Jan-2012(13) | 2012 | China | NA1 | 7 |
| JX482026 | CQ_Jan-2012(12) | 2012 | China | NA1 | 7 |
| JX482027 | CQ_Jan-2012(11) | 2012 | China | NA1 | 7 |
| JX482028 | CQ_Jan-2012(10) | 2012 | China | NA1 | 7 |

---

**Supplementary Table S1** (continued). Strains used in this study.

| GenBank accession No. | Strain           | Collection year | Country     | Genotype | References or authorship |
|-----------------------|------------------|-----------------|-------------|----------|--------------------------|
| JX482029              | CQ_Jan-2012(1)   | 2012            | China       | NA1      | 7                        |
| JX482030              | CQ_Dec-2011(27)  | 2011            | China       | NA1      | 7                        |
| JX482031              | CQ_Dec-2011(25)  | 2011            | China       | NA1      | 7                        |
| JX482032              | CQ_Dec-2011(23)  | 2011            | China       | NA1      | 7                        |
| JX482034              | CQ_Dec-2011(21)  | 2011            | China       | NA1      | 7                        |
| JX482035              | CQ_Dec-2011(18)  | 2011            | China       | NA1      | 7                        |
| JX482036              | CQ_Dec-2011(17)  | 2011            | China       | NA1      | 7                        |
| JX482037              | CQ_Dec-2011(16)  | 2011            | China       | NA1      | 7                        |
| JX482038              | CQ_Dec-2011(15)  | 2011            | China       | NA1      | 7                        |
| JX627336              | RSVA/GN435/11    | 2011            | South Korea | NA1      | 14                       |
| JX682715              | CQ_Mar-2012/3163 | 2012            | China       | NA1      | 7                        |
| JX682717              | CQ_Mar-2012/3174 | 2012            | China       | NA1      | 7                        |
| JX682718              | CQ_Apr-2012/3229 | 2012            | China       | NA1      | 7                        |
| JX682719              | CQ_Oct-2011/2251 | 2011            | China       | NA1      | 7                        |
| JX682720              | CQ_Oct-2011/2310 | 2011            | China       | NA1      | 7                        |
| JX682721              | CQ_Oct-2011/2315 | 2011            | China       | NA1      | 7                        |
| JX682722              | CQ_Oct-2011/2319 | 2011            | China       | NA1      | 7                        |
| JX682723              | CQ_Nov-2011/2348 | 2011            | China       | NA1      | 7                        |
| JX682724              | CQ_Nov-2011/2353 | 2011            | China       | NA1      | 7                        |
| JX682726              | CQ_Dec-2011/2580 | 2011            | China       | NA1      | 7                        |
| JX682727              | CQ_Dec-2011/2587 | 2011            | China       | NA1      | 7                        |
| JX682733              | CQ_Jan-2012/2792 | 2012            | China       | NA1      | 7                        |
| JX682734              | CQ_Jan-2012/2848 | 2012            | China       | NA1      | 7                        |
| JX682735              | CQ_Jan-2012/2881 | 2012            | China       | NA1      | 7                        |
| JX682736              | CQ_Jan-2012/2904 | 2012            | China       | NA1      | 7                        |
| JX682737              | CQ_Jan-2012/2907 | 2012            | China       | NA1      | 7                        |
| JX682738              | CQ_Jan-2012/2947 | 2012            | China       | NA1      | 7                        |
| JX682739              | CQ_Feb-2012/2992 | 2012            | China       | NA1      | 7                        |
| JX682740              | CQ_Sep-2010/857  | 2012            | China       | NA1      | 7                        |
| JX682741              | CQ_Oct-2010/996  | 2010            | China       | NA1      | 7                        |
| JX682744              | CQ_Dec-2010/1146 | 2010            | China       | NA1      | 7                        |
| JX682746              | CQ_Dec-2010/1178 | 2010            | China       | NA1      | 7                        |
| JX682749              | CQ_Dec-2010/1200 | 2010            | China       | NA1      | 7                        |
| JX682751              | CQ_Jan-2011/1231 | 2011            | China       | NA1      | 7                        |
| JX682752              | CQ_Jan-2011/1275 | 2011            | China       | NA1      | 7                        |
| JX682753              | CQ_Jan-2011/1282 | 2011            | China       | NA1      | 7                        |
| JX682754              | CQ_Feb-2011/1366 | 2011            | China       | NA1      | 7                        |
| JX682756              | CQ_Feb-2011/1373 | 2011            | China       | NA1      | 7                        |
| JX682757              | CQ_Feb-2011/1399 | 2011            | China       | NA1      | 7                        |
| JX682758              | CQ_Mar-2011/1434 | 2011            | China       | NA1      | 7                        |
| JX682759              | CQ_Mar-2011/1437 | 2011            | China       | NA1      | 7                        |
| JX682760              | CQ_Mar-2011/1442 | 2011            | China       | NA1      | 7                        |
| JX682762              | CQ_Mar-2011/1455 | 2011            | China       | NA1      | 7                        |
| JX682763              | CQ_Mar-2011/1465 | 2011            | China       | NA1      | 7                        |
| JX682766              | CQ_Apr-2011/1555 | 2011            | China       | NA1      | 7                        |
| JX682767              | CQ_Apr-2011/1642 | 2011            | China       | NA1      | 7                        |
| JX682768              | CQ_Apr-2011/1643 | 2011            | China       | NA1      | 7                        |
| JX682769              | CQ_May-2011/1685 | 2011            | China       | NA1      | 7                        |
| JX682770              | CQ_May-2011/1712 | 2011            | China       | NA1      | 7                        |

---

|          |                  |      |       |     |   |
|----------|------------------|------|-------|-----|---|
| JX682772 | CQ_May-2011/1748 | 2011 | China | NA1 | 7 |
| JX682773 | CQ_May-2011/1762 | 2011 | China | NA1 | 7 |
| JX682774 | CQ_Jun-2011/1795 | 2011 | China | NA1 | 7 |
| JX682775 | CQ_Jun-2011/1827 | 2011 | China | NA1 | 7 |
| JX682777 | CQ_Jun-2011/1868 | 2011 | China | NA1 | 7 |
| JX682778 | CQ_Jul-2011/1920 | 2011 | China | NA1 | 7 |
| JX682779 | CQ_Jul-2011/1925 | 2011 | China | NA1 | 7 |
| JX682781 | CQ_Jul-2011/1940 | 2011 | China | NA1 | 7 |
| JX682782 | CQ_Sep-2011/2111 | 2011 | China | NA1 | 7 |
| JX682783 | CQ_Sep-2011/2118 | 2011 | China | NA1 | 7 |

---



**Supplementary Table S1** (continued). Strains used in this study.

| GenBank accession No. | Strain                                 | Collection year | Country   | Genotype | References or authorship |
|-----------------------|----------------------------------------|-----------------|-----------|----------|--------------------------|
| JX682784              | CQ_Sep-2011/2147                       | 2011            | China     | NA1      | 7                        |
| JX682785              | CQ_Oct-2011/2208                       | 2011            | China     | NA1      | 7                        |
| JX682789              | CQ_Oct-2011/2247                       | 2011            | China     | NA1      | 7                        |
| JX682790              | CQ_Nov-2011/2362                       | 2011            | China     | NA1      | 7                        |
| JX682791              | CQ_Nov-2011/2379                       | 2011            | China     | NA1      | 7                        |
| JX682792              | CQ_Nov-2011/2384                       | 2011            | China     | NA1      | 7                        |
| JX682795              | CQ_Dec-2011/2626                       | 2011            | China     | NA1      | 7                        |
| JX682796              | CQ_Dec-2011/2627                       | 2011            | China     | NA1      | 7                        |
| JX682797              | CQ_Dec-2011/2628                       | 2011            | China     | NA1      | 7                        |
| KC618408              | 9393                                   | 2007            | Italy     | NA1      | Piralla, A. et al.       |
| KC618409              | 9395                                   | 2007            | Italy     | NA1      | Piralla, A. et al.       |
| KC618410              | 9830                                   | 2009            | Italy     | NA1      | Piralla, A. et al.       |
| KC731482              | RSV-A/NIV1114046/11                    | 2011            | India     | NA1      | 15                       |
| KC731483              | RSV-A/NIV1114073/11                    | 2011            | India     | NA1      | 15                       |
| KC978856              | A/Chongqing/13-73/11.or                | 2011            | China     | NA1      | 16                       |
| KF530261              | RSVA/Homo sapiens/DEU/106/2008         | 2008            | Germany   | NA1      | Lorenzi, H. et al.       |
| KF530269              | RSVA/Hep2_lab/USA/629-Q0030_RSV60/2009 | 2009            | USA       | NA1      | Lorenzi, H. et al.       |
| KF826817              | RSVA/Homo sapiens/MEX/43/2009          | 2009            | Mexico    | NA1      | Lorenzi, H. et al.       |
| KF826830              | RSVA/Homo sapiens/DEU/107/2009         | 2009            | Germany   | NA1      | Lorenzi, H. et al.       |
| KF826831              | RSVA/Homo sapiens/DEU/108/2009         | 2009            | Germany   | NA1      | Lorenzi, H. et al.       |
| KF826833              | RSVA/Homo sapiens/ITA/121/2009         | 2009            | Italy     | NA1      | Lorenzi, H. et al.       |
| KF826838              | RSVA/Homo sapiens/ARG/177/2006         | 2006            | Argentina | NA1      | Lorenzi, H. et al.       |
| KF826840              | RSVA/Homo sapiens/MEX/29/2007          | 2007            | Mexico    | NA1      | Lorenzi, H. et al.       |
| KF826849              | RSVA/Hep2_lab/USA/629-Q0115_RSV89/2010 | 2010            | USA       | NA1      | Lorenzi, H. et al.       |
| KF826855              | RSVA/Homo sapiens/ITA/123/2009         | 2009            | Italy     | NA1      | Lorenzi, H. et al.       |
| KF826856              | RSVA/Homo sapiens/ITA/125/2009         | 2009            | Italy     | NA1      | Lorenzi, H. et al.       |
| KJ130649              | CQ_Nov-2012/3998                       | 2012            | China     | NA1      | 17                       |
| KJ130651              | CQ_Jan-2013/4219                       | 2013            | China     | NA1      | 17                       |
| KJ130653              | CQ_May-2013/4945                       | 2013            | China     | NA1      | 17                       |
| KJ627250              | RSVA/Homo sapiens/PER/FLI1381/2010     | 2010            | Peru      | NA1      | Wentworth, D.E. et al.   |
| KJ627253              | RSVA/Homo sapiens/PER/FLE3832/2009     | 2009            | Peru      | NA1      | Wentworth, D.E. et al.   |
| KJ627257              | RSVA/Homo sapiens/PER/FLA5809/2009     | 2009            | Peru      | NA1      | Wentworth, D.E. et al.   |
| KJ627258              | RSVA/Homo sapiens/PER/FLE9486/2010     | 2010            | Peru      | NA1      | Wentworth, D.E. et al.   |
| KJ627259              | RSVA/Homo sapiens/PER/FPI01734/2011    | 2011            | Peru      | NA1      | Wentworth, D.E. et al.   |
| KJ627264              | RSVA/Homo sapiens/PER/IPE01270/2012    | 2012            | Peru      | NA1      | Wentworth, D.E. et al.   |
| KJ627266              | RSVA/Homo sapiens/PER/FLA6730/2009     | 2009            | Peru      | NA1      | Wentworth, D.E. et al.   |
| KJ627271              | RSVA/Homo sapiens/PER/FLE0433/2009     | 2009            | Peru      | NA1      | Wentworth, D.E. et al.   |
| KJ627272              | RSVA/Homo sapiens/PER/FLA6795/2009     | 2009            | Peru      | NA1      | Wentworth, D.E. et al.   |
| KJ627274              | RSVA/Homo sapiens/PER/FLA6534/2009     | 2009            | Peru      | NA1      | Wentworth, D.E. et al.   |
| KJ627275              | RSVA/Homo sapiens/PER/FLE9863/2010     | 2010            | Peru      | NA1      | Wentworth, D.E. et al.   |
| KJ627282              | RSVA/Homo sapiens/PER/FLA6623/2009     | 2009            | Peru      | NA1      | Wentworth, D.E. et al.   |
| KJ627286              | RSVA/Homo sapiens/PER/FLA6646/2009     | 2009            | Peru      | NA1      | Wentworth, D.E. et al.   |
| KJ627288              | RSVA/Homo sapiens/PER/FLA7778/2009     | 2009            | Peru      | NA1      | Wentworth, D.E. et al.   |
| KJ627293              | RSVA/Homo sapiens/PER/FLA7768/2009     | 2009            | Peru      | NA1      | Wentworth, D.E. et al.   |
| KJ627294              | RSVA/Homo sapiens/PER/FLE9761/2010     | 2010            | Peru      | NA1      | Wentworth, D.E. et al.   |
| KJ627296              | RSVA/Homo sapiens/PER/FLE9488/2010     | 2010            | Peru      | NA1      | Wentworth, D.E. et al.   |
| KJ627300              | RSVA/Homo sapiens/PER/FLA7447/2009     | 2009            | Peru      | NA1      | Wentworth, D.E. et al.   |
| KJ627307              | RSVA/Homo sapiens/PER/FLE9867/2010     | 2010            | Peru      | NA1      | Wentworth, D.E. et al.   |
| KJ627308              | RSVA/Homo sapiens/PER/FLE8972/2010     | 2010            | Peru      | NA1      | Wentworth, D.E. et al.   |

---

|          |                                    |      |      |     |                        |
|----------|------------------------------------|------|------|-----|------------------------|
| KJ627312 | RSVA/Homo sapiens/PER/FLE9996/2010 | 2010 | Peru | NA1 | Wentworth, D.E. et al. |
| KJ627315 | RSVA/Homo sapiens/PER/FLA7756/2009 | 2009 | Peru | NA1 | Wentworth, D.E. et al. |
| KJ627316 | RSVA/Homo sapiens/PER/FLE9593/2010 | 2010 | Peru | NA1 | Wentworth, D.E. et al. |
| KJ627318 | RSVA/Homo sapiens/PER/FLA6745/2009 | 2009 | Peru | NA1 | Wentworth, D.E. et al. |
| KJ627320 | RSVA/Homo sapiens/PER/FLE9490/2010 | 2010 | Peru | NA1 | Wentworth, D.E. et al. |
| KJ627322 | RSVA/Homo sapiens/PER/FLA6536/2009 | 2009 | Peru | NA1 | Wentworth, D.E. et al. |
| KJ627325 | RSVA/Homo sapiens/PER/FLE8626/2010 | 2010 | Peru | NA1 | Wentworth, D.E. et al. |
| KJ627328 | RSVA/Homo sapiens/PER/FLI1310/2010 | 2010 | Peru | NA1 | Wentworth, D.E. et al. |
| KJ627333 | RSVA/Homo sapiens/PER/FLE8485/2010 | 2010 | Peru | NA1 | Wentworth, D.E. et al. |
| KJ627334 | RSVA/Homo sapiens/PER/FLI2436/2010 | 2010 | Peru | NA1 | Wentworth, D.E. et al. |

---

**Supplementary Table S1** (continued). Strains used in this study.

| GenBank accession No. | Strain                              | Collection year | Country  | Genotype | References or authorship |
|-----------------------|-------------------------------------|-----------------|----------|----------|--------------------------|
| KJ627337              | RSVA/Homo sapiens/PER/FLA7776/2009  | 2009            | Peru     | NA1      | Wentworth, D.E. et al.   |
| KJ627338              | RSVA/Homo sapiens/PER/FLA7437/2009  | 2009            | Peru     | NA1      | Wentworth, D.E. et al.   |
| KJ627344              | RSVA/Homo sapiens/PER/FLA6900/2009  | 2009            | Peru     | NA1      | Wentworth, D.E. et al.   |
| KJ627349              | RSVA/Homo sapiens/PER/FLE4190/2009  | 2009            | Peru     | NA1      | Wentworth, D.E. et al.   |
| KJ627350              | RSVA/Homo sapiens/PER/FLA6714/2009  | 2009            | Peru     | NA1      | Wentworth, D.E. et al.   |
| KJ627351              | RSVA/Homo sapiens/PER/FPP00421/2011 | 2011            | Peru     | NA1      | Wentworth, D.E. et al.   |
| KJ627354              | RSVA/Homo sapiens/PER/FLA6683/2009  | 2009            | Peru     | NA1      | Wentworth, D.E. et al.   |
| KJ627355              | RSVA/Homo sapiens/PER/FLE8228/2010  | 2010            | Peru     | NA1      | Wentworth, D.E. et al.   |
| KJ627360              | RSVA/Homo sapiens/PER/FLA7449/2009  | 2009            | Peru     | NA1      | Wentworth, D.E. et al.   |
| KJ627370              | RSVA/Homo sapiens/PER/FPP00538/2011 | 2011            | Peru     | NA1      | Wentworth, D.E. et al.   |
| KJ627371              | RSVA/Homo sapiens/PER/FLE9518/2010  | 2010            | Peru     | NA1      | Wentworth, D.E. et al.   |
| KJ627372              | RSVA/Homo sapiens/PER/FLE8161/2010  | 2010            | Peru     | NA1      | Wentworth, D.E. et al.   |
| KJ627373              | RSVA/Homo sapiens/PER/FLA7446/2009  | 2009            | Peru     | NA1      | Wentworth, D.E. et al.   |
| KJ627374              | RSVA/Homo sapiens/PER/FPP00438/2011 | 2011            | Peru     | NA1      | Wentworth, D.E. et al.   |
| KJ627737              | RSV-A/US/BID-V8725/2013             | 2013            | USA      | NA1      | Newman, R.M. et al.      |
| KJ672424              | RSVA/Homo sapiens/USA/LA2_106/2012  | 2012            | USA      | NA1      | Das, S. et al.           |
| KJ672427              | RSVA/Homo sapiens/USA/LA2_09/2012   | 2012            | USA      | NA1      | Das, S. et al.           |
| KJ672428              | RSVA/Homo sapiens/USA/LA2_55/2013   | 2013            | USA      | NA1      | Das, S. et al.           |
| KJ672431              | RSVA/Homo sapiens/USA/LA2_14/2012   | 2012            | USA      | NA1      | Das, S. et al.           |
| KJ672432              | RSVA/Homo sapiens/USA/LA2_72/2013   | 2013            | USA      | NA1      | Das, S. et al.           |
| KJ672433              | RSVA/Homo sapiens/USA/LA2_95/2013   | 2013            | USA      | NA1      | Das, S. et al.           |
| KJ672436              | RSVA/Homo sapiens/USA/LA2_30/2012   | 2012            | USA      | NA1      | Das, S. et al.           |
| KJ672440              | RSVA/Homo sapiens/USA/LA2_22/2012   | 2012            | USA      | NA1      | Das, S. et al.           |
| KJ672441              | RSVA/Homo sapiens/USA/LA2_87/2013   | 2013            | USA      | NA1      | Das, S. et al.           |
| KJ672442              | RSVA/Homo sapiens/USA/LA2_45/2013   | 2013            | USA      | NA1      | Das, S. et al.           |
| KJ672443              | RSVA/Homo sapiens/USA/LA2_21/2013   | 2013            | USA      | NA1      | Das, S. et al.           |
| KJ672444              | RSVA/Homo sapiens/USA/LA2_11/2012   | 2012            | USA      | NA1      | Das, S. et al.           |
| KJ672448              | RSVA/Homo sapiens/USA/LA2_74/2013   | 2013            | USA      | NA1      | Das, S. et al.           |
| KJ672449              | RSVA/Homo sapiens/USA/LA2_28/2012   | 2012            | USA      | NA1      | Das, S. et al.           |
| KJ672454              | RSVA/Homo sapiens/USA/LA2_73/2013   | 2013            | USA      | NA1      | Das, S. et al.           |
| KJ672455              | RSVA/Homo sapiens/USA/LA2_05/2012   | 2012            | USA      | NA1      | Das, S. et al.           |
| KJ672458              | RSVA/Homo sapiens/USA/LA2_77/2013   | 2013            | USA      | NA1      | Das, S. et al.           |
| KJ672459              | RSVA/Homo sapiens/USA/LA2_60/2013   | 2013            | USA      | NA1      | Das, S. et al.           |
| KJ672464              | RSVA/Homo sapiens/USA/LA2_04/2012   | 2012            | USA      | NA1      | Das, S. et al.           |
| KJ672465              | RSVA/Homo sapiens/USA/LA2_13/2012   | 2012            | USA      | NA1      | Das, S. et al.           |
| KJ672469              | RSVA/Homo sapiens/USA/LA2_44/2013   | 2013            | USA      | NA1      | Das, S. et al.           |
| KJ672471              | RSVA/Homo sapiens/USA/LA2_85/2013   | 2013            | USA      | NA1      | Das, S. et al.           |
| KJ672472              | RSVA/Homo sapiens/USA/LA2_15/2012   | 2012            | USA      | NA1      | Das, S. et al.           |
| KJ672475              | RSVA/Homo sapiens/USA/LA2_17/2013   | 2013            | USA      | NA1      | Das, S. et al.           |
| KJ672478              | RSVA/Homo sapiens/USA/LA2_29/2013   | 2013            | USA      | NA1      | Das, S. et al.           |
| KJ672480              | RSVA/Homo sapiens/USA/LA2_62/2013   | 2013            | USA      | NA1      | Das, S. et al.           |
| KJ672482              | RSVA/Homo sapiens/USA/LA2_41/2012   | 2012            | USA      | NA1      | Das, S. et al.           |
| KJ939936              | VN-120-7/09                         | 2009            | Viet Nam | NA1      | 11                       |
| KJ939939              | VN-168-10/09                        | 2009            | Viet Nam | NA1      | 11                       |
| KJ939940              | VN-217-12/09                        | 2009            | Viet Nam | NA1      | 11                       |
| KJ939942              | VN-356-6/10                         | 2010            | Viet Nam | NA1      | 11                       |
| KJ939945              | VN-372-6/10                         | 2010            | Viet Nam | NA1      | 11                       |
| KJ939946              | VN-378-7/10                         | 2010            | Viet Nam | NA1      | 11                       |
| KJ939949              | VN-525-3/10                         | 2010            | Viet Nam | NA1      | 11                       |

---

|          |              |      |          |     |    |
|----------|--------------|------|----------|-----|----|
| KJ939950 | VN-587-7/10  | 2010 | Viet Nam | NA1 | 11 |
| KJ939951 | VN-733-10/09 | 2009 | Viet Nam | NA1 | 11 |
| KJ939961 | VN-794-7/10  | 2010 | Viet Nam | NA1 | 11 |
| KJ939963 | VN-808-8/10  | 2010 | Viet Nam | NA1 | 11 |
| KJ939964 | VN-816-8/10  | 2010 | Viet Nam | NA1 | 11 |
| KJ939965 | VN-820-8/10  | 2010 | Viet Nam | NA1 | 11 |
| KJ939966 | VN-824-9/10  | 2010 | Viet Nam | NA1 | 11 |
| KJ939967 | VN-832-9/10  | 2010 | Viet Nam | NA1 | 11 |
| KJ939968 | VN-833-9/10  | 2010 | Viet Nam | NA1 | 11 |
| KJ939969 | VN-834-9/10  | 2010 | Viet Nam | NA1 | 11 |

---

**Supplementary Table S1** (continued). Strains used in this study.

| GenBank accession No. | Strain                              | Collection year | Country     | Genotype | References or authorship |
|-----------------------|-------------------------------------|-----------------|-------------|----------|--------------------------|
| KJ939970              | VN-844-11/10                        | 2010            | Viet Nam    | NA1      | 11                       |
| KJ939971              | VN-848-12/10                        | 2010            | Viet Nam    | NA1      | 11                       |
| KM042382              | RSVA/Homo sapiens/USA/LA2_47/2013   | 2013            | USA         | NA1      | Das, S. et al.           |
| KM042384              | RSVA/Homo sapiens/USA/LA2_78/2013   | 2013            | USA         | NA1      | Das, S. et al.           |
| KM042385              | RSVA/Homo sapiens/USA/LA2_39/2013   | 2013            | USA         | NA1      | Das, S. et al.           |
| KM042386              | RSVA/Homo sapiens/USA/LA2_49/2013   | 2013            | USA         | NA1      | Das, S. et al.           |
| KM042388              | RSVA/Homo sapiens/USA/LA2_98/2013   | 2013            | USA         | NA1      | Das, S. et al.           |
| KM042389              | RSVA/Homo sapiens/USA/LA2_10/2012   | 2012            | USA         | NA1      | Das, S. et al.           |
| KM042390              | RSVA/Homo sapiens/USA/LA2_94/2013   | 2013            | USA         | NA1      | Das, S. et al.           |
| KM042391              | RSVA/Homo sapiens/USA/LA2_83/2013   | 2013            | USA         | NA1      | Das, S. et al.           |
| KM042392              | RSVA/Homo sapiens/USA/LA2_56/2013   | 2013            | USA         | NA1      | Das, S. et al.           |
| KM517572              | A/GZ/11-224                         | 2011            | China       | NA1      | Xie, J.H. et al.         |
| KM578843              | A/GZ/12-110                         | 2012            | China       | NA1      | Xie, J.H. et al.         |
| KP119748              | HRSV-A-GZ08-19                      | 2012            | Hong Kong   | NA1      | 8                        |
| KP317920              | Kilifi_11862_28_RSVA_2010           | 2011            | Kenya       | NA1      | 5                        |
| KP317921              | Kilifi_11862_33_RSVA_2010           | 2010            | Kenya       | NA1      | 5                        |
| KP317926              | Kilifi_10891_60_RSVA_2007           | 2007            | Kenya       | NA1      | 5                        |
| KP317935              | Kilifi_10899_41_RSVA_2010           | 2010            | Kenya       | NA1      | 5                        |
| KP317951              | Kilifi_11864_53_RSVA_2011           | 2011            | Kenya       | NA1      | 5                        |
| KP317953              | Kilifi_11862_29_RSVA_2011           | 2012            | Kenya       | NA1      | 5                        |
| KP317955              | Kilifi_10028_12_RSVA_2003           | 2003            | Kenya       | NA1      | 5                        |
| KP663728              | HRSV-A/IC688/12                     | 2012            | South Korea | NA1      | 18                       |
| KT285064              | B614122905                          | 2014            | China       | NA1      | 19                       |
| KU839630              | RSVA/Homo sapiens/USA/TH-28/2014    | 2014            | USA         | NA1      | Das, S.R. et al.         |
| KU839637              | RSVA/Homo sapiens/USA/TH-24/2014    | 2014            | USA         | NA1      | Das, S.R. et al.         |
| KU950460              | RSVA/Homo sapiens/USA/TH_10473/2013 | 2013            | USA         | NA1      | Das, S.R. et al.         |
| KU950464              | RSVA/Homo sapiens/USA/TH_10654/2014 | 2014            | USA         | NA1      | Das, S.R. et al.         |
| KU950480              | RSVA/Homo sapiens/USA/TH_10272/2012 | 2012            | USA         | NA1      | Das, S.R. et al.         |
| KU950483              | RSVA/Homo sapiens/USA/TH_10534/2013 | 2013            | USA         | NA1      | Das, S.R. et al.         |
| KU950485              | RSVA/Homo sapiens/USA/TH_10210/2012 | 2012            | USA         | NA1      | Das, S.R. et al.         |
| KU950486              | RSVA/Homo sapiens/USA/TH_10280/2012 | 2012            | USA         | NA1      | Das, S.R. et al.         |
| KU950491              | RSVA/Homo sapiens/USA/TH_10518/2013 | 2013            | USA         | NA1      | Das, S.R. et al.         |
| KU950492              | RSVA/Homo sapiens/USA/TH_10166/2012 | 2012            | USA         | NA1      | Das, S.R. et al.         |
| KU950505              | RSVA/Homo sapiens/USA/TH_10651/2013 | 2013            | USA         | NA1      | Das, S.R. et al.         |
| KU950511              | RSVA/Homo sapiens/USA/TH_10218/2012 | 2012            | USA         | NA1      | Das, S.R. et al.         |
| KU950513              | RSVA/Homo sapiens/USA/TH_10173/2012 | 2012            | USA         | NA1      | Das, S.R. et al.         |
| KU950519              | RSVA/Homo sapiens/USA/TH_10629/2013 | 2013            | USA         | NA1      | Das, S.R. et al.         |
| KU950521              | RSVA/Homo sapiens/USA/TH_10149/2012 | 2012            | USA         | NA1      | Das, S.R. et al.         |
| KU950523              | RSVA/Homo sapiens/USA/TH_10656/2014 | 2014            | USA         | NA1      | Das, S.R. et al.         |
| KU950524              | RSVA/Homo sapiens/USA/TH_10094/2012 | 2012            | USA         | NA1      | Das, S.R. et al.         |
| KU950529              | RSVA/Homo sapiens/USA/TH_10116/2012 | 2012            | USA         | NA1      | Das, S.R. et al.         |
| KU950531              | RSVA/Homo sapiens/USA/TH_10523/2013 | 2013            | USA         | NA1      | Das, S.R. et al.         |
| KU950541              | RSVA/Homo sapiens/USA/TH_10318/2013 | 2013            | USA         | NA1      | Das, S.R. et al.         |
| KU950549              | RSVA/Homo sapiens/USA/TH_10630/2013 | 2013            | USA         | NA1      | Das, S.R. et al.         |
| KU950550              | RSVA/Homo sapiens/USA/TH_10287/2012 | 2012            | USA         | NA1      | Das, S.R. et al.         |
| KU950556              | RSVA/Homo sapiens/USA/TH_10305/2012 | 2012            | USA         | NA1      | Das, S.R. et al.         |
| KU950567              | RSVA/Homo sapiens/USA/TH_10324/2012 | 2012            | USA         | NA1      | Das, S.R. et al.         |
| KU950581              | RSVA/Homo sapiens/USA/TH_10159/2012 | 2012            | USA         | NA1      | Das, S.R. et al.         |
| KU950585              | RSVB/Homo sapiens/USA/TH_10613/2013 | 2013            | USA         | NA1      | Das, S.R. et al.         |

---

|          |                                     |      |     |     |                  |
|----------|-------------------------------------|------|-----|-----|------------------|
| KU950590 | RSVA/Homo sapiens/USA/TH_10387/2013 | 2013 | USA | NA1 | Das, S.R. et al. |
| KU950594 | RSVA/Homo sapiens/USA/TH_10538/2013 | 2013 | USA | NA1 | Das, S.R. et al. |
| KU950598 | RSVA/Homo sapiens/USA/TH_10618/2013 | 2013 | USA | NA1 | Das, S.R. et al. |
| KU950608 | RSVA/Homo sapiens/USA/TH_10508/2013 | 2013 | USA | NA1 | Das, S.R. et al. |
| KU950610 | RSVA/Homo sapiens/USA/TH_10260/2013 | 2013 | USA | NA1 | Das, S.R. et al. |
| KU950612 | RSVA/Homo sapiens/USA/TH_10281/2012 | 2012 | USA | NA1 | Das, S.R. et al. |
| KU950617 | RSVA/Homo sapiens/USA/TH_10229/2012 | 2012 | USA | NA1 | Das, S.R. et al. |
| KU950623 | RSVA/Homo sapiens/USA/TH_10606/2013 | 2013 | USA | NA1 | Das, S.R. et al. |
| KU950624 | RSVA/Homo sapiens/USA/TH_10337/2013 | 2013 | USA | NA1 | Das, S.R. et al. |
| KU950626 | RSVA/Homo sapiens/USA/TH_10207/2013 | 2013 | USA | NA1 | Das, S.R. et al. |

---

**Supplementary Table S1** (continued). Strains used in this study.

| GenBank accession No. | Strain                              | Collection year | Country | Genotype | References or authorship |
|-----------------------|-------------------------------------|-----------------|---------|----------|--------------------------|
| KU950627              | RSVA/Homo sapiens/USA/TH_10569/2013 | 2013            | USA     | NA1      | Das, S.R. et al.         |
| KU950628              | RSVA/Homo sapiens/USA/TH_10364/2013 | 2013            | USA     | NA1      | Das, S.R. et al.         |
| KU950629              | RSVA/Homo sapiens/USA/TH_10500/2013 | 2013            | USA     | NA1      | Das, S.R. et al.         |
| KU950631              | RSVA/Homo sapiens/USA/TH_10093/2012 | 2012            | USA     | NA1      | Das, S.R. et al.         |
| KU950638              | RSVA/Homo sapiens/USA/TH_10552/2013 | 2013            | USA     | NA1      | Das, S.R. et al.         |
| KU950642              | RSVA/Homo sapiens/USA/TH_10128/2012 | 2012            | USA     | NA1      | Das, S.R. et al.         |
| KU950643              | RSVA/Homo sapiens/USA/TH_10268/2012 | 2012            | USA     | NA1      | Das, S.R. et al.         |
| KU950649              | RSVA/Homo sapiens/USA/TH_11186/2012 | 2012            | USA     | NA1      | Das, S.R. et al.         |
| KU950652              | RSVA/Homo sapiens/USA/TH_10144/2012 | 2012            | USA     | NA1      | Das, S.R. et al.         |
| KU950655              | RSVA/Homo sapiens/USA/TH_10293/2012 | 2012            | USA     | NA1      | Das, S.R. et al.         |
| KU950661              | RSVA/Homo sapiens/USA/TH_10183/2012 | 2012            | USA     | NA1      | Das, S.R. et al.         |
| KU950666              | RSVA/Homo sapiens/USA/TH_10657/2013 | 2013            | USA     | NA1      | Das, S.R. et al.         |
| KU950667              | RSVA/Homo sapiens/USA/TH_10104/2012 | 2012            | USA     | NA1      | Das, S.R. et al.         |
| KU950670              | RSVA/Homo sapiens/USA/TH_10220/2012 | 2012            | USA     | NA1      | Das, S.R. et al.         |
| KU950673              | RSVA/Homo sapiens/USA/TH_10236/2012 | 2012            | USA     | NA1      | Das, S.R. et al.         |
| KU950677              | RSVA/Homo sapiens/USA/TH_10148/2012 | 2012            | USA     | NA1      | Das, S.R. et al.         |
| KU950685              | RSVA/Homo sapiens/USA/TH_10509/2013 | 2013            | USA     | NA1      | Das, S.R. et al.         |
| KU950686              | RSVA/Homo sapiens/USA/TH_10506/2014 | 2014            | USA     | NA1      | Das, S.R. et al.         |
| KU950694              | RSVA/Homo sapiens/USA/TH_10233/2012 | 2012            | USA     | NA1      | Das, S.R. et al.         |
| KU950696              | RSVA/Homo sapiens/USA/TH_10283/2012 | 2012            | USA     | NA1      | Das, S.R. et al.         |
| KX510137              | Kilifi_10590_33_RSVA_2010           | 2010            | Kenya   | NA1      | Agoti, C.N. et al.       |
| KX510141              | Kilifi_10028_7_RSVA_2010            | 2010            | Kenya   | NA1      | Agoti, C.N. et al.       |
| KX510142              | Kilifi_10010_53_RSVA_2010           | 2010            | Kenya   | NA1      | Agoti, C.N. et al.       |
| KX510157              | Kilifi_10028_6_RSVA_2010            | 2010            | Kenya   | NA1      | Agoti, C.N. et al.       |
| KX510159              | Kilifi_10025_30_RSVA_2010           | 2010            | Kenya   | NA1      | Agoti, C.N. et al.       |
| KX510189              | Kilifi_9466_21_RSVA_2010            | 2010            | Kenya   | NA1      | Agoti, C.N. et al.       |
| KX510223              | Kilifi_10028_15_RSVA_2010           | 2010            | Kenya   | NA1      | Agoti, C.N. et al.       |
| KX510229              | Kilifi_10025_25_RSVA_2010           | 2010            | Kenya   | NA1      | Agoti, C.N. et al.       |
| KX510237              | Kilifi_9696_36_RSVA_2010            | 2010            | Kenya   | NA1      | Agoti, C.N. et al.       |
| KX510243              | Kilifi_11862_27_RSVA_2010           | 2010            | Kenya   | NA1      | Agoti, C.N. et al.       |
| KX510247              | Kilifi_10028_8_RSVA_2010            | 2010            | Kenya   | NA1      | Agoti, C.N. et al.       |
| KX510253              | Kilifi_10014_42_RSVA_2010           | 2010            | Kenya   | NA1      | Agoti, C.N. et al.       |
| KX510261              | Kilifi_10014_40_RSVA_2010           | 2010            | Kenya   | NA1      | Agoti, C.N. et al.       |
| KX655616              | RSVA/Homo sapiens/JOR/A0444/2012    | 2012            | Jordan  | NA1      | Shabman, R. et al.       |
| KX655623              | RSVA/Homo sapiens/JOR/B1148/2011    | 2011            | Jordan  | NA1      | Shabman, R. et al.       |
| KX655626              | RSVA/Homo sapiens/JOR/D3721/2013    | 2013            | Jordan  | NA1      | Shabman, R. et al.       |
| KX655630              | RSVA/Homo sapiens/JOR/B1429/2012    | 2012            | Jordan  | NA1      | Shabman, R. et al.       |
| KX655631              | RSVA/Homo sapiens/JOR/C2186/2011    | 2011            | Jordan  | NA1      | Shabman, R. et al.       |
| KX655632              | RSVA/Homo sapiens/JOR/B1543/2012    | 2012            | Jordan  | NA1      | Shabman, R. et al.       |
| KX655636              | RSVA/Homo sapiens/JOR/B1191/2011    | 2011            | Jordan  | NA1      | Shabman, R. et al.       |
| KX655637              | RSVA/Homo sapiens/JOR/C2109/2011    | 2011            | Jordan  | NA1      | Shabman, R. et al.       |
| KX655638              | RSVA/Homo sapiens/JOR/A0398/2012    | 2012            | Jordan  | NA1      | Shabman, R. et al.       |
| KX655639              | RSVA/Homo sapiens/JOR/A0125/2011    | 2011            | Jordan  | NA1      | Shabman, R. et al.       |
| KX655640              | RSVA/Homo sapiens/JOR/D3681/2013    | 2013            | Jordan  | NA1      | Shabman, R. et al.       |
| KX655643              | RSVA/Homo sapiens/JOR/D3156/2011    | 2011            | Jordan  | NA1      | Shabman, R. et al.       |
| KX655644              | RSVA/Homo sapiens/JOR/A0614/2012    | 2012            | Jordan  | NA1      | Shabman, R. et al.       |
| KX655647              | RSVA/Homo sapiens/JOR/A0400/2012    | 2012            | Jordan  | NA1      | Shabman, R. et al.       |
| KX655650              | RSVA/Homo sapiens/JOR/C2147/2011    | 2011            | Jordan  | NA1      | Shabman, R. et al.       |
| KX655656              | RSVA/Homo sapiens/JOR/D3007/2010    | 2010            | Jordan  | NA1      | Shabman, R. et al.       |

---

|          |                                  |      |        |     |                    |
|----------|----------------------------------|------|--------|-----|--------------------|
| KX655657 | RSVA/Homo sapiens/JOR/D3040/2010 | 2010 | Jordan | NA1 | Shabman, R. et al. |
| KX655658 | RSVA/Homo sapiens/JOR/C2659/2012 | 2012 | Jordan | NA1 | Shabman, R. et al. |
| KX655662 | RSVA/Homo sapiens/JOR/D3317/2011 | 2011 | Jordan | NA1 | Shabman, R. et al. |
| KX655663 | RSVA/Homo sapiens/JOR/D3416/2012 | 2012 | Jordan | NA1 | Shabman, R. et al. |
| KX655665 | RSVA/Homo sapiens/JOR/C2769/2013 | 2013 | Jordan | NA1 | Shabman, R. et al. |
| KX655666 | RSVA/Homo sapiens/JOR/D3141/2011 | 2011 | Jordan | NA1 | Shabman, R. et al. |
| KX655670 | RSVA/Homo sapiens/JOR/B1464/2012 | 2012 | Jordan | NA1 | Shabman, R. et al. |
| KX655672 | RSVA/Homo sapiens/JOR/C2356/2012 | 2012 | Jordan | NA1 | Shabman, R. et al. |
| KX655675 | RSVA/Homo sapiens/JOR/D3431/2012 | 2012 | Jordan | NA1 | Shabman, R. et al. |
| KX655676 | RSVA/Homo sapiens/JOR/B1432/2012 | 2012 | Jordan | NA1 | Shabman, R. et al. |

---



**Supplementary Table S1** (continued). Strains used in this study.

| GenBank accession No. | Strain                               | Collection year | Country     | Genotype | References or authorship |
|-----------------------|--------------------------------------|-----------------|-------------|----------|--------------------------|
| KX655677              | RSVA/Homo sapiens/JOR/B1391/2012     | 2012            | Jordan      | NA1      | Shabman, R. et al.       |
| KX655678              | RSVA/Homo sapiens/JOR/A0108/2011     | 2011            | Jordan      | NA1      | Shabman, R. et al.       |
| KX655679              | RSVA/Homo sapiens/JOR/B1035/2010     | 2010            | Jordan      | NA1      | Shabman, R. et al.       |
| KX655682              | RSVA/Homo sapiens/JOR/B1515/2012     | 2012            | Jordan      | NA1      | Shabman, R. et al.       |
| KX655689              | RSVA/Homo sapiens/JOR/B1454/2012     | 2012            | Jordan      | NA1      | Shabman, R. et al.       |
| KX655691              | RSVA/Homo sapiens/JOR/D3371/2012     | 2012            | Jordan      | NA1      | Shabman, R. et al.       |
| KX655692              | RSVA/Homo sapiens/JOR/C2196/2011     | 2011            | Jordan      | NA1      | Shabman, R. et al.       |
| KX655694              | RSVA/Homo sapiens/JOR/A0215/2011     | 2011            | Jordan      | NA1      | Shabman, R. et al.       |
| KX655696              | RSVA/Homo sapiens/JOR/C2121/2011     | 2011            | Jordan      | NA1      | Shabman, R. et al.       |
| KX655697              | RSVA/Homo sapiens/JOR/A0417/2012     | 2012            | Jordan      | NA1      | Shabman, R. et al.       |
| KX655699              | RSVA/Homo sapiens/JOR/D3332/2012     | 2012            | Jordan      | NA1      | Shabman, R. et al.       |
| KX765894              | RSVA/Homo sapiens/NZL/LJRSV84/2011   | 2011            | New Zealand | NA1      | Shabman, R. et al.       |
| KX765896              | RSVA/Homo sapiens/NZL/LJRSV81/2011   | 2011            | New Zealand | NA1      | Shabman, R. et al.       |
| KX765898              | RSVA/Homo sapiens/NZL/LJRSV12/2015   | 2015            | New Zealand | NA1      | Shabman, R. et al.       |
| KX765902              | RSVA/Homo sapiens/NZL/LJRSV33/2014   | 2014            | New Zealand | NA1      | Shabman, R. et al.       |
| KX765910              | RSVA/Homo sapiens/NZL/LJRSV69/2011   | 2011            | New Zealand | NA1      | Shabman, R. et al.       |
| KX765911              | RSVA/Homo sapiens/NZL/LJRSV75/2011   | 2011            | New Zealand | NA1      | Shabman, R. et al.       |
| KX765916              | RSVA/Homo sapiens/NZL/LJRSV02/2015   | 2015            | New Zealand | NA1      | Shabman, R. et al.       |
| KX765917              | RSVA/Homo sapiens/NZL/LJRSV28/2014   | 2014            | New Zealand | NA1      | Shabman, R. et al.       |
| KX765918              | RSVA/Homo sapiens/NZL/LJRSV77/2011   | 2011            | New Zealand | NA1      | Shabman, R. et al.       |
| KX765919              | RSVA/Homo sapiens/NZL/LJRSV37/2013   | 2013            | New Zealand | NA1      | Shabman, R. et al.       |
| KX765924              | RSVA/Homo sapiens/NZL/LJRSV99/2010   | 2010            | New Zealand | NA1      | Shabman, R. et al.       |
| KX765925              | RSVA/Homo sapiens/NZL/LJRSV13/2015   | 2015            | New Zealand | NA1      | Shabman, R. et al.       |
| KX765926              | RSVA/Homo sapiens/NZL/LJRSV59/2012   | 2012            | New Zealand | NA1      | Shabman, R. et al.       |
| KX765928              | RSVA/Homo sapiens/NZL/LJRSV83/2011   | 2011            | New Zealand | NA1      | Shabman, R. et al.       |
| KX765931              | RSVA/Homo sapiens/NZL/LJRSV70/2011   | 2011            | New Zealand | NA1      | Shabman, R. et al.       |
| KX765932              | RSVA/Homo sapiens/NZL/LJRSV06/2015   | 2015            | New Zealand | NA1      | Shabman, R. et al.       |
| KX765934              | RSVA/Homo sapiens/NZL/LJRSV65/2012   | 2012            | New Zealand | NA1      | Shabman, R. et al.       |
| KX765938              | RSVA/Homo sapiens/NZL/LJRSV74/2011   | 2011            | New Zealand | NA1      | Shabman, R. et al.       |
| KX765941              | RSVA/Homo sapiens/NZL/LJRSV04/2015   | 2015            | New Zealand | NA1      | Shabman, R. et al.       |
| KX765942              | RSVA/Homo sapiens/NZL/LJRSV80/2011   | 2011            | New Zealand | NA1      | Shabman, R. et al.       |
| KX765944              | RSVA/Homo sapiens/NZL/LJRSV08/2015   | 2015            | New Zealand | NA1      | Shabman, R. et al.       |
| KX765946              | RSVA/Homo sapiens/NZL/LJRSV57/2012   | 2012            | New Zealand | NA1      | Shabman, R. et al.       |
| KX765955              | RSVA/Homo sapiens/NZL/LJRSV09/2015   | 2015            | New Zealand | NA1      | Shabman, R. et al.       |
| KX765956              | RSVA/Homo sapiens/NZL/LJRSV14/2015   | 2015            | New Zealand | NA1      | Shabman, R. et al.       |
| KX765958              | RSVA/Homo sapiens/NZL/LJRSV68/2012   | 2012            | New Zealand | NA1      | Shabman, R. et al.       |
| KX765960              | RSVA/Homo sapiens/NZL/LJRSV76/2011   | 2011            | New Zealand | NA1      | Shabman, R. et al.       |
| KX765967              | RSVA/Homo sapiens/NZL/LJRSV64/2012   | 2012            | New Zealand | NA1      | Shabman, R. et al.       |
| KX765969              | RSVA/Homo sapiens/NZL/LJRSV61/2012   | 2012            | New Zealand | NA1      | Shabman, R. et al.       |
| KX765970              | RSVA/Homo sapiens/NZL/LJRSV31/2014   | 2014            | New Zealand | NA1      | Shabman, R. et al.       |
| KX765977              | RSVA/Homo sapiens/NZL/LJRSV18/2014   | 2014            | New Zealand | NA1      | Shabman, R. et al.       |
| KX858757              | 13-005275                            | 2013            | Netherlands | NA1      | Coenjaerts, F.E.J.       |
| KX894805              | RSVA/Homo sapiens/USA/TH_10293P/2013 | 2013            | USA         | NA1      | Shabman, R. et al.       |
| KX894807              | RSVA/Homo sapiens/USA/TH_10280P/2013 | 2013            | USA         | NA1      | Shabman, R. et al.       |
| KY296707              | CC12-10                              | 2012            | China       | NA1      | 9                        |
| KY296714              | BJ_08-14                             | 2005            | China       | NA1      | 9                        |
| KY296717              | BJ_09-58                             | 2005            | China       | NA1      | 9                        |
| KY296719              | BJ_10-28                             | 2005            | China       | NA1      | 9                        |
| KY296720              | BJ_11-01                             | 2011            | China       | NA1      | 9                        |

---

|          |         |      |       |     |   |
|----------|---------|------|-------|-----|---|
| KY296721 | CC09-01 | 2009 | China | NA1 | 9 |
| KY296722 | CC12-09 | 2012 | China | NA1 | 9 |
| KY296723 | CC12-11 | 2012 | China | NA1 | 9 |
| KY296724 | CC12-14 | 2012 | China | NA1 | 9 |
| KY296725 | CC12-16 | 2012 | China | NA1 | 9 |
| KY296726 | CC13-01 | 2013 | China | NA1 | 9 |
| KY296727 | CC13-12 | 2013 | China | NA1 | 9 |
| KY296729 | CC13-21 | 2013 | China | NA1 | 9 |
| KY296730 | CC14-10 | 2014 | China | NA1 | 9 |
| KY296732 | CC14-52 | 2014 | China | NA1 | 9 |

---

**Supplementary Table S1** (continued). Strains used in this study.

| GenBank accession No. | Strain   | Collection year | Country | Genotype | References or authorship |
|-----------------------|----------|-----------------|---------|----------|--------------------------|
| KY296733              | CC14-76  | 2014            | China   | NA1      | 9                        |
| KY296734              | GZ10-01  | 2005            | China   | NA1      | 9                        |
| KY296735              | GZ10-06  | 2005            | China   | NA1      | 9                        |
| KY296736              | GZ11-01  | 2011            | China   | NA1      | 9                        |
| KY296737              | GZ11-04  | 2011            | China   | NA1      | 9                        |
| KY296740              | GZ11-11  | 2005            | China   | NA1      | 9                        |
| KY296741              | GZ11-12  | 2005            | China   | NA1      | 9                        |
| KY296742              | GZ11-13  | 2005            | China   | NA1      | 9                        |
| KY296743              | GZ11-14  | 2005            | China   | NA1      | 9                        |
| KY296744              | GZ11-15  | 2005            | China   | NA1      | 9                        |
| KY296745              | GZ11-16  | 2005            | China   | NA1      | 9                        |
| KY296746              | GZ11-17  | 2005            | China   | NA1      | 9                        |
| KY296749              | GZ11-02  | 2011            | China   | NA1      | 9                        |
| KY296750              | GZ11-20  | 2005            | China   | NA1      | 9                        |
| KY296752              | GZ11-22  | 2005            | China   | NA1      | 9                        |
| KY296753              | GZ11-24  | 2005            | China   | NA1      | 9                        |
| KY296754              | GZ11-25  | 2005            | China   | NA1      | 9                        |
| KY296755              | GZ11-26  | 2005            | China   | NA1      | 9                        |
| KY296756              | GZ11-27  | 2005            | China   | NA1      | 9                        |
| KY296758              | GZ11-05  | 2011            | China   | NA1      | 9                        |
| KY296759              | GZ11-06  | 2011            | China   | NA1      | 9                        |
| KY296760              | GZ11-07  | 2011            | China   | NA1      | 9                        |
| KY296761              | GZ11-08  | 2011            | China   | NA1      | 9                        |
| KY296762              | GZ12-01  | 2012            | China   | NA1      | 9                        |
| KY296763              | HeB13-02 | 2013            | China   | NA1      | 9                        |
| KY296764              | HeB14-01 | 2014            | China   | NA1      | 9                        |
| KY296765              | HuN12-04 | 2012            | China   | NA1      | 9                        |
| KY296766              | HuN12-20 | 2012            | China   | NA1      | 9                        |
| KY296768              | HuN14-02 | 2005            | China   | NA1      | 9                        |
| KY296770              | HuN14-04 | 2005            | China   | NA1      | 9                        |
| KY296771              | SaX10-45 | 2010            | China   | NA1      | 9                        |
| KY296772              | SaX10-46 | 2010            | China   | NA1      | 9                        |
| KY296774              | SaX10-64 | 2010            | China   | NA1      | 9                        |
| KY296775              | SaX10-68 | 2010            | China   | NA1      | 9                        |
| KY296776              | SaX11-01 | 2011            | China   | NA1      | 9                        |
| KY296777              | SaX11-15 | 2011            | China   | NA1      | 9                        |
| KY296778              | SaX11-16 | 2011            | China   | NA1      | 9                        |
| KY296779              | SaX13-43 | 2013            | China   | NA1      | 9                        |
| KY296781              | GS10-03  | 2010            | China   | NA1      | 9                        |
| KY296782              | GS10-04  | 2010            | China   | NA1      | 9                        |
| KY296786              | GS11-08  | 2011            | China   | NA1      | 9                        |
| KY296787              | GS11-11  | 2011            | China   | NA1      | 9                        |
| KY296788              | GS11-13  | 2011            | China   | NA1      | 9                        |
| KY296790              | GS11-20  | 2011            | China   | NA1      | 9                        |
| KY296793              | HuN11-01 | 2014            | China   | NA1      | 9                        |
| KY296794              | SH10-10  | 2010            | China   | NA1      | 9                        |
| KY296795              | SH10-15  | 2010            | China   | NA1      | 9                        |
| KY296796              | SH10-16  | 2010            | China   | NA1      | 9                        |
| KY296797              | SH10-17  | 2010            | China   | NA1      | 9                        |

---

|          |               |      |             |     |                |
|----------|---------------|------|-------------|-----|----------------|
| KY460517 | TW-00026-2010 | 2010 | Taiwan      | NA1 | 20             |
| KY654506 | TTa-12-054    | 2012 | Philippines | NA1 | 21             |
| KY654508 | TEv-12-111    | 2012 | Philippines | NA1 | 21             |
| KY654509 | TEv-12-137    | 2012 | Philippines | NA1 | 21             |
| KY654510 | TOp-12-061    | 2012 | Philippines | NA1 | 21             |
| KY654511 | TBp-13-167    | 2013 | Philippines | NA1 | 21             |
| KY654514 | TEv-13-132    | 2013 | Philippines | NA1 | 21             |
| KY654516 | TOp-13-186    | 2013 | Philippines | NA1 | 21             |
| KY654517 | TOp-13-203    | 2013 | Philippines | NA1 | 21             |
| KY782635 | LZ01/09       | 2009 | China       | NA1 | Zhu, C. et al. |

---

**Supplementary Table S1** (continued). Strains used in this study.

| GenBank accession No. | Strain                            | Collection year | Country   | Genotype | References or authorship |
|-----------------------|-----------------------------------|-----------------|-----------|----------|--------------------------|
| KY883566              | HRSV/A/BuenosAires/ARG/001/2015   | 2015            | Argentina | NA1      | Goya, S. et al.          |
| KY883572              | HRSV/A/BuenosAires/ARG/003/2015   | 2015            | Argentina | NA1      | Goya, S. et al.          |
| KY967362              | SC2892                            | 2015            | USA       | NA1      | Greninger, A.L. et al.   |
| KY967363              | SC2745                            | 2015            | USA       | NA1      | Greninger, A.L. et al.   |
| KY982517              | RSVA/Homo sapiens/USA/LA2_03/2013 | 2013            | USA       | NA1      | Shrivastava, S. et al.   |
| LC337896              | HRSV/Yokohama.JPN/P2733/2004      | 2004            | Japan     | NA1      | Saikusa, M. et al.       |
| LC337898              | HRSV/Yokohama.JPN/P2747/2004      | 2004            | Japan     | NA1      | Saikusa, M. et al.       |
| LC337908              | HRSV/Yokohama.JPN/P2820/2005      | 2005            | Japan     | NA1      | Saikusa, M. et al.       |
| LC337910              | HRSV/Yokohama.JPN/P3180/2005      | 2005            | Japan     | NA1      | Saikusa, M. et al.       |
| LC337911              | HRSV/Yokohama.JPN/P3189/2005      | 2005            | Japan     | NA1      | Saikusa, M. et al.       |
| LC337912              | HRSV/Yokohama.JPN/P3194/2005      | 2005            | Japan     | NA1      | Saikusa, M. et al.       |
| LC337913              | HRSV/Yokohama.JPN/P3196/2005      | 2005            | Japan     | NA1      | Saikusa, M. et al.       |
| LC337915              | HRSV/Yokohama.JPN/P3227/2005      | 2005            | Japan     | NA1      | Saikusa, M. et al.       |
| LC365793              | HRSV/Yokohama.JPN/P4258/2008      | 2008            | Japan     | NA1      | Saikusa, M. et al.       |
| LC365794              | HRSV/Yokohama.JPN/P4352/2008      | 2008            | Japan     | NA1      | Saikusa, M. et al.       |
| LC365796              | HRSV/Yokohama.JPN/P4396/2008      | 2008            | Japan     | NA1      | Saikusa, M. et al.       |
| LC365800              | HRSV/Yokohama.JPN/P4425/2008      | 2008            | Japan     | NA1      | Saikusa, M. et al.       |
| LC365802              | HRSV/Yokohama.JPN/P4431/2008      | 2008            | Japan     | NA1      | Saikusa, M. et al.       |
| LC365804              | HRSV/Yokohama.JPN/P4434/2008      | 2008            | Japan     | NA1      | Saikusa, M. et al.       |
| LC365806              | HRSV/Yokohama.JPN/P4438/2008      | 2008            | Japan     | NA1      | Saikusa, M. et al.       |
| LC365807              | HRSV/Yokohama.JPN/P4440/2008      | 2008            | Japan     | NA1      | Saikusa, M. et al.       |
| LC365808              | HRSV/Yokohama.JPN/P4443/2008      | 2008            | Japan     | NA1      | Saikusa, M. et al.       |
| LC365809              | HRSV/Yokohama.JPN/P4449/2008      | 2008            | Japan     | NA1      | Saikusa, M. et al.       |
| LC365810              | HRSV/Yokohama.JPN/P4450/2008      | 2008            | Japan     | NA1      | Saikusa, M. et al.       |
| LC365811              | HRSV/Yokohama.JPN/P4456/2008      | 2008            | Japan     | NA1      | Saikusa, M. et al.       |
| LC365812              | HRSV/Yokohama.JPN/P4459/2008      | 2008            | Japan     | NA1      | Saikusa, M. et al.       |
| LC365813              | HRSV/Yokohama.JPN/P4470/2008      | 2008            | Japan     | NA1      | Saikusa, M. et al.       |
| LC365814              | HRSV/Yokohama.JPN/P4486/2008      | 2008            | Japan     | NA1      | Saikusa, M. et al.       |
| LC365817              | HRSV/Yokohama.JPN/P4497/2008      | 2008            | Japan     | NA1      | Saikusa, M. et al.       |
| LC365818              | HRSV/Yokohama.JPN/P4499/2008      | 2008            | Japan     | NA1      | Saikusa, M. et al.       |
| LC365819              | HRSV/Yokohama.JPN/P5050/2009      | 2009            | Japan     | NA1      | Saikusa, M. et al.       |
| LC365821              | HRSV/Yokohama.JPN/P5077/2010      | 2010            | Japan     | NA1      | Saikusa, M. et al.       |
| LC365822              | HRSV/Yokohama.JPN/P5082/2010      | 2010            | Japan     | NA1      | Saikusa, M. et al.       |
| LC365823              | HRSV/Yokohama.JPN/P5114/2010      | 2010            | Japan     | NA1      | Saikusa, M. et al.       |
| LC365824              | HRSV/Yokohama.JPN/P5123/2010      | 2010            | Japan     | NA1      | Saikusa, M. et al.       |
| LC365825              | HRSV/Yokohama.JPN/P5127/2010      | 2010            | Japan     | NA1      | Saikusa, M. et al.       |
| LC365828              | HRSV/Yokohama.JPN/P5142/2010      | 2010            | Japan     | NA1      | Saikusa, M. et al.       |
| LC365830              | HRSV/Yokohama.JPN/P5166/2010      | 2010            | Japan     | NA1      | Saikusa, M. et al.       |
| LC365831              | HRSV/Yokohama.JPN/P5167/2010      | 2010            | Japan     | NA1      | Saikusa, M. et al.       |
| LC365832              | HRSV/Yokohama.JPN/P5172/2010      | 2010            | Japan     | NA1      | Saikusa, M. et al.       |
| LC365833              | HRSV/Yokohama.JPN/P5173/2010      | 2010            | Japan     | NA1      | Saikusa, M. et al.       |
| LC365834              | HRSV/Yokohama.JPN/P5184/2010      | 2010            | Japan     | NA1      | Saikusa, M. et al.       |
| LC365835              | HRSV/Yokohama.JPN/P5187/2010      | 2010            | Japan     | NA1      | Saikusa, M. et al.       |
| LC365836              | HRSV/Yokohama.JPN/P5188/2010      | 2010            | Japan     | NA1      | Saikusa, M. et al.       |
| LC365837              | HRSV/Yokohama.JPN/P5193/2010      | 2010            | Japan     | NA1      | Saikusa, M. et al.       |
| LC365838              | HRSV/Yokohama.JPN/P5201/2010      | 2010            | Japan     | NA1      | Saikusa, M. et al.       |
| LC365839              | HRSV/Yokohama.JPN/P5202/2010      | 2010            | Japan     | NA1      | Saikusa, M. et al.       |
| LC365840              | HRSV/Yokohama.JPN/P5403/2010      | 2010            | Japan     | NA1      | Saikusa, M. et al.       |
| LC365842              | HRSV/Yokohama.JPN/P5484/2010      | 2010            | Japan     | NA1      | Saikusa, M. et al.       |

---

|          |                              |      |       |     |                    |
|----------|------------------------------|------|-------|-----|--------------------|
| LC365843 | HRSV/Yokohama.JPN/P5485/2010 | 2010 | Japan | NA1 | Saikusa, M. et al. |
| LC365844 | HRSV/Yokohama.JPN/P5486/2010 | 2010 | Japan | NA1 | Saikusa, M. et al. |
| LC365848 | HRSV/Yokohama.JPN/P5513/2010 | 2010 | Japan | NA1 | Saikusa, M. et al. |
| LC365849 | HRSV/Yokohama.JPN/P5517/2010 | 2010 | Japan | NA1 | Saikusa, M. et al. |
| LC365850 | HRSV/Yokohama.JPN/P5531/2010 | 2010 | Japan | NA1 | Saikusa, M. et al. |
| LC365851 | HRSV/Yokohama.JPN/P5567/2010 | 2010 | Japan | NA1 | Saikusa, M. et al. |
| LC365852 | HRSV/Yokohama.JPN/P5583/2010 | 2010 | Japan | NA1 | Saikusa, M. et al. |
| LC365853 | HRSV/Yokohama.JPN/P5587/2010 | 2010 | Japan | NA1 | Saikusa, M. et al. |
| LC365854 | HRSV/Yokohama.JPN/P5591/2010 | 2010 | Japan | NA1 | Saikusa, M. et al. |
| LC365855 | HRSV/Yokohama.JPN/P5594/2010 | 2010 | Japan | NA1 | Saikusa, M. et al. |

---

**Supplementary Table S1** (continued). Strains used in this study.

| GenBank accession No. | Strain                       | Collection year | Country | Genotype | References or authorship |
|-----------------------|------------------------------|-----------------|---------|----------|--------------------------|
| LC365856              | HRSV/Yokohama.JPN/P5596/2010 | 2010            | Japan   | NA1      | Saikusa, M. et al.       |
| LC365857              | HRSV/Yokohama.JPN/P5623/2011 | 2011            | Japan   | NA1      | Saikusa, M. et al.       |
| LC365858              | HRSV/Yokohama.JPN/P5649/2011 | 2011            | Japan   | NA1      | Saikusa, M. et al.       |
| LC365859              | HRSV/Yokohama.JPN/P5718/2011 | 2011            | Japan   | NA1      | Saikusa, M. et al.       |
| LC365862              | HRSV/Yokohama.JPN/HN170/2011 | 2011            | Japan   | NA1      | Saikusa, M. et al.       |
| LC365863              | HRSV/Yokohama.JPN/P5845/2011 | 2011            | Japan   | NA1      | Saikusa, M. et al.       |
| LC365864              | HRSV/Yokohama.JPN/P5920/2011 | 2011            | Japan   | NA1      | Saikusa, M. et al.       |
| LC365865              | HRSV/Yokohama.JPN/P5947/2011 | 2011            | Japan   | NA1      | Saikusa, M. et al.       |
| LC365866              | HRSV/Yokohama.JPN/P5952/2011 | 2011            | Japan   | NA1      | Saikusa, M. et al.       |
| LC365867              | HRSV/Yokohama.JPN/P5957/2011 | 2011            | Japan   | NA1      | Saikusa, M. et al.       |
| LC365868              | HRSV/Yokohama.JPN/P6097/2011 | 2011            | Japan   | NA1      | Saikusa, M. et al.       |
| LC365869              | HRSV/Yokohama.JPN/P6098/2011 | 2011            | Japan   | NA1      | Saikusa, M. et al.       |
| LC365870              | HRSV/Yokohama.JPN/P6106/2011 | 2011            | Japan   | NA1      | Saikusa, M. et al.       |
| LC365871              | HRSV/Yokohama.JPN/P6247/2012 | 2012            | Japan   | NA1      | Saikusa, M. et al.       |
| LC365874              | HRSV/Yokohama.JPN/P6442/2012 | 2012            | Japan   | NA1      | Saikusa, M. et al.       |
| LC365875              | HRSV/Yokohama.JPN/P6467/2012 | 2012            | Japan   | NA1      | Saikusa, M. et al.       |
| LC365877              | HRSV/Yokohama.JPN/P6510/2012 | 2012            | Japan   | NA1      | Saikusa, M. et al.       |
| LC365878              | HRSV/Yokohama.JPN/P6511/2012 | 2012            | Japan   | NA1      | Saikusa, M. et al.       |
| LC365879              | HRSV/Yokohama.JPN/P6512/2012 | 2012            | Japan   | NA1      | Saikusa, M. et al.       |
| LC365880              | HRSV/Yokohama.JPN/P6515/2012 | 2012            | Japan   | NA1      | Saikusa, M. et al.       |
| LC365881              | HRSV/Yokohama.JPN/P6529/2012 | 2012            | Japan   | NA1      | Saikusa, M. et al.       |
| LC365882              | HRSV/Yokohama.JPN/P6533/2012 | 2012            | Japan   | NA1      | Saikusa, M. et al.       |
| LC365883              | HRSV/Yokohama.JPN/P6535/2012 | 2012            | Japan   | NA1      | Saikusa, M. et al.       |
| LC365884              | HRSV/Yokohama.JPN/P6538/2012 | 2012            | Japan   | NA1      | Saikusa, M. et al.       |
| LC365885              | HRSV/Yokohama.JPN/P6539/2012 | 2012            | Japan   | NA1      | Saikusa, M. et al.       |
| LC365886              | HRSV/Yokohama.JPN/P6540/2012 | 2012            | Japan   | NA1      | Saikusa, M. et al.       |
| LC365888              | HRSV/Yokohama.JPN/P6547/2012 | 2012            | Japan   | NA1      | Saikusa, M. et al.       |
| LC365889              | HRSV/Yokohama.JPN/P6548/2012 | 2012            | Japan   | NA1      | Saikusa, M. et al.       |
| LC365893              | HRSV/Yokohama.JPN/P6577/2012 | 2012            | Japan   | NA1      | Saikusa, M. et al.       |
| LC365894              | HRSV/Yokohama.JPN/P6579/2012 | 2012            | Japan   | NA1      | Saikusa, M. et al.       |
| LC365895              | HRSV/Yokohama.JPN/P6580/2012 | 2012            | Japan   | NA1      | Saikusa, M. et al.       |
| LC365896              | HRSV/Yokohama.JPN/P6581/2012 | 2012            | Japan   | NA1      | Saikusa, M. et al.       |
| LC365897              | HRSV/Yokohama.JPN/P6582/2012 | 2012            | Japan   | NA1      | Saikusa, M. et al.       |
| LC365898              | HRSV/Yokohama.JPN/P6587/2012 | 2012            | Japan   | NA1      | Saikusa, M. et al.       |
| LC365899              | HRSV/Yokohama.JPN/P6605/2012 | 2012            | Japan   | NA1      | Saikusa, M. et al.       |
| LC365900              | HRSV/Yokohama.JPN/P6606/2012 | 2012            | Japan   | NA1      | Saikusa, M. et al.       |
| LC365901              | HRSV/Yokohama.JPN/P6621/2012 | 2012            | Japan   | NA1      | Saikusa, M. et al.       |
| LC365902              | HRSV/Yokohama.JPN/P6631/2012 | 2012            | Japan   | NA1      | Saikusa, M. et al.       |
| LC365903              | HRSV/Yokohama.JPN/P6658/2012 | 2012            | Japan   | NA1      | Saikusa, M. et al.       |
| LC365904              | HRSV/Yokohama.JPN/P6669/2012 | 2012            | Japan   | NA1      | Saikusa, M. et al.       |
| LC365905              | HRSV/Yokohama.JPN/P6680/2012 | 2012            | Japan   | NA1      | Saikusa, M. et al.       |
| LC365906              | HRSV/Yokohama.JPN/P6681/2012 | 2012            | Japan   | NA1      | Saikusa, M. et al.       |
| LC365907              | HRSV/Yokohama.JPN/P6696/2012 | 2012            | Japan   | NA1      | Saikusa, M. et al.       |
| LC365908              | HRSV/Yokohama.JPN/P6694/2013 | 2013            | Japan   | NA1      | Saikusa, M. et al.       |
| LC365909              | HRSV/Yokohama.JPN/P6768/2013 | 2013            | Japan   | NA1      | Saikusa, M. et al.       |
| LC365910              | HRSV/Yokohama.JPN/P6775/2013 | 2013            | Japan   | NA1      | Saikusa, M. et al.       |
| LC365911              | HRSV/Yokohama.JPN/P6798/2013 | 2013            | Japan   | NA1      | Saikusa, M. et al.       |
| LC365912              | HRSV/Yokohama.JPN/P6812/2013 | 2013            | Japan   | NA1      | Saikusa, M. et al.       |
| LC365914              | HRSV/Yokohama.JPN/P6822/2013 | 2013            | Japan   | NA1      | Saikusa, M. et al.       |

---

|          |                              |      |       |     |                    |
|----------|------------------------------|------|-------|-----|--------------------|
| LC365915 | HRSV/Yokohama.JPN/P6892/2013 | 2013 | Japan | NA1 | Saikusa, M. et al. |
| LC365916 | HRSV/Yokohama.JPN/P6949/2013 | 2013 | Japan | NA1 | Saikusa, M. et al. |
| LC367132 | HRSV/Yokohama.JPN/P7052/2013 | 2013 | Japan | NA1 | Saikusa, M. et al. |
| LC367133 | HRSV/Yokohama.JPN/P7087/2013 | 2013 | Japan | NA1 | Saikusa, M. et al. |
| LC367135 | HRSV/Yokohama.JPN/P7111/2013 | 2013 | Japan | NA1 | Saikusa, M. et al. |
| LC367136 | HRSV/Yokohama.JPN/P7112/2013 | 2013 | Japan | NA1 | Saikusa, M. et al. |
| LC367137 | HRSV/Yokohama.JPN/P7134/2013 | 2013 | Japan | NA1 | Saikusa, M. et al. |
| LC367138 | HRSV/Yokohama.JPN/P7136/2013 | 2013 | Japan | NA1 | Saikusa, M. et al. |
| LC367139 | HRSV/Yokohama.JPN/P7137/2013 | 2013 | Japan | NA1 | Saikusa, M. et al. |
| LC367140 | HRSV/Yokohama.JPN/P7142/2013 | 2013 | Japan | NA1 | Saikusa, M. et al. |

---



**Supplementary Table S1** (continued). Strains used in this study.

| GenBank accession No. | Strain                       | Collection year | Country | Genotype | References or authorship |
|-----------------------|------------------------------|-----------------|---------|----------|--------------------------|
| LC367141              | HRSV/Yokohama.JPN/P7154/2013 | 2013            | Japan   | NA1      | Saikusa, M. et al.       |
| LC367142              | HRSV/Yokohama.JPN/P7158/2013 | 2013            | Japan   | NA1      | Saikusa, M. et al.       |
| LC367144              | HRSV/Yokohama.JPN/P7190/2013 | 2013            | Japan   | NA1      | Saikusa, M. et al.       |
| LC367145              | HRSV/Yokohama.JPN/P7194/2013 | 2013            | Japan   | NA1      | Saikusa, M. et al.       |
| LC367146              | HRSV/Yokohama.JPN/P7204/2013 | 2013            | Japan   | NA1      | Saikusa, M. et al.       |
| LC367147              | HRSV/Yokohama.JPN/P7216/2013 | 2013            | Japan   | NA1      | Saikusa, M. et al.       |
| LC367148              | HRSV/Yokohama.JPN/P7218/2013 | 2013            | Japan   | NA1      | Saikusa, M. et al.       |
| LC367149              | HRSV/Yokohama.JPN/P7226/2013 | 2013            | Japan   | NA1      | Saikusa, M. et al.       |
| LC367150              | HRSV/Yokohama.JPN/P7232/2013 | 2013            | Japan   | NA1      | Saikusa, M. et al.       |
| LC367151              | HRSV/Yokohama.JPN/P7233/2013 | 2013            | Japan   | NA1      | Saikusa, M. et al.       |
| LC367152              | HRSV/Yokohama.JPN/P7239/2013 | 2013            | Japan   | NA1      | Saikusa, M. et al.       |
| LC367153              | HRSV/Yokohama.JPN/P7469/2014 | 2014            | Japan   | NA1      | Saikusa, M. et al.       |
| LC367161              | HRSV/Yokohama.JPN/P7620/2014 | 2014            | Japan   | NA1      | Saikusa, M. et al.       |
| LC367162              | HRSV/Yokohama.JPN/P7623/2014 | 2014            | Japan   | NA1      | Saikusa, M. et al.       |
| LC367163              | HRSV/Yokohama.JPN/P7624/2014 | 2014            | Japan   | NA1      | Saikusa, M. et al.       |
| LC367164              | HRSV/Yokohama.JPN/P7629/2014 | 2014            | Japan   | NA1      | Saikusa, M. et al.       |
| LC367166              | HRSV/Yokohama.JPN/P7683/2014 | 2014            | Japan   | NA1      | Saikusa, M. et al.       |
| LC367168              | HRSV/Yokohama.JPN/P7694/2014 | 2014            | Japan   | NA1      | Saikusa, M. et al.       |
| LC367172              | HRSV/Yokohama.JPN/P7714/2014 | 2014            | Japan   | NA1      | Saikusa, M. et al.       |
| LC367173              | HRSV/Yokohama.JPN/P7718/2014 | 2014            | Japan   | NA1      | Saikusa, M. et al.       |
| LC367174              | HRSV/Yokohama.JPN/P7744/2014 | 2014            | Japan   | NA1      | Saikusa, M. et al.       |
| LC367175              | HRSV/Yokohama.JPN/P7745/2014 | 2014            | Japan   | NA1      | Saikusa, M. et al.       |
| LC367176              | HRSV/Yokohama.JPN/P7764/2015 | 2015            | Japan   | NA1      | Saikusa, M. et al.       |
| LC367177              | HRSV/Yokohama.JPN/P7785/2015 | 2015            | Japan   | NA1      | Saikusa, M. et al.       |
| LC367178              | HRSV/Yokohama.JPN/P7795/2015 | 2015            | Japan   | NA1      | Saikusa, M. et al.       |
| LC367179              | HRSV/Yokohama.JPN/P7904/2015 | 2015            | Japan   | NA1      | Saikusa, M. et al.       |
| LC367182              | HRSV/Yokohama.JPN/P8106/2015 | 2015            | Japan   | NA1      | Saikusa, M. et al.       |
| LC367183              | HRSV/Yokohama.JPN/P8109/2015 | 2015            | Japan   | NA1      | Saikusa, M. et al.       |
| LC367184              | HRSV/Yokohama.JPN/P8112/2015 | 2015            | Japan   | NA1      | Saikusa, M. et al.       |
| LC367186              | HRSV/Yokohama.JPN/P8139/2015 | 2015            | Japan   | NA1      | Saikusa, M. et al.       |
| LC367188              | HRSV/Yokohama.JPN/P8153/2015 | 2015            | Japan   | NA1      | Saikusa, M. et al.       |
| LC367189              | HRSV/Yokohama.JPN/P8158/2015 | 2015            | Japan   | NA1      | Saikusa, M. et al.       |
| LC367190              | HRSV/Yokohama.JPN/P8176/2015 | 2015            | Japan   | NA1      | Saikusa, M. et al.       |
| LC367191              | HRSV/Yokohama.JPN/P8188/2015 | 2015            | Japan   | NA1      | Saikusa, M. et al.       |
| LC367192              | HRSV/Yokohama.JPN/P8197/2015 | 2015            | Japan   | NA1      | Saikusa, M. et al.       |
| LC367193              | HRSV/Yokohama.JPN/P8204/2015 | 2015            | Japan   | NA1      | Saikusa, M. et al.       |
| LC367194              | HRSV/Yokohama.JPN/P8217/2015 | 2015            | Japan   | NA1      | Saikusa, M. et al.       |
| LC367195              | HRSV/Yokohama.JPN/P8219/2015 | 2015            | Japan   | NA1      | Saikusa, M. et al.       |
| LC367196              | HRSV/Yokohama.JPN/P8237/2016 | 2016            | Japan   | NA1      | Saikusa, M. et al.       |
| LC367197              | HRSV/Yokohama.JPN/P8238/2016 | 2016            | Japan   | NA1      | Saikusa, M. et al.       |
| LC367198              | HRSV/Yokohama.JPN/P8242/2016 | 2016            | Japan   | NA1      | Saikusa, M. et al.       |
| LC367199              | HRSV/Yokohama.JPN/I927/2016  | 2016            | Japan   | NA1      | Saikusa, M. et al.       |
| LC367200              | HRSV/Yokohama.JPN/P8361/2016 | 2016            | Japan   | NA1      | Saikusa, M. et al.       |
| LC367202              | HRSV/Yokohama.JPN/P8392/2016 | 2016            | Japan   | NA1      | Saikusa, M. et al.       |
| LC367203              | HRSV/Yokohama.JPN/P8565/2016 | 2016            | Japan   | NA1      | Saikusa, M. et al.       |
| LC367206              | HRSV/Yokohama.JPN/P8575/2016 | 2016            | Japan   | NA1      | Saikusa, M. et al.       |
| LC367207              | HRSV/Yokohama.JPN/P8585/2016 | 2016            | Japan   | NA1      | Saikusa, M. et al.       |
| LC367208              | HRSV/Yokohama.JPN/P8594/2016 | 2016            | Japan   | NA1      | Saikusa, M. et al.       |
| LC367210              | HRSV/Yokohama.JPN/P8601/2016 | 2016            | Japan   | NA1      | Saikusa, M. et al.       |

---

|          |                              |      |             |     |                    |
|----------|------------------------------|------|-------------|-----|--------------------|
| LC367211 | HRSV/Yokohama.JPN/P8609/2016 | 2016 | Japan       | NA1 | Saikusa, M. et al. |
| LC367212 | HRSV/Yokohama.JPN/P8670/2016 | 2016 | Japan       | NA1 | Saikusa, M. et al. |
| LC367213 | HRSV/Yokohama.JPN/P8673/2016 | 2016 | Japan       | NA1 | Saikusa, M. et al. |
| LC367214 | HRSV/Yokohama.JPN/P8697/2016 | 2016 | Japan       | NA1 | Saikusa, M. et al. |
| LC367217 | HRSV/Yokohama.JPN/P8898/2017 | 2017 | Japan       | NA1 | Saikusa, M. et al. |
| LC367218 | HRSV/Yokohama.JPN/P8936/2017 | 2017 | Japan       | NA1 | Saikusa, M. et al. |
| LC367219 | HRSV/Yokohama.JPN/P8980/2017 | 2017 | Japan       | NA1 | Saikusa, M. et al. |
| LC377910 | TB5_CA-14-0345               | 2014 | Philippines | NA1 | 22                 |
| LC377911 | TB1_KW-14-0022               | 2014 | Philippines | NA1 | 22                 |
| LC474556 | RSV/A/NIID/2347/14           | 2014 | USA         | NA1 | Shirato, K. et al. |

---

**Supplementary Table S1** (continued). Strains used in this study.

| GenBank accession No. | Strain             | Collection year | Country | Genotype | References or authorship |
|-----------------------|--------------------|-----------------|---------|----------|--------------------------|
| LC474557              | RSV/A/NIID/2367/14 | 2014            | USA     | NA1      | Shirato, K. et al.       |
| LC474558              | RSV/A/NIID/2370/14 | 2014            | USA     | NA1      | Shirato, K. et al.       |
| LC530050              | sugckmmaht NGO3    | 2019            | Japan   | NA1      | Takeuchi, S. et al.      |
| MF001041              | 6A5                | 2015            | USA     | NA1      | Greninger, A.L. et al.   |
| MF001043              | 6A7                | 2015            | USA     | NA1      | Greninger, A.L. et al.   |
| MF001047              | 6O1                | 2015            | USA     | NA1      | Greninger, A.L. et al.   |
| MF001050              | 8P3                | 2015            | USA     | NA1      | Greninger, A.L. et al.   |
| MF001051              | 8P4                | 2015            | USA     | NA1      | Greninger, A.L. et al.   |
| MF001052              | 8P9                | 2015            | USA     | NA1      | Greninger, A.L. et al.   |
| MF001053              | 8Q1                | 2015            | USA     | NA1      | Greninger, A.L. et al.   |
| MF001054              | 8Q3                | 2015            | USA     | NA1      | Greninger, A.L. et al.   |
| MF001057              | 8S5                | 2015            | USA     | NA1      | Greninger, A.L. et al.   |
| MF361899              | MAD/GM2_2/12       | 2012            | Spain   | NA1      | 2                        |
| MF361901              | MAD/GM2_13/12      | 2012            | Spain   | NA1      | 2                        |
| MF361902              | MAD/GM2_14/12      | 2012            | Spain   | NA1      | 2                        |
| MF445909              | FJ121101-16        | 2012            | China   | NA1      | Su, Y. et al.            |
| MF445910              | FJ111121-12        | 2011            | China   | NA1      | Su, Y. et al.            |
| MF445912              | FJ130211-06        | 2013            | China   | NA1      | Su, Y. et al.            |
| MF445913              | FJ131204-24        | 2013            | China   | NA1      | Su, Y. et al.            |
| MF445915              | FJ141121-24        | 2014            | China   | NA1      | Su, Y. et al.            |
| MF445917              | FJ150219-36        | 2015            | China   | NA1      | Su, Y. et al.            |
| MF445918              | FJ150223-25        | 2015            | China   | NA1      | Su, Y. et al.            |
| MF445919              | FJ111207-05        | 2011            | China   | NA1      | Su, Y. et al.            |
| MF445920              | FJ121125-58        | 2012            | China   | NA1      | Su, Y. et al.            |
| MF445922              | FJ130314-07        | 2013            | China   | NA1      | Su, Y. et al.            |
| MF445923              | FJ130314-08        | 2013            | China   | NA1      | Su, Y. et al.            |
| MF445924              | FJ131007-09        | 2013            | China   | NA1      | Su, Y. et al.            |
| MF445925              | FJ131127-14        | 2013            | China   | NA1      | Su, Y. et al.            |
| MF445926              | FJ120326-15        | 2012            | China   | NA1      | Su, Y. et al.            |
| MF445928              | FJ141202-29        | 2014            | China   | NA1      | Su, Y. et al.            |
| MF445929              | FJ150112-24        | 2015            | China   | NA1      | Su, Y. et al.            |
| MF445930              | FJ150117-62        | 2015            | China   | NA1      | Su, Y. et al.            |
| MF445931              | FJ150204-34        | 2015            | China   | NA1      | Su, Y. et al.            |
| MF445932              | FJ150319-13        | 2015            | China   | NA1      | Su, Y. et al.            |
| MF445933              | FJ131212-17        | 2013            | China   | NA1      | Su, Y. et al.            |
| MF445934              | FJ120113-07        | 2012            | China   | NA1      | Su, Y. et al.            |
| MF445935              | FJ131128-19        | 2013            | China   | NA1      | Su, Y. et al.            |
| MF445936              | FJ131222-27        | 2013            | China   | NA1      | Su, Y. et al.            |
| MF445937              | FJ140104-09        | 2014            | China   | NA1      | Su, Y. et al.            |
| MF445938              | FJ140112-12        | 2014            | China   | NA1      | Su, Y. et al.            |
| MF445939              | FJ141121-25        | 2014            | China   | NA1      | Su, Y. et al.            |
| MF445940              | FJ141209-31        | 2014            | China   | NA1      | Su, Y. et al.            |
| MF445951              | FJ120121-36        | 2012            | China   | NA1      | Su, Y. et al.            |
| MF445952              | FJ111227-14        | 2011            | China   | NA1      | Su, Y. et al.            |
| MF445953              | FJ120108-05        | 2012            | China   | NA1      | Su, Y. et al.            |
| MF445954              | FJ120121-14        | 2012            | China   | NA1      | Su, Y. et al.            |
| MF445955              | FJ120129-13        | 2012            | China   | NA1      | Su, Y. et al.            |
| MF445956              | FJ120202-24        | 2012            | China   | NA1      | Su, Y. et al.            |
| MF445957              | FJ101227-13        | 2010            | China   | NA1      | Su, Y. et al.            |

---

|          |                    |      |       |     |                |
|----------|--------------------|------|-------|-----|----------------|
| MF445958 | FJ110101-11        | 2011 | China | NA1 | Su, Y. et al.  |
| MF445959 | FJ110328-24A       | 2011 | China | NA1 | Su, Y. et al.  |
| MF445960 | FJ110101-46        | 2011 | China | NA1 | Su, Y. et al.  |
| MF445961 | FJ110111-23        | 2011 | China | NA1 | Su, Y. et al.  |
| MF445962 | FJ110305-45        | 2011 | China | NA1 | Su, Y. et al.  |
| MF445963 | FJ111026-32        | 2011 | China | NA1 | Su, Y. et al.  |
| MF445964 | FJ111114-24        | 2011 | China | NA1 | Su, Y. et al.  |
| MF614946 | BJ/40180           | 2012 | China | NA1 | Cui, G. et al. |
| MF614947 | BJ/45117           | 2013 | China | NA1 | Cui, G. et al. |
| MF978510 | RSVA-CAP-1/BJ/2014 | 2014 | China | NA1 | 12             |

---

**Supplementary Table S1** (continued). Strains used in this study.

| GenBank accession No. | Strain                | Collection year | Country | Genotype | References or authorship |
|-----------------------|-----------------------|-----------------|---------|----------|--------------------------|
| MF978511              | RSVA-CAP-8/BJ/2014    | 2015            | China   | NA1      | 12                       |
| MF978513              | RSVA-CAP-10/BJ/2014   | 2014            | China   | NA1      | 12                       |
| MF978514              | RSVA-CAP-11/BJ/2014   | 2014            | China   | NA1      | 12                       |
| MF978515              | RSVA-CAP-14/BJ/2014   | 2014            | China   | NA1      | 12                       |
| MF978516              | RSVA-CAP-22/BJ/2014   | 2014            | China   | NA1      | 12                       |
| MF978517              | RSVA-CAP-30/BJ/2015   | 2015            | China   | NA1      | 12                       |
| MF978518              | RSVA-CAP-31/BJ/2015   | 2015            | China   | NA1      | 12                       |
| MF978519              | RSVA-CAP-33/BJ/2015   | 2015            | China   | NA1      | 12                       |
| MF978520              | RSVA-CAP-42/BJ/2015   | 2015            | China   | NA1      | 12                       |
| MF978521              | RSVA-CAP-43/BJ/2015   | 2015            | China   | NA1      | 12                       |
| MF978522              | RSVA-CAP-54/BJ/2015   | 2015            | China   | NA1      | 12                       |
| MF978523              | RSVA-CAP-56/BJ/2015   | 2015            | China   | NA1      | 12                       |
| MF978524              | RSVA-CAP-61/BJ/2015   | 2015            | China   | NA1      | 12                       |
| MF978525              | RSVA-CAP-66/BJ/2015   | 2015            | China   | NA1      | 12                       |
| MF978526              | RSVA-CAP-67/BJ/2015   | 2015            | China   | NA1      | 12                       |
| MF978527              | RSVA-CAP-92/BJ/2015   | 2015            | China   | NA1      | 12                       |
| MF978528              | RSVA-CAP-132/BJ/2015  | 2015            | China   | NA1      | 12                       |
| MF978529              | RSVA-CAP-234/BJ/2015  | 2015            | China   | NA1      | 12                       |
| MF978530              | RSVA-CAP-250/BJ/2015  | 2015            | China   | NA1      | 12                       |
| MF978531              | RSVA-CAP-255/BJ/2015  | 2015            | China   | NA1      | 12                       |
| MF978532              | RSVA-CAP-328/BJ/2015  | 2015            | China   | NA1      | 12                       |
| MF978533              | RSVA-CAP-356/BJ/2015  | 2015            | China   | NA1      | 12                       |
| MF978534              | RSVA-CAP-398/BJ/2015  | 2015            | China   | NA1      | 12                       |
| MF978535              | RSVA-CAP-402/BJ/2015  | 2015            | China   | NA1      | 12                       |
| MF978536              | RSVA-CAP-405/BJ/2016  | 2016            | China   | NA1      | 12                       |
| MF978537              | RSVB-CQ-115/CQ/2015   | 2015            | China   | NA1      | 12                       |
| MF978538              | RSVB-CQ-235/CQ/2015   | 2015            | China   | NA1      | 12                       |
| MF978539              | RSVA-GYYF-1/GZ/2015   | 2015            | China   | NA1      | 12                       |
| MF978540              | RSVA-GYYF-3/GZ/2015   | 2015            | China   | NA1      | 12                       |
| MF978541              | RSVA-GYYF-36/GZ/2015  | 2015            | China   | NA1      | 12                       |
| MF978542              | RSVA-GYYF-55/GZ/2015  | 2015            | China   | NA1      | 12                       |
| MF978543              | RSVA-GYYF-57/GZ/2015  | 2015            | China   | NA1      | 12                       |
| MF978544              | RSVA-GYYF-91/GZ/2015  | 2015            | China   | NA1      | 12                       |
| MF978545              | RSVA-GYYF-106/GZ/2016 | 2016            | China   | NA1      | 12                       |
| MF978546              | RSVA-GYYF-148/GZ/2016 | 2016            | China   | NA1      | 12                       |
| MF978547              | RSVA-GZFE-9/GZ/2015   | 2015            | China   | NA1      | 12                       |
| MF978548              | RSVA-GZFE-22/GZ/2015  | 2015            | China   | NA1      | 12                       |
| MF978549              | RSVA-GZFE-32/GZ/2015  | 2015            | China   | NA1      | 12                       |
| MF978550              | RSVA-GZFE-34/GZ/2015  | 2015            | China   | NA1      | 12                       |
| MF978551              | RSVA-GZFE-114/GZ/2015 | 2015            | China   | NA1      | 12                       |
| MF978552              | RSVA-GZFE-128/GZ/2015 | 2015            | China   | NA1      | 12                       |
| MF978553              | RSVA-GZFE-150/GZ/2015 | 2015            | China   | NA1      | 12                       |
| MF978554              | RSVA-HB-80/HeB/2014   | 2014            | China   | NA1      | 12                       |
| MF978555              | RSVA-HB-84/HeB/2014   | 2014            | China   | NA1      | 12                       |
| MF978556              | RSVA-HB-88/HeB/2014   | 2014            | China   | NA1      | 12                       |
| MF978557              | RSVA-HB-89/HeB/2014   | 2014            | China   | NA1      | 12                       |
| MF978558              | RSVA-HB-97/HeB/2014   | 2014            | China   | NA1      | 12                       |
| MF978559              | RSVA-HB-99/HeB/2014   | 2014            | China   | NA1      | 12                       |
| MF978561              | RSVA-HB-102/HeB/2014  | 2014            | China   | NA1      | 12                       |

---

|          |                      |      |       |     |    |
|----------|----------------------|------|-------|-----|----|
| MF978562 | RSVA-HB-197/HeB/2015 | 2015 | China | NA1 | 12 |
| MF978563 | RSVA-HB-216/HeB/2015 | 2015 | China | NA1 | 12 |
| MF978565 | RSVA-HB-251/HeB/2015 | 2015 | China | NA1 | 12 |
| MF978566 | RSVA-HB-263/HeB/2015 | 2015 | China | NA1 | 12 |
| MF978569 | RSVA-HB-274/HeB/2015 | 2015 | China | NA1 | 12 |
| MF978570 | RSVA-HB-276/HeB/2015 | 2015 | China | NA1 | 12 |
| MF978571 | RSVA-HB-277/HeB/2015 | 2015 | China | NA1 | 12 |
| MF978572 | RSVA-HB-279/HeB/2015 | 2015 | China | NA1 | 12 |
| MF978573 | RSVA-HB-294/HeB/2016 | 2016 | China | NA1 | 12 |
| MF978574 | RSVA-HB-297/HeB/2016 | 2016 | China | NA1 | 12 |

---

**Supplementary Table S1** (continued). Strains used in this study.

| GenBank accession No. | Strain               | Collection year | Country | Genotype | References or authorship |
|-----------------------|----------------------|-----------------|---------|----------|--------------------------|
| MF978575              | RSVA-HB-307/HeB/2016 | 2016            | China   | NA1      | 12                       |
| MF978576              | RSVA-HB-312/HeB/2016 | 2016            | China   | NA1      | 12                       |
| MF978578              | RSVA-WZ-6/ZJ/2015    | 2015            | China   | NA1      | 12                       |
| MF978579              | RSVA-WZ-10/ZJ/2015   | 2015            | China   | NA1      | 12                       |
| MF978581              | RSVA-WZ-16/ZJ/2015   | 2015            | China   | NA1      | 12                       |
| MF978582              | RSVA-WZ-17/ZJ/2015   | 2015            | China   | NA1      | 12                       |
| MF978583              | RSVA-WZ-19/ZJ/2015   | 2015            | China   | NA1      | 12                       |
| MF978584              | RSVA-WZ-20/ZJ/2015   | 2015            | China   | NA1      | 12                       |
| MF978585              | RSVA-WZ-23/ZJ/2015   | 2015            | China   | NA1      | 12                       |
| MF978586              | RSVA-WZ-26/ZJ/2015   | 2015            | China   | NA1      | 12                       |
| MF978587              | RSVA-WZ-28/ZJ/2015   | 2015            | China   | NA1      | 12                       |
| MF978589              | RSVA-WZ-33/ZJ/2015   | 2015            | China   | NA1      | 12                       |
| MF978591              | RSVA-WZ-38/ZJ/2015   | 2015            | China   | NA1      | 12                       |
| MF978592              | RSVA-WZ-40/ZJ/2015   | 2015            | China   | NA1      | 12                       |
| MF978595              | RSVA-WZ-44/ZJ/2015   | 2015            | China   | NA1      | 12                       |
| MF978596              | RSVA-WZ-47/ZJ/2015   | 2015            | China   | NA1      | 12                       |
| MF978598              | RSVA-WZ-52/ZJ/2015   | 2015            | China   | NA1      | 12                       |
| MF978599              | RSVA-WZ-53/ZJ/2015   | 2015            | China   | NA1      | 12                       |
| MF978600              | RSVA-WZ-57/ZJ/2015   | 2015            | China   | NA1      | 12                       |
| MF978601              | RSVA-WZ-60/ZJ/2015   | 2015            | China   | NA1      | 12                       |
| MF978603              | RSVA-WZ-64/ZJ/2015   | 2015            | China   | NA1      | 12                       |
| MF978605              | RSVA-WZ-68/ZJ/2015   | 2015            | China   | NA1      | 12                       |
| MF978606              | RSVA-WZ-72/ZJ/2015   | 2015            | China   | NA1      | 12                       |
| MF978607              | RSVA-WZ-73/ZJ/2015   | 2015            | China   | NA1      | 12                       |
| MF978608              | RSVA-WZ-76/ZJ/2015   | 2015            | China   | NA1      | 12                       |
| MF978609              | RSVA-WZ-79/ZJ/2015   | 2015            | China   | NA1      | 12                       |
| MF978610              | RSVA-WZ-82/ZJ/2015   | 2015            | China   | NA1      | 12                       |
| MF978611              | RSVA-WZ-84/ZJ/2015   | 2015            | China   | NA1      | 12                       |
| MF978612              | RSVA-WZ-85/ZJ/2015   | 2015            | China   | NA1      | 12                       |
| MF978613              | RSVA-WZ-92/ZJ/2015   | 2015            | China   | NA1      | 12                       |
| MF978614              | RSVA-WZ-94/ZJ/2015   | 2015            | China   | NA1      | 12                       |
| MF978615              | RSVA-WZ-101/ZJ/2015  | 2015            | China   | NA1      | 12                       |
| MF978617              | RSVA-WZ-109/ZJ/2015  | 2015            | China   | NA1      | 12                       |
| MF978618              | RSVA-WZ-113/ZJ/2015  | 2015            | China   | NA1      | 12                       |
| MF978619              | RSVA-WZ-114/ZJ/2015  | 2015            | China   | NA1      | 12                       |
| MF978620              | RSVA-WZ-117/ZJ/2015  | 2015            | China   | NA1      | 12                       |
| MF978621              | RSVA-WZ-122/ZJ/2015  | 2015            | China   | NA1      | 12                       |
| MF978622              | RSVA-WZ-123/ZJ/2015  | 2015            | China   | NA1      | 12                       |
| MF978623              | RSVA-WZ-127/ZJ/2015  | 2015            | China   | NA1      | 12                       |
| MF978624              | RSVA-WZ-128/ZJ/2015  | 2015            | China   | NA1      | 12                       |
| MF978626              | RSVA-WZ-133/ZJ/2015  | 2015            | China   | NA1      | 12                       |
| MF978627              | RSVA-WZ-135/ZJ/2015  | 2015            | China   | NA1      | 12                       |
| MF978628              | RSVA-WZ-154/ZJ/2015  | 2015            | China   | NA1      | 12                       |
| MF978629              | RSVA-WZ-160/ZJ/2015  | 2015            | China   | NA1      | 12                       |
| MF978630              | RSVA-WZ-168/ZJ/2015  | 2015            | China   | NA1      | 12                       |
| MF978631              | RSVA-WZ-169/ZJ/2015  | 2015            | China   | NA1      | 12                       |
| MF978633              | RSVA-WZ-182/ZJ/2015  | 2015            | China   | NA1      | 12                       |
| MF978634              | RSVB-WZ-183/ZJ/2015  | 2015            | China   | NA1      | 12                       |
| MF978638              | RSVA-WZ-192/ZJ/2015  | 2015            | China   | NA1      | 12                       |

---

|          |                     |      |       |     |    |
|----------|---------------------|------|-------|-----|----|
| MF978639 | RSVA-WZ-193/ZJ/2015 | 2015 | China | NA1 | 12 |
| MF978640 | RSVA-WZ-195/ZJ/2015 | 2015 | China | NA1 | 12 |
| MF978642 | RSVA-WZ-207/ZJ/2015 | 2015 | China | NA1 | 12 |
| MF978643 | RSVA-WZ-208/ZJ/2015 | 2015 | China | NA1 | 12 |
| MF978644 | RSVA-WZ-213/ZJ/2015 | 2015 | China | NA1 | 12 |
| MF978645 | RSVA-WZ-215/ZJ/2015 | 2015 | China | NA1 | 12 |
| MF978646 | RSVA-WZ-217/ZJ/2015 | 2015 | China | NA1 | 12 |
| MF978647 | RSVA-WZ-220/ZJ/2015 | 2015 | China | NA1 | 12 |
| MF978648 | RSVA-WZ-221/ZJ/2015 | 2015 | China | NA1 | 12 |
| MF978649 | RSVA-WZ-232/ZJ/2015 | 2015 | China | NA1 | 12 |

---



**Supplementary Table S1** (continued). Strains used in this study.

| GenBank accession No. | Strain                          | Collection year | Country   | Genotype | References or authorship |
|-----------------------|---------------------------------|-----------------|-----------|----------|--------------------------|
| MF978651              | RSVA-WZ-285/ZJ/2015             | 2015            | China     | NA1      | 12                       |
| MF978652              | RSVA-WZ-287/ZJ/2015             | 2015            | China     | NA1      | 12                       |
| MF978653              | RSVA-WZ-288/ZJ/2015             | 2015            | China     | NA1      | 12                       |
| MF978654              | RSVA-WZ-336/ZJ/2015             | 2015            | China     | NA1      | 12                       |
| MF978655              | RSVA-WZ-348/ZJ/2015             | 2015            | China     | NA1      | 12                       |
| MF978656              | RSVA-WZ-351/ZJ/2015             | 2015            | China     | NA1      | 12                       |
| MF978657              | RSVA-WZ-358/ZJ/2015             | 2015            | China     | NA1      | 12                       |
| MF978658              | RSVA-WZ-407/ZJ/2015             | 2015            | China     | NA1      | 12                       |
| MF978659              | RSVA-WZ-441/ZJ/2015             | 2015            | China     | NA1      | 12                       |
| MF978660              | RSVA-WZ-460/ZJ/2015             | 2015            | China     | NA1      | 12                       |
| MF978661              | RSVA-WZ-466/ZJ/2015             | 2015            | China     | NA1      | 12                       |
| MF978663              | RSVA-WZ-490/ZJ/2015             | 2015            | China     | NA1      | 12                       |
| MF978664              | RSVA-WZ-492/ZJ/2015             | 2015            | China     | NA1      | 12                       |
| MF978665              | RSVA-WZ-516/ZJ/2015             | 2015            | China     | NA1      | 12                       |
| MF978666              | RSVA-WZ-536/ZJ/2015             | 2015            | China     | NA1      | 12                       |
| MF978667              | RSVA-YC-161/NX/2015             | 2015            | China     | NA1      | 12                       |
| MF978668              | RSVA-YC-177/NX/2015             | 2015            | China     | NA1      | 12                       |
| MF978669              | RSVA-YC-187/NX/2015             | 2015            | China     | NA1      | 12                       |
| MF978670              | RSVA-YC-188/NX/2015             | 2015            | China     | NA1      | 12                       |
| MF978671              | RSVA-YC-195/NX/2015             | 2015            | China     | NA1      | 12                       |
| MF978672              | RSVA-YC-200/NX/2015             | 2015            | China     | NA1      | 12                       |
| MF978673              | RSVA-YC-202/NX/2015             | 2015            | China     | NA1      | 12                       |
| MF978674              | RSVA-ZJ-276/ZJ/2015             | 2015            | China     | NA1      | 12                       |
| MF978675              | RSVA-ZJ-288/ZJ/2015             | 2015            | China     | NA1      | 12                       |
| MF978676              | RSVA-ZJ-290/ZJ/2015             | 2015            | China     | NA1      | 12                       |
| MF978677              | RSVA-ZJ-296/ZJ/2015             | 2015            | China     | NA1      | 12                       |
| MF978678              | RSVA-ZJ-298/ZJ/2015             | 2015            | China     | NA1      | 12                       |
| MF978679              | RSVA-ZJ-299/ZJ/2015             | 2015            | China     | NA1      | 12                       |
| MF978680              | RSVA-ZJ-301/ZJ/2015             | 2015            | China     | NA1      | 12                       |
| MF978681              | RSVA-ZJ-302/ZJ/2015             | 2015            | China     | NA1      | 12                       |
| MF978682              | RSVA-ZJ-303/ZJ/2015             | 2015            | China     | NA1      | 12                       |
| MF978683              | RSVA-ZJ-310/ZJ/2015             | 2015            | China     | NA1      | 12                       |
| MF978684              | RSVA-ZJ-315/ZJ/2015             | 2015            | China     | NA1      | 12                       |
| MF978685              | RSVA-ZJ-323/ZJ/2015             | 2015            | China     | NA1      | 12                       |
| MF978686              | RSVA-ZJ-325/ZJ/2015             | 2015            | China     | NA1      | 12                       |
| MF978687              | RSVA-ZJ-332/ZJ/2015             | 2015            | China     | NA1      | 12                       |
| MF978689              | RSVA-ZJ-348/ZJ/2015             | 2015            | China     | NA1      | 12                       |
| MF978691              | RSVA-ZJ-369/ZJ/2015             | 2015            | China     | NA1      | 12                       |
| MF978692              | RSVA-ZJ-398/ZJ/2015             | 2015            | China     | NA1      | 12                       |
| MG431254              | STA836                          | 2010            | Brazil    | NA1      | Di Paola, N. et al.      |
| MG431255              | STA839                          | 2010            | Brazil    | NA1      | Di Paola, N. et al.      |
| MG773271              | HRSV/A/BuenosAires/ARG/011/2016 | 2016            | Argentina | NA1      | 23                       |
| MG793382              | RSVA/Lebanon/14LJF289/2015      | 2015            | Lebanon   | NA1      | Ezzeddine, A.M.          |
| MG813979              | A-TX-009b-2012-WGS              | 2012            | USA       | NA1      | Piedra, F.-A. et al.     |
| MG813983              | A-TX-032b-2012-WGS              | 2012            | USA       | NA1      | Piedra, F.-A. et al.     |
| MG813985              | A-TX-010b-2014-WGS              | 2014            | USA       | NA1      | Piedra, F.-A. et al.     |
| MG813987              | A-TX-012b-2015-WGS              | 2015            | USA       | NA1      | Piedra, F.-A. et al.     |
| MG813991              | A-TX-018b-2012-WGS              | 2012            | USA       | NA1      | Piedra, F.-A. et al.     |
| MG839543              | HRSV/A/BuenosAires/ARG/012/2015 | 2015            | Argentina | NA1      | 23                       |

---

|          |                                |      |       |     |    |
|----------|--------------------------------|------|-------|-----|----|
| MH181878 | KEN/KILIFI/WGS/1022_28/12/2011 | 2011 | Kenya | NA1 | 24 |
| MH181881 | KEN/KILIFI/WGS/1028_02/03/2012 | 2012 | Kenya | NA1 | 24 |
| MH181885 | KEN/KILIFI/WGS/1039_25/03/2012 | 2012 | Kenya | NA1 | 24 |
| MH181888 | KEN/KILIFI/WGS/1047_15/04/2012 | 2012 | Kenya | NA1 | 24 |
| MH181889 | KEN/KILIFI/WGS/1048_16/04/2012 | 2012 | Kenya | NA1 | 24 |
| MH181890 | KEN/KILIFI/WGS/1049_17/04/2012 | 2012 | Kenya | NA1 | 24 |
| MH181891 | KEN/KILIFI/WGS/1050_17/04/2012 | 2012 | Kenya | NA1 | 24 |
| MH181892 | KEN/KILIFI/WGS/1052_25/04/2012 | 2012 | Kenya | NA1 | 24 |
| MH181893 | KEN/KILIFI/WGS/1064_24/06/2012 | 2012 | Kenya | NA1 | 24 |
| MH181894 | KEN/KILIFI/WGS/1067_30/06/2012 | 2012 | Kenya | NA1 | 24 |

---

**Supplementary Table S1** (continued). Strains used in this study.

| GenBank accession No. | Strain                         | Collection year | Country | Genotype | References or authorship |
|-----------------------|--------------------------------|-----------------|---------|----------|--------------------------|
| MH181895              | KEN/KILIFI/WGS/1101_25/11/2012 | 2012            | Kenya   | NA1      | 24                       |
| MH181897              | KEN/KILIFI/WGS/1138_14/01/2013 | 2013            | Kenya   | NA1      | 24                       |
| MH181898              | KEN/KILIFI/WGS/1146_03/02/2013 | 2013            | Kenya   | NA1      | 24                       |
| MH181901              | KEN/KILIFI/WGS/1155_13/03/2013 | 2013            | Kenya   | NA1      | 24                       |
| MH181902              | KEN/KILIFI/WGS/1159_24/05/2013 | 2013            | Kenya   | NA1      | 24                       |
| MH181904              | KEN/KILIFI/WGS/1169_07/11/2013 | 2013            | Kenya   | NA1      | 24                       |
| MH181905              | KEN/KILIFI/WGS/1215_15/04/2014 | 2014            | Kenya   | NA1      | 24                       |
| MH181906              | KEN/KILIFI/WGS/1314_31/03/2015 | 2015            | Kenya   | NA1      | 24                       |
| MH181907              | KEN/KILIFI/WGS/1322_17/04/2014 | 2015            | Kenya   | NA1      | 24                       |
| MH181910              | KEN/KILIFI/WGS/1033_09/03/2012 | 2012            | Kenya   | NA1      | 24                       |
| MH181911              | KEN/KILIFI/WGS/1034_11/03/2012 | 2012            | Kenya   | NA1      | 24                       |
| MH181915              | KEN/KILIFI/WGS/1040_26/03/2012 | 2012            | Kenya   | NA1      | 24                       |
| MH181916              | KEN/KILIFI/WGS/1041_29/03/2012 | 2012            | Kenya   | NA1      | 24                       |
| MH181918              | KEN/KILIFI/WGS/1044_10/04/2012 | 2012            | Kenya   | NA1      | 24                       |
| MH181920              | KEN/KILIFI/WGS/1053_26/04/2012 | 2012            | Kenya   | NA1      | 24                       |
| MH181925              | KEN/KILIFI/WGS/1060_11/06/2012 | 2012            | Kenya   | NA1      | 24                       |
| MH181928              | KEN/KILIFI/WGS/1063_18/06/2012 | 2012            | Kenya   | NA1      | 24                       |
| MH181929              | KEN/KILIFI/WGS/1066_28/06/2012 | 2012            | Kenya   | NA1      | 24                       |
| MH181931              | KEN/KILIFI/WGS/1070_23/07/2012 | 2012            | Kenya   | NA1      | 24                       |
| MH181933              | KEN/KILIFI/WGS/1075_27/10/2012 | 2012            | Kenya   | NA1      | 24                       |
| MH181938              | KEN/KILIFI/WGS/1080_05/11/2012 | 2012            | Kenya   | NA1      | 24                       |
| MH181940              | KEN/KILIFI/WGS/1082_10/11/2012 | 2012            | Kenya   | NA1      | 24                       |
| MH181941              | KEN/KILIFI/WGS/1083_12/11/2012 | 2012            | Kenya   | NA1      | 24                       |
| MH181943              | KEN/KILIFI/WGS/1086_15/11/2012 | 2012            | Kenya   | NA1      | 24                       |
| MH181950              | KEN/KILIFI/WGS/1093_23/11/2012 | 2012            | Kenya   | NA1      | 24                       |
| MH181953              | KEN/KILIFI/WGS/1096_24/11/2012 | 2012            | Kenya   | NA1      | 24                       |
| MH181954              | KEN/KILIFI/WGS/1097_24/11/2012 | 2012            | Kenya   | NA1      | 24                       |
| MH181959              | KEN/KILIFI/WGS/1103_27/11/2012 | 2012            | Kenya   | NA1      | 24                       |
| MH181960              | KEN/KILIFI/WGS/1104_27/11/2012 | 2012            | Kenya   | NA1      | 24                       |
| MH181967              | KEN/KILIFI/WGS/1113_03/12/2012 | 2012            | Kenya   | NA1      | 24                       |
| MH181969              | KEN/KILIFI/WGS/1115_04/12/2012 | 2012            | Kenya   | NA1      | 24                       |
| MH181971              | KEN/KILIFI/WGS/1118_12/12/2012 | 2012            | Kenya   | NA1      | 24                       |
| MH181972              | KEN/KILIFI/WGS/1119_15/12/2012 | 2012            | Kenya   | NA1      | 24                       |
| MH181973              | KEN/KILIFI/WGS/1120_19/12/2012 | 2012            | Kenya   | NA1      | 24                       |
| MH181974              | KEN/KILIFI/WGS/1121_21/12/2012 | 2012            | Kenya   | NA1      | 24                       |
| MH181976              | KEN/KILIFI/WGS/1124_24/12/2012 | 2012            | Kenya   | NA1      | 24                       |
| MH181977              | KEN/KILIFI/WGS/1125_26/12/2012 | 2012            | Kenya   | NA1      | 24                       |
| MH181980              | KEN/KILIFI/WGS/1129_08/01/2013 | 2013            | Kenya   | NA1      | 24                       |
| MH181982              | KEN/KILIFI/WGS/1132_11/01/2013 | 2013            | Kenya   | NA1      | 24                       |
| MH181984              | KEN/KILIFI/WGS/1134_12/01/2013 | 2013            | Kenya   | NA1      | 24                       |
| MH181985              | KEN/KILIFI/WGS/1140_17/01/2013 | 2013            | Kenya   | NA1      | 24                       |
| MH181987              | KEN/KILIFI/WGS/1142_21/01/2013 | 2013            | Kenya   | NA1      | 24                       |
| MH181988              | KEN/KILIFI/WGS/1144_24/01/2013 | 2013            | Kenya   | NA1      | 24                       |
| MH181989              | KEN/KILIFI/WGS/1151_10/02/2013 | 2013            | Kenya   | NA1      | 24                       |
| MH181990              | KEN/KILIFI/WGS/1153_12/03/2013 | 2013            | Kenya   | NA1      | 24                       |
| MH181991              | KEN/KILIFI/WGS/1162_12/10/2013 | 2013            | Kenya   | NA1      | 24                       |
| MH181993              | KEN/KILIFI/WGS/1166_28/10/2013 | 2013            | Kenya   | NA1      | 24                       |
| MH181996              | KEN/KILIFI/WGS/1171_12/11/2013 | 2013            | Kenya   | NA1      | 24                       |
| MH181997              | KEN/KILIFI/WGS/1173_19/11/2013 | 2013            | Kenya   | NA1      | 24                       |

---

|          |                                |      |       |     |    |
|----------|--------------------------------|------|-------|-----|----|
| MH181998 | KEN/Kilifi/WGS/1582_01/04/2014 | 2014 | Kenya | NA1 | 24 |
| MH181999 | KEN/Kilifi/WGS/1583_13/04/2014 | 2014 | Kenya | NA1 | 24 |
| MH182001 | KEN/KILIFI/WGS/1246_26/11/2014 | 2014 | Kenya | NA1 | 24 |
| MH182005 | KEN/KILIFI/WGS/1251_06/12/2014 | 2014 | Kenya | NA1 | 24 |
| MH182010 | KEN/KILIFI/WGS/1257_10/12/2014 | 2014 | Kenya | NA1 | 24 |
| MH182012 | KEN/KILIFI/WGS/1260_14/12/2014 | 2014 | Kenya | NA1 | 24 |
| MH182016 | KEN/KILIFI/WGS/1266_17/12/2014 | 2014 | Kenya | NA1 | 24 |
| MH182018 | KEN/KILIFI/WGS/1269_17/12/2014 | 2014 | Kenya | NA1 | 24 |
| MH182019 | KEN/KILIFI/WGS/1271_18/12/2014 | 2014 | Kenya | NA1 | 24 |
| MH182021 | KEN/KILIFI/WGS/1274_21/12/2014 | 2014 | Kenya | NA1 | 24 |

---

**Supplementary Table S1** (continued). Strains used in this study.

| GenBank accession No. | Strain                          | Collection year | Country | Genotype | References or authorship |
|-----------------------|---------------------------------|-----------------|---------|----------|--------------------------|
| MH182022              | KEN/KILIFI/WGS/1275_22/12/2014  | 2014            | Kenya   | NA1      | 24                       |
| MH182023              | KEN/KILIFI/WGS/1278_25/12/2014  | 2014            | Kenya   | NA1      | 24                       |
| MH182024              | KEN/KILIFI/WGS/1279_27/12/2014  | 2014            | Kenya   | NA1      | 24                       |
| MH182025              | KEN/KILIFI/WGS/1281_30/12/2014  | 2014            | Kenya   | NA1      | 24                       |
| MH182026              | KEN/KILIFI/WGS/1282_31/12/2014  | 2014            | Kenya   | NA1      | 24                       |
| MH182027              | KEN/KILIFI/WGS/1283_31/12/2014  | 2014            | Kenya   | NA1      | 24                       |
| MH182029              | KEN/KILIFI/WGS/1286_04/01/2015  | 2015            | Kenya   | NA1      | 24                       |
| MH182030              | KEN/KILIFI/WGS/1287_06/01/2015  | 2015            | Kenya   | NA1      | 24                       |
| MH182031              | KEN/KILIFI/WGS/1288_07/01/2015  | 2015            | Kenya   | NA1      | 24                       |
| MH182032              | KEN/KILIFI/WGS/1289_08/01/2015  | 2015            | Kenya   | NA1      | 24                       |
| MH182033              | KEN/KILIFI/WGS/1290_08/01/2015  | 2015            | Kenya   | NA1      | 24                       |
| MH182035              | KEN/KILIFI/WGS/1293_24/01/2015  | 2015            | Kenya   | NA1      | 24                       |
| MH182036              | KEN/KILIFI/WGS/1295_27/01/2015  | 2015            | Kenya   | NA1      | 24                       |
| MH182037              | KEN/KILIFI/WGS/1296_29/01/2015  | 2015            | Kenya   | NA1      | 24                       |
| MH182038              | KEN/KILIFI/WGS/1298_31/01/2015  | 2015            | Kenya   | NA1      | 24                       |
| MH182039              | KEN/KILIFI/WGS/1299_04/02/2015  | 2015            | Kenya   | NA1      | 24                       |
| MH182040              | KEN/KILIFI/WGS/1301_08/02/2015  | 2015            | Kenya   | NA1      | 24                       |
| MH182041              | KEN/KILIFI/WGS/1302_13/02/2015  | 2015            | Kenya   | NA1      | 24                       |
| MH182042              | KEN/KILIFI/WGS/1305_21/02/2015  | 2015            | Kenya   | NA1      | 24                       |
| MH182046              | KEN/KILIFI/WGS/1311_21/03/2015  | 2015            | Kenya   | NA1      | 24                       |
| MH182047              | KEN/KILIFI/WGS/1312_22/03/2015  | 2015            | Kenya   | NA1      | 24                       |
| MH182048              | KEN/KILIFI/WGS/1313_27/03/2015  | 2015            | Kenya   | NA1      | 24                       |
| MH182050              | KEN/KILIFI/WGS/1318_08/04/2015  | 2015            | Kenya   | NA1      | 24                       |
| MH182051              | KEN/KILIFI/WGS/1320_12/04/2015  | 2015            | Kenya   | NA1      | 24                       |
| MH182052              | KEN/KILIFI/WGS/1321_17/04/2015  | 2015            | Kenya   | NA1      | 24                       |
| MH182054              | KEN/Kilifi/WGS/1585_17/02/2016  | 2016            | Kenya   | NA1      | 24                       |
| MH182055              | KEN/Kilifi/WGS/1586_28/01/2016  | 2016            | Kenya   | NA1      | 24                       |
| MH182056              | KEN/Kilifi/WGS/1587_08/02/2016  | 2016            | Kenya   | NA1      | 24                       |
| MH182057              | KEN/Kilifi/WGS/1588_29/03/2016  | 2016            | Kenya   | NA1      | 24                       |
| MH182058              | KEN/Kilifi/WGS/1589_26/01/2016  | 2016            | Kenya   | NA1      | 24                       |
| MH182059              | KEN/Kilifi/WGS/1590_01/02/2016  | 2016            | Kenya   | NA1      | 24                       |
| MH182060              | KEN/Kilifi/WGS/1591_18/01/2016  | 2016            | Kenya   | NA1      | 24                       |
| MH182061              | KEN/Kilifi/WGS/1592_07/04/2016  | 2016            | Kenya   | NA1      | 24                       |
| MH187282              | RSVs/Tehran.IRN/A/53.15/2 [ON1] | 2015            | Iran    | NA1      | Salimi, V. et al.        |
| MH187283              | RSVs/Tehran.IRN/A/53.15/4 [ON1] | 2015            | Iran    | NA1      | Salimi, V. et al.        |
| MH187284              | RSVs/Tehran.IRN/A/1.16/1 [ON1]  | 2016            | Iran    | NA1      | Salimi, V. et al.        |
| MH187285              | RSVs/Tehran.IRN/A/1.16/8 [ON1]  | 2016            | Iran    | NA1      | Salimi, V. et al.        |
| MH187286              | RSVs/Tehran.IRN/A/1.16/11 [ON1] | 2016            | Iran    | NA1      | Salimi, V. et al.        |
| MH187287              | RSV/Tehran.IRN/A/1.16/12 [ON1]  | 2016            | Iran    | NA1      | Salimi, V. et al.        |
| MH187288              | RSVs/Tehran.IRN/A/1.16/13 [ON1] | 2016            | Iran    | NA1      | Salimi, V. et al.        |
| MH187289              | RSVs/Tehran.IRN/A/2.16/1 [ON1]  | 2016            | Iran    | NA1      | Salimi, V. et al.        |
| MH187290              | RSVs/Tehran.IRN/A/2.16/2 [ON1]  | 2016            | Iran    | NA1      | Salimi, V. et al.        |
| MH187291              | RSVs/Tehran.IRN/A/2.16/3 [ON1]  | 2016            | Iran    | NA1      | Salimi, V. et al.        |
| MH187292              | RSVs/Tehran.IRN/A/3.16/5 [ON1]  | 2016            | Iran    | NA1      | Salimi, V. et al.        |
| MH187293              | RSVs/Tehran.IRN/A/3.16/8 [ON1]  | 2016            | Iran    | NA1      | Salimi, V. et al.        |
| MH187294              | RSVs/Tehran.IRN/A/4.16/1 [ON1]  | 2016            | Iran    | NA1      | Salimi, V. et al.        |
| MH187295              | RSVs/Tehran.IRN/A/4.16/2 [ON1]  | 2016            | Iran    | NA1      | Salimi, V. et al.        |
| MH187296              | RSVs/Tehran.IRN/A/4.16/4 [ON1]  | 2016            | Iran    | NA1      | Salimi, V. et al.        |
| MH187297              | RSVs/Tehran.IRN/A/4.16/5 [ON1]  | 2016            | Iran    | NA1      | Salimi, V. et al.        |

---

|          |                                 |      |      |     |                   |
|----------|---------------------------------|------|------|-----|-------------------|
| MH187298 | RSVs/Tehran.IRN/A/4.16/7 [ON1]  | 2016 | Iran | NA1 | Salimi, V. et al. |
| MH187299 | RSVs/Tehran.IRN/A/4.16/10 [ON1] | 2016 | Iran | NA1 | Salimi, V. et al. |
| MH187300 | RSVs/Tehran.IRN/A/5.16/1 [ON1]  | 2016 | Iran | NA1 | Salimi, V. et al. |
| MH187301 | RSVs/Tehran.IRN/A/6.16/1 [ON1]  | 2016 | Iran | NA1 | Salimi, V. et al. |
| MH187302 | RSVs/Tehran.IRN/A/6.16/2 [ON1]  | 2016 | Iran | NA1 | Salimi, V. et al. |
| MH187303 | RSVs/Tehran.IRN/A/6.16/3 [ON1]  | 2016 | Iran | NA1 | Salimi, V. et al. |
| MH187304 | RSVs/Tehran.IRN/A/7.16/3 [ON1]  | 2016 | Iran | NA1 | Salimi, V. et al. |
| MH187305 | RSVs/Tehran.IRN/A/7.16/2 [ON1]  | 2016 | Iran | NA1 | Salimi, V. et al. |
| MH187306 | RSVs/Tehran.IRN/A/8.16/1 [ON1]  | 2016 | Iran | NA1 | Salimi, V. et al. |
| MH187307 | RSVs/Tehran.IRN/A/8.16/2 [ON1]  | 2016 | Iran | NA1 | Salimi, V. et al. |

---

**Supplementary Table S1** (continued). Strains used in this study.

| GenBank accession No. | Strain                          | Collection year | Country   | Genotype | References or authorship |
|-----------------------|---------------------------------|-----------------|-----------|----------|--------------------------|
| MH187308              | RSVs/Tehran.IRN/A/11.16/1 [ON1] | 2016            | Iran      | NA1      | Salimi, V. et al.        |
| MH279547              | LZ170020448/17                  | 2017            | China     | NA1      | Qiao, R. et al.          |
| MH290724              | LZ170020467/17                  | 2017            | China     | NA1      | Qiao, R. et al.          |
| MH383066              | JF204                           | 2014            | Lebanon   | NA1      | Hamdan, F. et al.        |
| MH447951              | TH/CU91/2011                    | 2011            | Thailand  | NA1      | Thongpan, I.             |
| MH447952              | TH/C3208/2012                   | 2012            | Thailand  | NA1      | Thongpan, I.             |
| MH447954              | TH/CB135/2013                   | 2013            | Thailand  | NA1      | Thongpan, I.             |
| MH447955              | TH/B10625/2014                  | 2014            | Thailand  | NA1      | Thongpan, I.             |
| MH447956              | TH/B10806/2014                  | 2014            | Thailand  | NA1      | Thongpan, I.             |
| MH447957              | TH/B18177/2016                  | 2016            | Thailand  | NA1      | Thongpan, I.             |
| MH447958              | TH/B18247/2016                  | 2016            | Thailand  | NA1      | Thongpan, I.             |
| MH447959              | TH/B23576/2017                  | 2017            | Thailand  | NA1      | Thongpan, I.             |
| MH447960              | TH/B23964/2017                  | 2017            | Thailand  | NA1      | Thongpan, I.             |
| MH760588              | A/NSW/WM0301A/16                | 2016            | Australia | NA1      | 13                       |
| MH760589              | A/NSW/WM3629A/16                | 2016            | Australia | NA1      | 13                       |
| MH760591              | A/NSW/WM1734B/16                | 2016            | Australia | NA1      | 13                       |
| MH760592              | A/NSW/WM0276A/10                | 2010            | Australia | NA1      | 13                       |
| MH760593              | A/NSW/WM0231A/10                | 2010            | Australia | NA1      | 13                       |
| MH760594              | A/NSW/WM3702A/10                | 2010            | Australia | NA1      | 13                       |
| MH760595              | A/NSW/WM0484A/10                | 2010            | Australia | NA1      | 13                       |
| MH760596              | A/NSW/WM1135A/10                | 2010            | Australia | NA1      | 13                       |
| MH760597              | A/NSW/WM2192A/10                | 2010            | Australia | NA1      | 13                       |
| MH760598              | A/NSW/WM1654C/10                | 2010            | Australia | NA1      | 13                       |
| MH760600              | A/NSW/WM4173A/11                | 2011            | Australia | NA1      | 13                       |
| MH760601              | A/NSW/WM0597B/12                | 2012            | Australia | NA1      | 13                       |
| MH760602              | A/NSW/WM1236A/12                | 2012            | Australia | NA1      | 13                       |
| MH760603              | A/NSW/WM2829A/12                | 2012            | Australia | NA1      | 13                       |
| MH760604              | A/NSW/WM4460A/12                | 2012            | Australia | NA1      | 13                       |
| MH760605              | A/NSW/WM1837A/12                | 2012            | Australia | NA1      | 13                       |
| MH760606              | A/NSW/WM1008A/13                | 2013            | Australia | NA1      | 13                       |
| MH760607              | A/NSW/WM3453A/13                | 2013            | Australia | NA1      | 13                       |
| MH760608              | A/NSW/WM1112A/16                | 2016            | Australia | NA1      | 13                       |
| MH760609              | A/NSW/WM1514A/16                | 2016            | Australia | NA1      | 13                       |
| MH760610              | A/NSW/WM1585A/16                | 2016            | Australia | NA1      | 13                       |
| MH760611              | A/NSW/WM0467B/16                | 2016            | Australia | NA1      | 13                       |
| MH760612              | A/NSW/WM0166A/16                | 2016            | Australia | NA1      | 13                       |
| MH760613              | A/NSW/WM0672A/16                | 2016            | Australia | NA1      | 13                       |
| MH760616              | A/NSW/WM0371A/16                | 2016            | Australia | NA1      | 13                       |
| MH760617              | A/NSW/WM1681A/16                | 2016            | Australia | NA1      | 13                       |
| MH760619              | A/NSW/WM3743A/16                | 2016            | Australia | NA1      | 13                       |
| MH760620              | A/NSW/WM1053A/16                | 2016            | Australia | NA1      | 13                       |
| MH760621              | A/NSW/WM4241A/16                | 2016            | Australia | NA1      | 13                       |
| MH760622              | A/NSW/WM3992A/16                | 2016            | Australia | NA1      | 13                       |
| MH760623              | A/NSW/WM4754A/16                | 2016            | Australia | NA1      | 13                       |
| MH760624              | A/NSW/WM0737A/16                | 2016            | Australia | NA1      | 13                       |
| MH760625              | A/NSW/WM1079A/16                | 2016            | Australia | NA1      | 13                       |
| MH760627              | A/NSW/WM1045A/16                | 2016            | Australia | NA1      | 13                       |
| MH760628              | A/NSW/WM2369B/16                | 2016            | Australia | NA1      | 13                       |
| MH760629              | A/NSW/WM1991A/16                | 2016            | Australia | NA1      | 13                       |

---

|          |                  |      |           |     |    |
|----------|------------------|------|-----------|-----|----|
| MH760630 | A/NSW/WM0778A/16 | 2016 | Australia | NA1 | 13 |
| MH760631 | A/NSW/WM0879A/16 | 2016 | Australia | NA1 | 13 |
| MH760632 | A/NSW/WM1554A/16 | 2016 | Australia | NA1 | 13 |
| MH760633 | A/NSW/WM1825A/16 | 2016 | Australia | NA1 | 13 |
| MH760634 | A/NSW/WM1254A/16 | 2016 | Australia | NA1 | 13 |
| MH760635 | A/NSW/WM1670A/16 | 2016 | Australia | NA1 | 13 |
| MH760636 | A/NSW/WM2797A/16 | 2016 | Australia | NA1 | 13 |
| MH760638 | A/NSW/WM0230A/16 | 2016 | Australia | NA1 | 13 |
| MH760639 | A/NSW/WM4313A/16 | 2016 | Australia | NA1 | 13 |
| MH760641 | A/NSW/WM1473B/14 | 2014 | Australia | NA1 | 13 |

---



**Supplementary Table S1** (continued). Strains used in this study.

| GenBank accession No. | Strain                                        | Collection year | Country   | Genotype | References or authorship |
|-----------------------|-----------------------------------------------|-----------------|-----------|----------|--------------------------|
| MH760642              | A/NSW/WM2111B/14                              | 2014            | Australia | NA1      | 13                       |
| MH760643              | A/NSW/WM3837A/14                              | 2014            | Australia | NA1      | 13                       |
| MH760644              | A/NSW/WM2906A/14                              | 2014            | Australia | NA1      | 13                       |
| MH760645              | A/NSW/WM0279A/14                              | 2014            | Australia | NA1      | 13                       |
| MH760646              | A/NSW/WM0644C/14                              | 2014            | Australia | NA1      | 13                       |
| MH760647              | A/NSW/WM3790A/15                              | 2015            | Australia | NA1      | 13                       |
| MH760648              | A/NSW/WM2866A/15                              | 2015            | Australia | NA1      | 13                       |
| MH760649              | A/NSW/WM1676B/15                              | 2015            | Australia | NA1      | 13                       |
| MH760651              | A/NSW/WM0359B/15                              | 2015            | Australia | NA1      | 13                       |
| MK109773              | RSVA/Homo sapiens/JOR/D3140/2011              | 2011            | Jordan    | NA1      | Tan, G. et al.           |
| MK109774              | RSVA/Homo sapiens/JOR/C2101/2011              | 2011            | Jordan    | NA1      | Tan, G. et al.           |
| MK109775              | RSVA/Homo sapiens/JOR/B1318/2011              | 2011            | Jordan    | NA1      | Tan, G. et al.           |
| MK109776              | RSVA/Homo sapiens/JOR/D3159/2011              | 2011            | Jordan    | NA1      | Tan, G. et al.           |
| MK109777              | RSVA/Homo sapiens/JOR/D3120/2011              | 2011            | Jordan    | NA1      | Tan, G. et al.           |
| MK109785              | RSVA/Homo sapiens/JOR/D3055/2010              | 2010            | Jordan    | NA1      | Tan, G. et al.           |
| MK109787              | RSVA/Homo sapiens/JOR/C2152/2011              | 2011            | Jordan    | NA1      | Tan, G. et al.           |
| MK167035              | 8L8                                           | 2008            | USA       | NA1      | Greninger, A.L. et al.   |
| MK167036              | 6B2                                           | 2006            | USA       | NA1      | Greninger, A.L. et al.   |
| MK749867              | RSVA/Homo sapiens/NIC/IIIIn_16_0242_01NT/2016 | 2016            | Nicaragua | NA1      | Tan, G. et al.           |
| MK749884              | RSVA/Homo sapiens/NIC/IIIIn_16_0313_01NT/2016 | 2016            | Nicaragua | NA1      | Tan, G. et al.           |
| MK749890              | RSVA/Homo sapiens/NIC/IIIIn_16_0270_01NT/2016 | 2016            | Nicaragua | NA1      | Tan, G. et al.           |
| MK749893              | RSVA/Homo sapiens/NIC/IIIIn_16_0244_01NT/2016 | 2016            | Nicaragua | NA1      | Tan, G. et al.           |
| MK749909              | RSVA/Homo sapiens/NIC/IIIIn_16_0267_01NT/2016 | 2016            | Nicaragua | NA1      | Tan, G. et al.           |
| MK749911              | RSVA/Homo sapiens/NIC/IIIIn_16_0238_01NT/2016 | 2016            | Nicaragua | NA1      | Tan, G. et al.           |
| MK749912              | RSVA/Homo sapiens/NIC/IIIIn_15_0256_01NT/2015 | 2015            | Nicaragua | NA1      | Tan, G. et al.           |
| MK749913              | RSVA/Homo sapiens/NIC/IIIIn_16_0250_01NT/2016 | 2016            | Nicaragua | NA1      | Tan, G. et al.           |
| MK749917              | RSVA/Homo sapiens/NIC/IIIIn_16_0265_01NT/2016 | 2016            | Nicaragua | NA1      | Tan, G. et al.           |
| MN251607              | GH100344/USA/2011                             | 2011            | USA       | NA1      | Chu, H. et al.           |
| MN306017              | SC0135                                        | 2018            | USA       | NA1      | Lin, M.J. et al.         |
| MN306021              | SC0237                                        | 2018            | USA       | NA1      | Lin, M.J. et al.         |
| MN306029              | SC0398                                        | 2019            | USA       | NA1      | Lin, M.J. et al.         |
| MN306030              | SC0410                                        | 2019            | USA       | NA1      | Lin, M.J. et al.         |
| MN306031              | SC0460                                        | 2019            | USA       | NA1      | Lin, M.J. et al.         |
| MN306045              | SC0850                                        | 2019            | USA       | NA1      | Lin, M.J. et al.         |
| MN306048              | SC0885                                        | 2019            | USA       | NA1      | Lin, M.J. et al.         |
| MN306050              | SC1053                                        | 2019            | USA       | NA1      | Lin, M.J. et al.         |
| MN310477              | SC0276                                        | 2018            | USA       | NA1      | Lin, M.J. et al.         |
| MN531557              | GH300327/USA/2013                             | 2013            | USA       | NA1      | Chu, H. et al.           |
| MN630090              | RSVA/USA/UAMS-DID-009/2016                    | 2016            | USA       | NA1      | Kothari, A. et al.       |
| MN630091              | RSVA/USA/UAMS-DID-011/2016                    | 2016            | USA       | NA1      | Kothari, A. et al.       |
| MN630092              | RSVA/USA/UAMS-DID-015/2016                    | 2016            | USA       | NA1      | Kothari, A. et al.       |
| MN630094              | RSVA/USA/UAMS-DID-018/2016                    | 2016            | USA       | NA1      | Kothari, A. et al.       |
| MN630099              | RSVA/USA/UAMS-DID-028/2016                    | 2016            | USA       | NA1      | Kothari, A. et al.       |
| MN630100              | RSVA/USA/UAMS-DID-040/2016                    | 2016            | USA       | NA1      | Kothari, A. et al.       |
| MN630101              | RSVA/USA/ACRI-037/2016                        | 2016            | USA       | NA1      | Kothari, A. et al.       |
| MN630102              | RSVA/USA/ACRI-039/2016                        | 2016            | USA       | NA1      | Kothari, A. et al.       |
| MN630103              | RSVA/USA/ACRI-046/2016                        | 2016            | USA       | NA1      | Kothari, A. et al.       |
| MN630105              | RSVA/USA/ACRI-056/2016                        | 2016            | USA       | NA1      | Kothari, A. et al.       |
| MN630106              | RSVA/USA/ACRI-064/2016                        | 2016            | USA       | NA1      | Kothari, A. et al.       |

|          |                             |      |           |     |                          |
|----------|-----------------------------|------|-----------|-----|--------------------------|
| MN630107 | RSVA/USA/ACRI-053/2016      | 2016 | USA       | NA1 | Kothari, A. et al.       |
| MT422269 | RSVA/Novosibirsk/108Hp/2019 | 2019 | Russia    | NA1 | Dubovitskiy, N.A. et al. |
| MT422270 | RSVA/Novosibirsk/138Hp/2019 | 2019 | Russia    | NA1 | Dubovitskiy, N.A. et al. |
| MT422271 | RSVA/Novosibirsk/893Hp/2019 | 2019 | Russia    | NA1 | Dubovitskiy, N.A. et al. |
| JX198112 | Long                        | 1956 | USA       | 1   |                          |
| KJ155694 | A2                          | 1961 | Australia | 25  |                          |
| JX198143 | CH-18537                    | 1962 | USA       |     | Tapia, L.I. et al.       |
| D00953   | RB 94                       | 1969 | Belgium   | 26  |                          |

## References

- Tapia, L.I.; Shaw, C.A.; Aideyan, L.O.; Jewell, A.M.; Dawson, B.C.; Haq, T.R.; Piedra, P.A. Gene sequence variability of the three surface proteins of human respiratory syncytial virus (HRSV) in Texas. *PLoS ONE* **2014**, *9*, E90786.
- Rossey, I.; Gilman, M.S.; Kabeche, S.C.; Sedeyn, K.; Wrapp, D.; Kanekiyo, M.; Chen, M.; Mas, V.; Spitaels, J.; Melero, J.A.; Graham, B.S.; Schepens, B.; McLellan, J.S.; Saelens, X. Potent single-domain antibodies that arrest respiratory syncytial virus fusion protein in its prefusion state. *Nat. Commun.* **2017**, *8*, 14158.
- Rebuffo-Scheer, C.; Bose, M.E.; He, J.; Khaja, S.; Ulatowski, M.; Beck, E.T.; Fan, J.; Kumar, S.; Nelson, M.I.; Henrickson, K.J. Whole genome sequencing and evolutionary analysis of human respiratory syncytial virus A and B from Milwaukee, WI 1998–2010. *PLoS ONE* **2011**, *6*, E25468.
- Tan, L.; Lemey, P.; Houspie, L.; Viveen, M.C.; Jansen, N.J.; van Loon, A.M.; Wiertz, E.; van Bleek, G.M.; Martin, D.P.; Coenjaerts, F.E. Genetic variability among complete human respiratory syncytial virus subgroup A genomes: bridging molecular evolutionary dynamics and epidemiology. *PLoS ONE* **2012**, *7*, E51439.
- Agoti, C.N.; Otieno, J.R.; Munywoki, P.K.; Mwihuri, A.G.; Cane, P.A.; Nokes, D.J.; Kellam, P.; Cotten, M. Local evolutionary patterns of human respiratory syncytial virus derived from whole-genome sequencing. *J. Virol.* **2015**, *89*, 3444–3454.
- Widjoatmodjo, M.N.; Boes, J.; van Bers, M.; van Remmerden, Y.; Roholl, P.J.; Luytjes, W. A highly attenuated recombinant human respiratory syncytial virus lacking the G protein induces long-lasting protection in cotton rats. *Virol. J.* **2010**, *7*, 114.
- Xia, Q.; Zhou, L.; Peng, C.; Hao, R.; Ni, K.; Zang, N.; Ren, L.; Deng, Y.; Xie, X.; He, L.; Tian, D.; Wang, L.; Huang, A.; Zhao, Y.; Zhao, X.; Fu, Z.; Tu, W.; Liu, E. Detection of respiratory syncytial virus fusion protein variants between 2009 and 2012 in China. *Arch. Virol.* **2014**, *159*, 1089–1098.
- Zhang, K.; He, J.; Li, C.; Bose, M.E.; Henrickson, K.J.; Zhou, J.; Zheng, B.J. Complete genome sequences of one human respiratory syncytial antigenic group A virus from china and its four mouse-adapted isolates. *Genome Announc.* **2015**, *3*, e00062–15.
- Song, J.; Wang, H.; Ng, T.I.; Cui, A.; Zhu, S.; Huang, Y.; Sun, L.; Yang, Z.; Yu, D.; Yu, P.; Zhang, H.; Zhang, Y.; Xu, W. Sequence analysis of the fusion protein gene of human respiratory syncytial virus circulating in China from 2003 to 2014. *Sci. Rep.* **2018**, *8*, 17618.
- Grad, Y.H.; Newman, R.; Zody, M.; Yang, X.; Murphy, R.; Qu, J.; Malbouef, C.M.; Levin, J.Z.; Lipsitch, M.; DeVincenzo, J. Within-host whole-genome deep sequencing and diversity analysis of human respiratory syncytial virus infection reveals dynamics of genomic diversity in the absence and presence of immune pressure. *J. Virol.* **2014**, *88*, 7286–7293.
- Do, L.A.; Wilm, A.; van Doorn, H.R.; Lam, H.M.; Sim, S.; Sukumaran, R.; Tran, A.T.; Nguyen, B.H.; Tran, T.T.; Tran, Q.H.; Vo, Q.B.; Tran Dac, N.A.; Trinh, H.N.; Nguyen, T.T.; Le Binh, B.T.; Le, K.; Nguyen, M.T.; Thai, Q.T.; Vo, T.V.; Ngo, N.Q.; Dang, T.K.; Cao, N.H.; Tran, T.V.; Ho, L.V.; Farrar, J.; De Jong, M.; Chen, S.; Nagarajan, N.; Bryant, J.E.; Hibberd, M.L. Direct whole-genome deep-sequencing of human respiratory syncytial virus A and B from Vietnamese children identifies distinct patterns of inter- and intra-host evolution. *J. Gen. Virol.* **2015**, *96*, 3470–3483.
- Chen, X.; Xu, B.; Guo, J.; Li, C.; An, S.; Zhou, Y.; Chen, A.; Deng, L.; Fu, Z.; Zhu, Y.; Liu, C.; Xu, L.; Wang, W.; Shen, K.; Xie, Z. Genetic variations in the fusion protein of respiratory syncytial virus isolated from children hospitalized with community-acquired pneumonia in China. *Sci. Rep.* **2018**, *8*, 4491.
- Di Giallardo, F.; Kok, J.; Fernandez, M.; Carter, I.; Geoghegan, J.L.; Dwyer, D.E.; Holmes, E.C.; Eden, J.S. Evolution of human respiratory syncytial virus (RSV) over multiple seasons in New South Wales, Australia. *Viruses* **2018**, *10*, E476.
- Lee, W.J.; Kim, Y.J.; Kim, D.W.; Lee, H.S.; Kim, H.Y.; Kim, K. Complete genome sequence of human respiratory syncytial virus genotype A with a 72-nucleotide duplication in the attachment protein G gene. *J. Virol.* **2012**, *86*, 13810–13811.
- Choudhary, M.L.; Wadhwa, B.S.; Jadhav, S.M.; Chadha, M.S. Complete genome sequences of two human respiratory syncytial virus genotype A strains from India, RSV-A/NIH114046/11 and RSV-A/NIH114073/11. *Genome Announc.* **2013**, *1*, e00165–13.
- Gu, H.; Xie, Z.; Li, T.; Zhang, S.; Lai, C.; Zhu, P.; Wang, K.; Han, L.; Duan, Y.; Zhao, Z.; Yang, X.; Xing, L.; Zhang, P.; Wang, Z.; Li, R.; Yu, J.J.; Wang, X.; Yang, P. Angiotensin-converting enzyme 2 inhibits lung injury induced by respiratory syncytial virus. *Sci. Rep.* **2016**, *6*, 19840.
- Ren, L.; Xia, Q.; Xiao, Q.; Zhou, L.; Zang, N.; Long, X.; Xie, X.; Deng, Y.; Wang, L.; Fu, Z.; Tian, D.; Zhao, Y.; Zhao, X.; Li, T.; Huang, A.; Liu, E. The genetic variability of glycoproteins among respiratory syncytial virus subtype A in China between 2009 and 2013. *Infect. Genet. Evol.* **2014**, *27*, 339–347.
- Yun, M.R.; Kim, A.R.; Lee, H.S.; Kim, D.W.; Lee, W.J.; Kim, K.; Kim, S.S.; Kim, Y.J. Complete genome sequences of human respiratory syncytial virus genotype A and B isolates from South Korea. *Genome Announc.* **2015**, *3*, e00332–15.
- Fu, X.; Cheng, Y.; He, Z.; Dong, W.; Lan, K.; Zhang, C.; Hu, Y. Complete genome sequence of human respiratory syncytial virus from Shanghai, China. *Genome Announc.* **2015**, *3*, e00989–15.
- Gong, Y.N.; Yang, S.L.; Chen, G.W.; Chen, Y.W.; Huang, Y.C.; Ning, H.C.; Tsao, K.C. A metagenomics study for the identification of respiratory viruses in mixed clinical specimens: an application of the iterative mapping approach. *Arch. Virol.* **2017**, *162*, 2003–2012.
- Malasao, R.; Furuse, Y.; Okamoto, M.; Daput, C.; Saito, M.; Saito-Obata, M.; Tamaki, R.; Segubre-Mercado, E.; Lupisan, S.; Oshitani, H. Complete genome sequences of 13 human respiratory syncytial virus subgroup A strains of genotypes NA1 and ON1 isolated in the Philippines. *Genome Announc.* **2018**, *6*, e00151–18.
- Okamoto, M.; Daput, C.P.; Sandagon, A.M.D.; Batangan-Nacion, L.P.; Lirio, I.C.; Tamaki, R.; Saito, M.; Saito-Obata, M.; Lupisan, S.P.; Oshitani, H. Molecular characterization of respiratory syncytial virus in children with repeated infections with subgroup B in the Philippines. *J. Infect. Dis.* **2018**, *218*, 1045–1053.
- Goya, S.; Valinotto, L.E.; Tittarelli, E.; Rojo, G.L.; Nabaes Jodar, M.S.; Greninger, A.L.; Zaiat, J.J.; Marti, M.A.; Mistchenko, A.S.; Viegas, M. An optimized methodology for whole genome sequencing of RNA respiratory viruses from nasopharyngeal aspirates. *PLoS ONE* **2018**, *13*, e0199714.
- Otieno, J.R.; Kamau, E.M.; Oketch, J.W.; Ngoi, J.M.; Gichuki, A.M.; Binter, S.; Otieno, G.P.; Ngama, M.; Agoti, C.N.; Cane, P.A.; Kellam, P.; Cotten, M.; Lemey, P.; Nokes, D.J. Whole genome analysis of local Kenyan and global sequences unravels the epidemiological and molecular evolutionary dynamics of RSV genotype ON1 strains. *Virus Evol.* **2018**, *4*, vey027.
- Patton, K.; Aslam, S.; Lin, J.; Yu, L.; Lambert, S.; Dawes, G.; Esser, M.T.; Woo, J.; Janetzki, S.; Cherukuri, A. Enzyme-linked immunosorbent assay for detection of human respiratory syncytial virus f protein-specific gamma interferon-producing T cells. *Clin. Vaccine Immunol.* **2014**, *21*, 628–635.
- Baybutt, H.N.; Pringle, C.R. Molecular cloning and sequencing of the F and 22K membrane protein genes of the RSS-2 strain of respiratory syncytial virus. *J. Gen. Virol.* **1987**, *68* (Pt 11), 2789–2796.

**Supplementary Table S2.** Evolutionary rates for each genotype. As noted, the genotype GA6 was not examined due to small strain numbers (6 strains).

|                              | Evolutionary rates (95%HPD)<br>(substitutions/site/year)                |
|------------------------------|-------------------------------------------------------------------------|
| All RSV-A<br>(1,465 strains) | $7.69 \times 10^{-4}$ ( $7.10 \times 10^{-4}$ - $8.29 \times 10^{-4}$ ) |
| GA1<br>(35 strains)          | $4.48 \times 10^{-4}$ ( $2.79 \times 10^{-4}$ - $6.24 \times 10^{-4}$ ) |
| GA2<br>(77 strains)          | $8.34 \times 10^{-4}$ ( $6.43 \times 10^{-4}$ - $1.04 \times 10^{-3}$ ) |
| GA3<br>(28 strains)          | $8.02 \times 10^{-4}$ ( $5.15 \times 10^{-4}$ - $1.09 \times 10^{-3}$ ) |
| GA4<br>(17 strains)          | $6.04 \times 10^{-4}$ ( $2.22 \times 10^{-4}$ - $1.00 \times 10^{-3}$ ) |
| GA5<br>(174 strains)         | $7.11 \times 10^{-4}$ ( $5.82 \times 10^{-4}$ - $8.34 \times 10^{-4}$ ) |
| GA7<br>(34 strains)          | $7.56 \times 10^{-4}$ ( $4.97 \times 10^{-4}$ - $1.02 \times 10^{-3}$ ) |
| NA1<br>(1,092 strains)       | $7.61 \times 10^{-4}$ ( $6.85 \times 10^{-4}$ - $8.38 \times 10^{-4}$ ) |

**Supplementary Table S3.** Phylogenetic distances for each genotype.

|                              | Phylogenetic distance<br>(mean $\pm$ SD) |
|------------------------------|------------------------------------------|
| All RSV-A<br>(1,465 strains) | $0.024 \pm 0.021$                        |
| GA1<br>(35 strains)          | $0.006 \pm 0.004$                        |
| GA2<br>(77 strains)          | $0.012 \pm 0.006$                        |
| GA3<br>(28 strains)          | $0.017 \pm 0.007$                        |
| GA4<br>(17 strains)          | $0.010 \pm 0.004$                        |
| GA5<br>(174 strains)         | $0.010 \pm 0.004$                        |
| GA6<br>(6 strains)           | $0.007 \pm 0.004$                        |
| GA7<br>(34 strains)          | $0.011 \pm 0.006$                        |
| NA1<br>(1,092 strains)       | $0.008 \pm 0.003$                        |
